1 **Investigating the long-term stability of protein immunogen(s) for**  
2 **whole recombinant yeast-based vaccines**

3 **\*Ravinder Kumar**

4 Section of Molecular Biology, Division of Biological Sciences, University of California San  
5 Diego, 9500 Gilman Drive, La Jolla, San Diego, California-92093, USA

6  
7 **\*Correspondence address**

8 Section of Molecular Biology, Division of Biological Sciences, University of California San  
9 Diego, 9500 Gilman Drive, La Jolla, San Diego, California-92093, USA

10 Email: [raj86tau@gmail.com](mailto:raj86tau@gmail.com)

11  
12 **Running title:** Stability of heterologous protein antigens in the cellular environment of  
13 stationary phase *Saccharomyces cerevisiae*

14  
15 **Subject:** Research Article

31 **Abstract**

32 Even today vaccine(s) remains a mainstay in combating infectious diseases. Many yeast-based  
33 vaccines are currently in different phases of clinical trials. Despite the encouraging results of  
34 whole recombinant yeast (WRY) and yeast display (YD), the systematic study assessing the  
35 long-term stability of protein antigen(s) in yeast cells is still missing. Therefore, in the present  
36 study, I investigate the stability of heterologous protein antigen in the cellular environment of *S.*  
37 *cerevisiae* through *E. coli* surface protein (major curlin or CsgA). Present biochemical data  
38 showed that the stationary phase yeast cells were able to keep the antigen stable for almost one  
39 year when stored at 2-8 °C and 23-25 °C. Further, iTRAQ based quantitative proteomics of yeast  
40 whole cell lysate showed that the level of heterologous fusion protein was low in cells stored at  
41 23-25 °C compared to those at 2-8 °C. In the end, I also proposed a workable strategy to test  
42 integrity or completeness of heterologous protein in the yeast cell. I believe that the observations  
43 made in the present study will be really encouraging for those interested in the development of a  
44 whole recombinant yeast-based vaccine(s).

45

46 **Keywords:** Antigen, Stationary-phase, Vaccine, Yeast

47

48

49

50

51

52

53

54

55

56

57

58

59

60

61

## 62 **Introduction**

63 Vaccines remains an important and mainstay in preventing infectious diseases (Bachler et al.  
64 2013; Perrie et al. 2007; Black et al. 2010). Most of the presently licensed vaccine(s) involve  
65 deliberate administration of attenuated or killed pathogen (Shams 2005). Conventional vaccine  
66 development regime involved mass culture of an associated or closely related organism and this  
67 hampered vaccine development against important infectious diseases including malaria and  
68 leprosy (Scollard et al. 2006; Cox 1991). Apart from that, conventional vaccines suffered from  
69 various issues neatly summarized elsewhere (Pastoret 1999; Narasimhan et al. 2015; Fang et al.  
70 2106; Lorry et al. 2014).

71 The arrival of recombinant DNA technology and a parallel improvement in protein purification  
72 chemistry allows expression and purification of an unlimited amount of heterologous protein(s)  
73 in almost all types of cells ranging from prokaryotes (example *E. coli*, *B. subtilis*) to eukaryotes  
74 including yeast, insects, plants, animals. But professional working in concerned discipline  
75 chooses yeast as a model for expression of heterologous proteins for use in vaccine development  
76 for reasons mentioned elsewhere (Walker 1998; Gellissen et al. 1997; Rose et al. 1987; Strathern  
77 et al. 1982; Broach et al. 1991; Valenzuela et al. 1982). So far, yeast (mainly *S. cerevisiae* and *P.*  
78 *pastoris*) emerges as the main workhorse for expression and purification of heterologous proteins  
79 with pharmaceutical value. As a result, many of the proteins expressed and purified from yeast  
80 are under different phase of clinical trials (Weidang et al. 2014; Ardiani et al. 2010; Bilusic et al.  
81 2014), and protein purified from yeast for the purpose of prophylactic vaccine (example hepatitis  
82 B vaccine) is already in market (Valenzuela et al. 1982).

83 Although peptide-based vaccines somehow overcome the issue associated with the conventional  
84 regime of vaccine development and application. But the problem of poor immunogenic response,  
85 fast body clearance, an addition of adjuvant and protein stabilizer means a better alternative of  
86 both conventional and peptide-based vaccines is must (Purcell et al. 2007; Aguilar et al. 2007).  
87 Apart from that, continuous maintenance of 2-8 °C cold chain from point of manufacturing unit  
88 till endpoint user especially in resource-poor settings is a big challenge in presently available  
89 vaccines (Chen et al. 2011, Das 2004).

90 Issues associated with conventional and peptide-based vaccine lead to the development of a  
91 novel strategy of using yeast in vaccine development which culminates into the use of whole  
92 recombinant yeast (WRY) and yeast display (YD). Use of WRY and YD proved much better as

93 these strategies do not involve protein purification, the addition of protein stabilizers and  
94 adjuvant (as yeast cell wall acts as natural adjuvant), particulate nature of yeast cells. Apart from  
95 that, yeast cells are efficiently taken-up by antigen presenting cells (APCs) including  
96 macrophages (Stubbs et al. 2001) and T cells (King et al. 2014, King et al. 2016). Thus, use of  
97 WRY and YD appears very promising and, in several cases, WRY based vaccine(s) have already  
98 reached various stages of clinical trials. For example, heat-killed whole recombinant budding  
99 yeast-based vaccine (GS-4774) against hepatitis B reached to phase-II of clinical trials (Lok et al.  
100 2016) while dead whole yeast was able to protect mice from pulmonary mucormycosis treated  
101 with diabetic ketoacidotic-steroid (Luo et al. 2014). Further, injecting killed recombinant yeast  
102 expressing hepatitis B virus protein was found safe and well tolerated in healthy subjects  
103 (Gaggar et al. 2014) and an oral vaccine against candidiasis was introduced using molecular  
104 display systems with *S. cerevisiae* (Shibasaki et al. 2016). All these and similar studies from  
105 different labs across the globe clearly showed the merits and benefits of using WRY and YD as  
106 yeast-based vaccines over conventional or peptide-based vaccines.

107 Despite the positive results from different labs against different infectious diseases and cancer a  
108 systematic study investigating long-term stability of protein antigens or immunogen in WRY is  
109 missing. This compelled us to investigate the long-term stability of heterologous proteins or  
110 antigens in the cellular environment of budding yeast. Our present data showed that protein  
111 antigens remain stable in yeast cells for up to a year when kept under refrigeration (i.e. at 2-8 °C)  
112 and room temperature (i.e. at 23-25°C). We further compared the level of heterologous protein  
113 antigens in stationary phased yeast cells kept at 2-8 °C and 23-25°C and present data showed that  
114 yeast cells kept under refrigeration condition were better in keeping the protein antigens.  
115 Western blot data was further confirmed by iTRAQ based quantitative proteomics which also  
116 showed a differential abundance of CsgA in whole cell lysates from cells stored at room  
117 temperature and under refrigerated condition. Surprisingly a minor fraction of cells remains  
118 viable even after a year in absence of nutrients, which means that it is important to use yeast  
119 strain which can enter into stationary phase, can remain intact but did not grow when came into a  
120 nutrient-rich niche like host body.

## 121 **Material and methods**

### 122 **Strains, media and culture condition**

123 Haploid wild-type budding yeast strain of BY4742 background (purchased from EUROSCARF,  
124 acc. no. Y10000) expressing *E. coli* CsgA-GFP (fusion protein) under GAP or Glyceraldehydes-  
125 3-phosphate dehydrogenase was used in the entire study. Primers used in amplification of curlin  
126 major from *E. coli* are (forward primer, PR1)  
127 ATGCGAATTCATGAAACTTTTAAAAGTAGCAGCAATTGC, (reverse primer, PR2)  
128 ATGCGGTACCGTACTGATGAGCGGTCGCG and (GFP reverse primer, PR3)  
129 CGTCGCCGTCCAGCTCGACCAG, used in sequencing. Yeast genetic manipulations were  
130 performed as described elsewhere (Longtine et al. 1998; Janke et al. 2004; Güldener et al. 1996).  
131 For amplification of CSGA, *E. coli* K-12 strain was purchased from ATCC (strain SMG123).  
132 GFP was amplified from plasmid purchased from addgene (plasmid # 21052, pESC-URA-ub-  
133 G76A-Rnq1-GFP).

134 Stationary phase was induced and checked in yeast cells as explained previously (Martinez et al.  
135 2004; Kumar et al. 2016) and briefly described here. A single colony of a haploid strain  
136 expressing CsgA-GFP (*E. coli* surface protein) under constitutive (GAP or Glyceraldehydes-3-  
137 phosphate dehydrogenase) promoter was inoculated in 5 mL YPD (1 % yeast extract, 2 %  
138 peptone and 2 % dextrose) and the tube was incubated at 30 °C, 250 rpm for overnight growth.  
139 Next day, overnight grown culture was used to inoculate 50 mL YPD such that initial OD<sub>600nm</sub>  
140 was 0.2. Flasks were then incubated at 30 °C; 250 rpm till growth ceased by checking OD<sub>600nm</sub> of  
141 culture by spectrophotometer at regular interval of 24 hour. The culture was regularly checked  
142 for any contamination and cell morphology.

### 143 **Protein extraction**

144 A known number of cells were re-suspended in TCA (tri chloro acetic acid) such that final  
145 concentration of TCA was 20 % and cells were frozen at -80 °C for at least one-hour. After one-  
146 hour tubes were taken out of deep the freezer and thawed at room temperature. Tubes were  
147 centrifuged at 14000g for 8-10 min and the supernatant was discarded. Resulted pellet was  
148 resuspended in 1 mL chilled 100 % acetone using sonicator. Tubes were again centrifuged as  
149 above, and the supernatant was again discarded, and protein pellet was air dried and re-  
150 suspended in protein solubilization buffer (7 M Urea, 2 M Thiourea, 4 % CHAPS) (Reddy et al.  
151 2013).

### 152 **Western blots**

153 Western blot was performed as described previously (Kumar et al. 2014).

154 **Buffer exchange, in solution digestion, iTRAQ labelling, LC-MS/MS, Data acquisition and**  
155 **analysis**

156 For comparing the level of CsgA in yeast cells, quantitative iTRAQ based proteomic analysis  
157 was performed. Amount of protein in whole cell lysate was estimated using 2-D Quant Kit (from  
158 GE). An equal amount of whole cell lysate protein was labelled with iTRAQ reagent using the 4-  
159 plex kit (from AB SCIEX). Rest procedure was performed as described previously. Data  
160 acquisition and analysis were performed as explained in detailed elsewhere (Kumar et al. 2016,  
161 Reddy et al. 2015). During analysis of MS/MS data using Spectrum Mill (Agilent), taxonomy  
162 was kept as *E. coli*.

163 **Fluorescence microscopy**

164 All the images were captured using Zeiss Axio vision microscope using appropriate filters.

165 **Accession number**

166 Gene cloned in this study was deposited in Gene bank with following accession number  
167 MH264502

168 **RESULTS**

169 **The basic logic behind the study and workflow**

170 Over the last two to three decades, more than four hundred of papers (including research articles,  
171 reviews, case reports) appears which showed the utility of yeast species for expression and  
172 purification of heterologous proteins for vaccines (both prophylactic and therapeutic), and other  
173 pharmaceutical application. Many of the proteins expressed and purified from yeast are in  
174 different phases of clinical trials (Ardiani et al. 2010) and one of them have already hit the  
175 markets (Valenzuela et al. 1982) long back.

176 Further to make the process more rapid, robust and to cut down the cost involved in protein  
177 purification, use of whole recombinant yeast and yeast display appeared promising. Many labs  
178 already showed the usefulness of whole recombinant yeast and yeast display in development of a  
179 yeast-based vaccine(s). But the long-term stability of expressed immunogen (both in whole  
180 recombinant yeast and yeast display) remains elusive. Further, a systematic study evaluating the  
181 effect of temperature on the long-term stability (here stability means the complete amino acid  
182 sequence of the expressed protein) of heterologous proteins is also missing.

183 Therefore, in the present study, I investigate the stability of heterologous protein *viz* major curlin  
184 (*E. coli* surface protein, CsgA-GFP) in the cellular environment of *S. cerevisiae* (with the

185 assumption that cellular environment will be the most suitable environment for the long-term  
186 stability of protein). I further study the effect of temperature on the long-term stability of  
187 heterologous protein as antigen and the basic workflow of the present study are shown in figure  
188 1.

189 The reason for using stationary phase cells are 1) it allows complete utilization of nutrients and  
190 harvesting of a large number of cells compared to the culture at mid-log or pre-stationary phase  
191 and 2) normal cycling cells cannot be stored at room temperature for a long time let say one year  
192 or more and finally 3) stationary phase cells are better in coping the temperature fluctuations  
193 which is important in the stability of expressed antigen(s) or immunogen(s).

### 194 **Cloning and expression of the CsgA-GFP fusion protein**

195 Although one can express any heterologous protein, just as a proof of concept I am taking  
196 bacterial curlin. And believe that other heterologous protein express in yeast will behave  
197 similarly from the point of stability in the cellular environment. Curlin is component of bacterial  
198 fimbriae, structure important for bacterial attachment to another surface. Homologs of curlin  
199 have been already reported in a number of bacterial species and curlin was also detected in  
200 surrounding medium (Olsen et al. 1998; Loferer et al. 1997).

201 *E. coli* surface protein, curlin (CsgA-GFP) was cloned into yeast expression vector under  
202 constitutive GAP promoter (for overexpression). Cloning was performed in two steps and maps  
203 of both the plasmids (with essential features) used in cloning are shown in fig 2E and fig. 2F for  
204 plasmids p1 and p2 respectively, (cartoon presentation) while the nucleotide and amino acid  
205 sequence of CsgA are shown in figure 2A and figure 2B respectively. CsgA ORF was PCR  
206 amplified from wild-type *E. coli* K-12 strain using the primers mentioned in material and  
207 methods (Fig 2C). PCR product was treated with *EcoRI* and *KpnI* restriction endonuclease in  
208 CutSmart buffer (from NEB) for one hour and column purified. Parent plasmid with GFP was  
209 also treated with same restriction enzymes and gel elution was performed. Ligation was  
210 performed at 16 °C for overnight and ligation mix was transformed into *E. coli* competent cells  
211 and transformants were selected on LB plus ampicillin plate(s). Positive transformants were  
212 checked by sequencing using a reverse primer from GFP. Resulted p1 plasmid (Fig. 2E) was  
213 treated with *EcoRI* and *AgeI* to release CSGA-GFP cassette (Fig. 2D). Cassette was gel eluted  
214 and inserted or cloned into a plasmid having GAP promoter for overexpression. Final plasmid p2  
215 (Fig 2F) was digested with *StuI* and digested product was transformed into wild-type haploid



216 yeast strain (Guldener et al. 1996). Positive transformants were selected on *his<sup>-</sup>* plate and  
217 expression of a fusion protein (CsgA-GFP) was checked by western blot using anti-GFP  
218 antibodies (Fig. 2G). Positive transformants showing proper expression and translated protein (as  
219 checked by western blot, Fig 2G) were further used for induction of stationary phase in yeast  
220 cells as mentioned in next section.

### 221 **Induction of stationary phase storage of samples**

222 Positive transformants were patched on fresh YPD plate and plate was incubated at 30 °C till  
223 sufficient biomass appears on the plate. These patches were used for inoculating 5 mL YPD and  
224 tubes were incubated at 30 °C, 250 rpm for overnight growth. This overnight grown culture was  
225 used for inoculation of 50 mL YPD (in 250 mL flask) such that initial OD<sub>600nm</sub> was close to  
226 0.200. Flasks were incubated at 30 °C, 250 rpm and cell density were checked after every 24  
227 hours (Fig. 3A) till growth ceases and cell entered stationary phase (almost all cells become  
228 round) as confirmed by cell morphology (round cells) (Fig. 3B) (Kumar et al. 2016; ), cell  
229 viability assay (Fig. 3C) as it is known that stationary phase cell can remain viable for extended  
230 period even in absence of nutrients (Kumar et al. 2016;) and FACS analysis (Fig. 23) as  
231 stationary phase cells arrested at G<sub>1</sub> (Kumar et al. 2016). Apart from that stationary phase was  
232 also checked by detecting Spg4-HA (stationary phase protein 4) which are present in cells only  
233 under stationary phase (data not shown) (Kumar et al. 2016). Thus, stationary phase nature of  
234 cells was confirmed by different ways before cells were stored for a period of one year.

### 235 **Stability of CsgA-GFP fusion protein**

236 From each of three flasks, 1 mL cell suspension was transferred into separate sterile eppendorf  
237 tubes such that each tube received around 13 OD<sub>600nm</sub> of yeast cells. After dispensing cell  
238 suspension half tubes were stored at 2-8 °C and remaining half at 23-25 °C. Then after every one  
239 month, three tubes each from 2-8 °C and 23-25°C were taken out and OD<sub>600nm</sub> were measured till  
240 the end of 12 months. Measurement of OD<sub>600nm</sub> over the year showed that there is a gradual  
241 decrease in OD<sub>600nm</sub> (Fig. 4A), suggesting the cells may be dying. At the end of the one-year  
242 final, OD of cells in tubes comes down close to 4.0. In figure, 4A data is shown only for one set,  
243 while the experiment was performed thrice, and all three set followed the same trend.

244 Further, it was observed that pace with which OD<sub>600nm</sub> decreases was more in tubes stored at 23-  
245 25 °C compared to those stored at 2-8 °C although the difference in OD<sub>600nm</sub> after one year was  
246 not that much significant. Apart from that we also observed the sharp difference in cell



247 morphology after one year (Fig. 4B). The morphology of cells stored under refrigerated  
248 condition (Fig. 4B middle panel) was more like to normal cycling cells used as control (Fig. 4B  
249 left panel) compared to those stored at room temperature for a year (Fig. 4B right panel). Present  
250 microscopic data showed that more number of cells lose their intact nature when stored at room  
251 temperature.

252 After observing and comparing the morphology of cells stored at two different conditions, we  
253 check the level of the CsgA-GFP fusion protein in those cells by western blot. Protein in whole  
254 the cell lysate was extracted as described in material and methods and proteins were resolved on  
255 10 % SDS-PAGE. Proteins were transferred on to PVDF membrane and the fusion protein was  
256 detected using anti-GFP antibodies (Fig. 4C, D). Present western blot data showed that stationary  
257 phase yeast cells were able to keep fusion protein (CsgA-GFP or curlin) intact for a period of one  
258 year under both the conditions of storage. To give an idea about the nature of whole cell lysate,  
259 the complete image of Ponceau S stained blot is also provided below their respective western  
260 blot image (Fig. 4E, F for blot image shown in Fig. 4C, D respectively).

261 The intensity of bands in western blot image in Fig. 4C and D were calculated using Image J  
262 software. Histograms showing the combined intensities of the bands in figure 4C, D is shown in  
263 figure 4G, H respectively. Thus, combined results of western blot and histogram showed that  
264 level of fusion proteins is significantly low when the comparison was made on the number of  
265 cells, although heterologous fusion protein remains stable at both the temperature of storage.

266 I further compare the level of a fusion protein between the cells stored at 2-8 °C to those stored  
267 at 23-25 °C and present western blot data suggests that level of a fusion protein is more in cells  
268 stored at 2-8 °C compared to those at 23-25 °C (Fig. 5A). Complete blot image for the figure  
269 5A is shown in figure 5B. It is important to mention that western blot data shown so far in figure  
270 4 and figure 5, proteins were normalized based on cell numbers rather on absolute protein  
271 quantification. The intensity of bands was calculated using Image J software and histogram  
272 showing relative intensities of bands in figure 5A is shown in figure 5C.

273 Further to get a better idea about the relative abundance of a fusion protein in cells stored at two  
274 different conditions, the protein concentration in cell lysate was calculated and an equal amount  
275 of protein was desalted, digested with trypsin and resulted peptides were labelled with iTRAQ  
276 reagents. Present iTRAQ (Ross et al. 2004) based quantitative proteomics showed the level of  
277 curlin protein was more in cells stored under refrigerated conditions compared to those which

278 were stored at room temperature (Fig. 5D). Present iTRAQ data also confirmed and validated the  
279 western blot data. Just like western blot iTRAQ based quantitative analysis also showed an  
280 increased amount of curlin protein (Fig. 5C) in whole cell lysate from cells stored under  
281 refrigerated condition compared to those stored at room temperature. In the present study, cell  
282 lysate from refrigerated cells was labelled with 115,117 and those at room temperature with 114,  
283 116 labels. It is important to mention that essentially same whole cell lysate was used in both  
284 western blots and in the iTRAQ experiment.

285 I further compare the level of CsgA-GFP using western blot after normalizing protein on basis of  
286 protein quantification (like the iTRAQ experiment, mentioned above) and results of western blot  
287 are in accordance with iTRAQ data (data not shown).

### 288 **Viability of stationary phase cells**

289 Studies from different labs in past and our own previous study (Kumar et al. 2016) showed that  
290 stationary phase yeast cells retain the viability for extended periods even in absence of nutrients;  
291 therefore I further checked the viability of cells after one year. Cell viability was checked by  
292 plating around 300 cells on YPD plates. The plating assay showed that almost all cells lose  
293 viability after one year irrespective of the temperature of incubation or storage (Fig. 6A, B).  
294 Results of plating assay were further confirmed by checking the viability by trypan blue staining  
295 and results of trypan blue staining are in accordance with that of plating assay (Fig. 6C). In  
296 another set of experiment, the whole content of tubes (three tubes each from refrigerated  
297 condition and from room temperature) was plated on fresh YPD plates and this time we got a  
298 huge number of colonies, suggesting a significant number of cells retain viability even after one  
299 year in absence of nutrients (data not shown).

300 Although the level of immune response raised by yeast cells expressing immunogen of interest is  
301 independent of nature of cells i.e. whether cells are alive or dead (Franzsoff et al. 2005), but  
302 still it will not be desirable or advisable to inject live cells especially in individual which are on  
303 immunosuppressive medication (example organ transplant) or those with compromised immune  
304 system (example AIDs patients). And therefore, it is important that those strains should be used  
305 in WRY and YD which can enter into stationary phase, can hold immunogen stable for periods  
306 of a year or longer but could not grow when came into the environment rich of nutrients.

### 307 **DISCUSSION**

308 In general, peptide-based vaccines overcome many issues associated with the conventional  
309 regime of vaccine development as mentioned in the introduction section. But peptide-based  
310 vaccines are far away from ideal one and stability of peptide immunogens is an important  
311 concern and challenge. Although very few studies are available which assess the effect of  
312 temperature on long-term storage of peptide vaccines. For example, a peptide retains its  
313 conformation for a week when incubated at 45°C. ESAT651-70-Q11 showed strong  
314 immunogenic response even after storage at 45 °C for up to 6 months (Sun et al, 2016).  
315 Similarly, in another study, it was observed that mixtures of up to 12 peptides remain stable for  
316 up to 5 years when stored at -20 °C or -80 °C (Kimberly et al. 2009). Another study reported that  
317 anionic gold nanoparticles and PEG (polyethylene glycol) at the concentration of  $10^{-8}$ - $10^{-6}$  M  
318 and  $10^{-7}$ - $10^{-4}$  M respectively increased the half-life of a GFP expressing adenovirus from  
319 ~48 h to 21 days at 37 °C (Maria et al. 2016). All these studies showed that peptide-based  
320 vaccine cannot be stored at room temperature for long period and must require deep freeze (-20  
321 °C or -80 °C) which is an important challenge in developing countries. (Chen et al. 2009; Das  
322 2004). Because of this, the introduction of new thermally stable vaccines that do not rely heavily  
323 on the cold chain has become an important goal (Chen et al. 2009; Kristensen et al. 2011).  
324 Despite this many of the peptide-based vaccines are in different phases of clinical trials  
325 (Weidang et al. 2014).

326 Application of whole recombinant yeast and yeast display clearly overcome many of the  
327 limitations associated with conventional and peptide-based vaccines. And many labs have  
328 already shown the encouraging results involving WRY or YD (Haller et al. 2005; Schiff et al.  
329 2007; Heery et al. 2015; Hudson et al. 2016; Chaft et al. 2014). All these and similar studies  
330 clearly showed the merits of using of whole recombinant yeast-based vaccines. Although several  
331 studies are available which investigate the effect of a different temperature on the stability of  
332 peptide-based vaccine over a different period of storage. But only one study appeared recently  
333 which investigate the amount and the stability of expressed proteins in whole recombinant yeast  
334 for a period of six months (Wang et al. 2018). Further, the same study also showed the way for  
335 the quantification of heterologous proteins that remain in cells even after a year of incubation can  
336 be quantified (Wang et al. 2018).

337 Still the study which investigates the stability of heterologous protein in WRY for period of year  
338 or longer was still missing and therefore this present work tried to fill that important gap in our

339 understanding related to effect of temperature on morphology of yeast cells, stability and level of  
340 heterologous proteins in cellular environment of yeast over a period of a year. Although present  
341 study showed that the heterologous protein expressed in yeast remain intact but make no  
342 comment about the actual amount of antigens that remain in total cell mass even after one year  
343 (logic for checking stability is shown through figure 7A). As far as the amount of expressed  
344 protein is concerned, incorporating the multi-copy of heterologous genes as described elsewhere  
345 (Moon et al. 2016) can take care of this. An important issue which needs to be addressed is  
346 whether the level of antigens which remain in yeast cells (over a period of 1-2 years at the  
347 different temperature) will be able to raise an optimum immune response. The number of cells  
348 that need to be stored at the first hand so that enough amount of antigens remains even after a  
349 year of storage for optimum immune response need to be workout. But present study clearly  
350 makes a point that WRY based vaccine can be transported and distributed even in absence of  
351 cold chain as stationary phase cells are robust enough to keep antigens stable at room  
352 temperature for the duration of transportation and distribution which is not the case with the  
353 peptide-based vaccine in absence of protein stabilizers.

354 Although the present way of checking the stability of a heterologous protein in WRY is good  
355 enough which mainly rely on the intact C-terminal tag and molecular weight markers. But just  
356 position of the fusion protein at expected position (relative to protein marker) and one terminal  
357 tagging is not the best strategy. Therefore, I also proposed a simple strategy for confirming the  
358 completeness of heterologous protein in WRY. This strategy involved tagging of both N and C  
359 terminal of heterologous protein with two different tags (Fig. 7B) and detection of the fusion  
360 protein with both the tags and at the same place in blot inform that expressed protein is intact  
361 from N to C terminus. This strategy was taken from yeast display where the protein of interest is  
362 tagged at both N and C terminal (Boder et al. 1997). Bands detected at two different positions  
363 when detected using antibodies against N and C terminal tags suggested cleavage or degradation  
364 of the heterologous protein.

365 Since few stationary phase cells remain viable even in absence of nutrients, therefore, it is  
366 important to use right yeast strains which are able to enter into stationary phase or G<sub>0</sub> phase for  
367 the long-term stability of immunogen but does not grow on providing nutrients or after  
368 administration into subjects. Further, it is known that the magnitude of immune response  
369 mounted by the application of whole recombinant yeast is independent of the status of yeast cells

370 i.e. whether cells are viable or dead (Franzsoff et al. 2005). Growing of yeast cells to stationary  
371 phase rather than till log or mid-log phase is also advantageous from the commercial point of  
372 view as more number of cells or biomass can be generated from given volume of media. This  
373 will further help in lower down the cost of the vaccine.

374 In conclusion, it can be said that soon yeast-based vaccine will be a reality and strategy like  
375 WRY and YD will be really crucial in realizing the full potential of the yeast-based vaccine. The  
376 cellular environment of yeast appears suitable for keeping the immunogen intact for a long  
377 period when stored under a refrigerated condition or at room temperature. Since OD of cells  
378 decreases over period storage, it is important to study whether the amount of immunogen in cells  
379 will be enough to raise a required immune response. But results of present work will surely  
380 encourage more studies in this direction and it will be further interesting to study the stability of  
381 expressed immunogen at an elevated temperature close to 37-43 °C which is common in tropical  
382 countries of Africa and Asia which require vaccine badly. Again, it will be of utmost importance  
383 to finding out the ways to store immunogen in the cellular environment for at least 1-2 years  
384 even when cells are stored at elevated temperature (37-43 °C). But present study clearly showed  
385 that WRY based vaccine can be transported even under the normal condition without the need  
386 for a continuous chain of refrigeration which is itself of great importance.

### 387 **Acknowledgement**

388 I am thankful to Dr Piyush Kumar for going through the draft and informing about the required  
389 changes in the present manuscript. I am also grateful to UCSD for providing me with the  
390 necessary support for completion of this work.

### 391 **Funding**

392 The author declares that no funding agency to be reported.

### 393 **Authors Contribution**

394 RK conceived, designed, performed the experiments, analyzed the data and wrote the  
395 manuscript.

### 396 **Compliance with ethical standards**

397 **Conflicts of interest**

398 The author declares no conflict of interest of any kind exists.

399 **Ethical approval**

400 This article does not contain any studies with animals performed by any of the authors.

401 **References**

402 Aguilar JC, Rodriguez EG (2007) Vaccine adjuvants revisited. *Vaccine* 25:3752-3762.

403 Ardiani A, Higgins JP, Hodge JW (2010) Vaccines based on whole recombinant  
404 *Saccharomyces cerevisiae* cells. *FEMS Yeast Res*10:1060-9.

405 Bachler BC, Humbert M, Palikuqi B, Siddappa NB, Lakhashe SK, Robert A Rasmussen,  
406 Ruth M Ruprecht (2013) Novel biopanning strategy to identify epitopes associated with  
407 vaccine protection. *J. Virol* 87:4403-4416.

408 Bilusic M, Heery CR, Arlen PM, Rauckhorst M, Apelian D, Tsang KY, Tucker JA, Jochems  
409 C, Schlom J, Gulley JL, Madan RA (2014) Phase I trial of a recombinant yeast-CEA vaccine  
410 (GI-6207) in adults with metastatic CEA-expressing carcinoma. *Cancer Immunol*  
411 *Immunother* 63:225-234.

412 Black M, Trent A, Tirrell M, Olive C (2010) Advances in the design and delivery of peptide  
413 subunit vaccines with a focus on toll-like receptor agonists. *Expert Rev. Vaccines* 9:157-173.

414 Boder ET, Wittrup KD (1997) Yeast surface display for screening combinatorial polypeptide  
415 libraries. *Nat Biotechnol* 15:553-7.

416 Broach JR, Pringle JR, Jones EW (1991) The molecular and cellular biology of the yeast  
417 *Saccharomyces*. Cold Spring Harbor, NY: Cold Spring Harbor Laboratory Press.

418 Chaft JE, Litvak A, Arcila ME, Patel P, D'Angelo SP, Krug LM, Rusch V, Mattson A,  
419 Coeshott C, Park B, Apelian DM, Kris MG, Azzoli CG (2014) Phase II study of the GI-4000  
420 KRAS vaccine after curative therapy in patients with stage I-III lung adenocarcinoma  
421 harboring a KRAS G12C, G12D, or G12V mutation. *Clin Lung Cancer* 15:405-410.

422 Chen D, Kristensen D (2009) Opportunities and challenges of developing thermostable  
423 vaccines. *Expert Rev Vaccines* 8:547-557.

424 Chen X, Fernando GJP, Crichton ML, Flaim C, Yukiko SR, Fairmaid EJ, Corbett HJ,  
425 Primiero CA, Ansaldo AB, Frazer IH, Brown LE, Kendall MA (2011) Improving the reach



426 of vaccines to low-resource regions, with a needle-free vaccine delivery device and long-  
427 term thermos stabilization. *J Controlled Release* 152:349-355.

428 Cox FE (1991) Malaria vaccines-progress and problems. *Trends in Biotechnology* 9:389-394.

429 Das P (2004) Revolutionary vaccine technology breaks the cold chain. *Lancet Infect Dis*  
430 4:719

431 Fang Y, Liu MQ, Chen L, Zhu ZG, Zhu ZR, Hu Q (2016) Rabies post-exposure prophylaxis  
432 for a child with severe allergic reaction to rabies vaccine. *Hum Vaccin Immunother* 12:1802-  
433 1804.

434 Franzusoff A, Duke RC, King TH, Lu Y, Rodell TC (2005) Yeasts encoding tumour antigens  
435 in cancer immunotherapy. *Expert Opin Biol Ther* 5:565-575

436 Gaggar A, Coeshott C, Apelian D, Rodell T, Armstrong BR, Shen G, Subramanian GM,  
437 McHutchison JG (2014) Safety, tolerability and immunogenicity of GS-4774, a hepatitis B  
438 virus-specific therapeutic vaccine, in healthy subjects: a randomized study. *Vaccine* 32:4925-  
439 4931.

440 Gellissen G, Hollenberg CP (1997) Application of yeasts in gene expression studies: a  
441 comparison of *Saccharomyces cerevisiae*, *Hansenula polymorpha* and *Kluyveromyces lactis* –  
442 a review. *Gene* 190:87-97.

443 Güldener U, Heck S, Fielder T, Beinhauer J, Hegemann JH (1996) A new efficient gene  
444 disruption cassette for repeated use in budding yeast. *Nucleic Acids Res* 24:2519-2524.

445 Haller A, King T, Lu Y, Kemmler C, Gordon G, Bellgrau D, Franzusoff A, Rodell T, Duke R  
446 (2005) Whole recombinant yeast-based immunotherapy for treatment of chronic hepatitis C  
447 infection induces dose-dependent T cell responses and therapeutic effects without vector  
448 neutralization [abstract 132]. *Hepatology* 42 (Suppl S1):249A.

449 Heery CR, Singh BH, Rauckhorst M, Marté JL, Donahue RN, Grenga I, Rodell TC, Dahut  
450 W, Arlen PM, Madan RA, Schlom J, Gulley JL (2015) Phase I Trial of a Yeast-Based  
451 Therapeutic Cancer Vaccine (GI-6301) Targeting the Transcription Factor Brachyury.  
452 *Cancer Immunol Res* 3:1248-1256.

453 Hudson LE, McDermott CD, Stewart TP, Hudson WH, Rios D, Fasken MB, Corbett AH,  
454 Lamb TJ (2016) Characterization of the Probiotic Yeast *Saccharomyces boulardii* in the  
455 Healthy Mucosal Immune System. *PLoS One* 11:e0153351.



456 Janke C, Magiera MM, Rathfelder N, Taxis C, Reber S, Maekawa H, Moreno-Borchart A,  
457 Doenges G, Schwob E, Schiebel E, Knop M (2004) Versatile toolbox for PCR-based tagging  
458 of yeast genes: new fluorescent proteins, more markers and promoter substitution cassettes.  
459 *Yeast* 21:947-962.

460 Kimberly A Chianese-Bullock, Sarah TL, Nicholas ES, John DS, Craig LS Jr (2009) Multi-  
461 peptide vaccines vialed as peptide mixtures can be stable reagents for use in peptide-based  
462 immune therapies. *Vaccine* 27:1764-1770.

463 King TH, Guo Z, Hermreck M, Bellgrau D, Rodell TC (2016) Construction and im-  
464 munogenicity testing of whole recombinant yeast-based t-cell vaccines. *Meth. Mol. Biol*  
465 1404:529-545.

466 King TH, Kemmler CB, Guo Z, Mann D, Lu Y, Coeshott C, Gehring AJ, Bertoletti A, Ho  
467 ZZ, Delaney W, Gaggar A, Subramanian GM, McHutchison JS, Shrivastava S, Lee YJ,  
468 SKottlilil S, Bellgrau D, Rodell T, Apelian D (2014) A whole recombinant yeast-based  
469 therapeutic vaccine elicits HBV X, S and Core specific T cells in mice and activates human T  
470 cells recognizing epitopes linked to viral clearance. *PLoS One* 9: e101904.

471 Kristensen D, Chen D, Cummings R (2011) Vaccine stabilization: Research,  
472 commercialization, and potential impact. *Vaccine* 29:7122–7124.

473 Kumar R, Dhali S, Srikanth R, Ghosh SK, Srivastava S (2014) Comparative proteomics of  
474 mitosis and meiosis in *Saccharomyces cerevisiae*. *J Proteomics* 109:1-15.

475 Kumar R, Srivastava S (2016) Quantitative proteomic comparison of stationary/G0 phase  
476 cells and tetrads in budding yeast. *Sci Rep* 6:32031.

477 Loferer H, Hammar M, Normark S (1997) Availability of the fibre subunit CsgA and the  
478 nucleator protein CsgB during assembly of fibronectin-binding curli is limited by the  
479 intracellular concentration of the novel lipoprotein CsgG. *Mol Microbiol* 26:11-23.

480 Lok AS, Pan CQ, Han SH, Trinh HN, Fessel WJ, Rodell T, Massetto B, Lin L, Gaggar A,  
481 Subramanian GM, McHutchison JG, Ferrari C, Lee H, Gordon SC, Gane EJ (2016)  
482 Randomized phase II study of GS-4774 as a therapeutic vaccine in virally suppressed  
483 patients with chronic hepatitis B. *J Hepatol* 65:509-516.

484 Longtine MS, McKenzie A, Demarini DJ, Shah NG, Wach A, Brachat A, Philippsen P,  
485 Pringle JR (1998) Additional modules for versatile and economical PCR-based gene deletion  
486 and modification in *Saccharomyces cerevisiae*. *Yeast* 14:953-961.

487 Lorry G Rubin, Myron J Levin, Per Ljungman, Graham Davies E, Robin Avery, Tomblyn M,  
488 Bousvaros A, Dhanireddy S, Sung L, Keyserling H, Kang I (2014) 2013 IDSA Clinical  
489 Practice Guideline for Vaccination of the Immunocompromised Host. *Clin Infect Dis* 58:309-  
490 318.

491 Luo G, Gebremariam T, Clemons KV, Stevens DA, Ibrahim AS (2014) Heat-killed yeast  
492 protects diabetic ketoacidotic-steroid treated mice from pulmonary mucormycosis. *Vaccine*  
493 32:3573-3576.

494 Maria P, Patrizia A, Jayson P, Marco D'A, Valeria C, Manuela D , Andrea C, Rebecca MB,  
495 Nicole H, Paulo JS, Randy PC, Varpu M, Daniel NS, David L, Francesco S, Vincenzo V,  
496 Silke K (2016) Additives for vaccine storage to improve thermal stability of adenoviruses  
497 from hours to months. *Nat. Commun* 7:13520.

498 Martinez MJ, Roy S, Archuletta AB, Wentzell PD, Anna-Arriola SS, Rodriguez AL, Aragon  
499 AD, Quiñones GA, Allen C, Werner-Washburne M (2004) Genomic analysis of stationary-  
500 phase and exit in *Saccharomyces cerevisiae*: gene expression and identification of novel  
501 essential genes. *Mol Biol Cell* 15:5295-305.

502 Moon HY, Lee DW, Sim GH, Kim HJ, Hwang JY, Kwon MG, Kang BK, Kim JM, Kang HA  
503 (2016) A new set of rDNA-NTS-based multiple integrative cassettes for the development of  
504 antibiotic-marker-free recombinant yeasts. *J Biotechnol* 233:190-199

505 Narasimhan M, Ahmed PB, Venugopal V, Karthikeyan S, Gnanaraj P, Rajagopalan V (2015)  
506 Severe allergic eczematous skin reaction to 2009 (H1N1) influenza vaccine injection. *Int J*  
507 *Dermatol* 54:1340-1341.

508 Olsén A, Wick MJ, Mörgelin M, Björck L (1998) Curli, fibrous surface proteins of  
509 *Escherichia coli*, interact with major histocompatibility complex class I molecules- *Infection*  
510 and immunity 66:944-949.

511 Pastoret PP (1999) Veterinary vaccinology. *Comptes Rendus De L Academie Des Sciences*  
512 *Serie III-Sciences De La Vie-Life Sciences* 322: 967-972.

513 Perrie Y, Kirby D, Bramwell VW, Mohammed AR (2007) Recent developments in  
514 particulate-based vaccines. *Recent Pat. Drug Deliv. Formul* 1:117-129.

515 Purcell AW, McCluskey J, Rossjohn J (2007) More than one reason to rethink the use of  
516 peptides in vaccine design. *Nat. Rev. Drug Discov* 6:404-414.

517 Reddy PJ, Aishwarya AR, Malhotra D, Sharma S, Kumar R, Jain R, Gollapalli K,  
518 Pendharkar N, Srikanth R, Srivastava S (2013) A Simple TRIzol Protein Extraction Method  
519 For 2-DE, DIGE and MS Analysis of Diverse Samples. *Curr. Proteomics* 10:298-311.

520 Reddy PJ, Ray S, Sathe GJ, Gajbhiye A, Prasad TS, Rapole S, Panda D, Srivastava S (2015)  
521 A comprehensive proteomic analysis of totarol induced alterations in *Bacillus subtilis* by  
522 multipronged quantitative proteomics. *J of Proteomics* 114:247-262.

523 Rose AH, Harrison JS (1987) *The yeasts*. 2nd ed. London/San Diego: Academic Press.

524 Ross PL, Huang YN, Marchese JN, Williamson B, Parker K, Hattan S, Khainovski N, Pillai  
525 S, Dey S, Daniels S, Purkayastha S, Juhasz P, Martin S, Bartlett-Jones M, He F, Jacobson A,  
526 Pappin DJ (2004) Multiplexed protein quantitation in *Saccharomyces cerevisiae* using  
527 amine-reactive isobaric tagging reagents. *Mol. Cell Proteomics* 3:1154-1169.

528 Schiff ER, Everson GT, Tsai N, Bzowej RN, H, G, Gish HG, McHutchison JG (2007) HCV-  
529 specific cellular immunity, RNA reductions, and normalization of ALT in chronic HCV  
530 subjects after treatment with GI-5005, a yeast- based immunotherapy targeting NS3 and core:  
531 a randomized, double-blind, placebo controlled phase 1b study [abstract 1304]. *Hepatology*  
532 46 (Suppl S1): 816A.

533 Scollard DM, Adams LB, Gillis TP, Krahenbuhl JL, Truman RW, Williams DL (2006) The  
534 Continuing Challenges of Leprosy. *Clin Microbiol Rev* 9:338-381.

535 Shams H (2005) Recent developments in veterinary vaccinology. *Veterinary Journal* 170:  
536 289-299.

537 Shibasaki S, Ueda M (2016) Oral Vaccine Development by Molecular Display Methods  
538 Using Microbial Cells. *Methods Mol Biol* 1404:497-509.

539 Strathern JN, Jones EW, Broach JR (1982) *The molecular biology of the yeast*  
540 *Saccharomyces: metabolism and gene expression*. Cold Spring Harbor, N.Y.: Cold Spring  
541 Harbor Laboratory.

542 Stubbs AC, Martin KS, Coeshott C, Skaates SV, Kuritzkes DR, Bellgrau D, Franzusoff A,  
543 Duke RC, Wilson CC (2001) Whole recombinant yeast vaccine activates dendritic cells and  
544 elicits protective cell-mediated immunity. *Nat. Med* 7:625-629.

545 Sun T, Han H, Hudalla GA, Wen Y, Pompano RR, Collier JH (2016) Thermal stability of  
546 self-assembled peptide vaccine materials. *Acta Biomater* 30:62-71.

547 Valenzuela P, Medina A, Rutter WJ, Ammerer G, Hall BD (1982) Synthesis and assembly of  
548 hepatitis B virus surface antigen particles in yeast. *Nature* 298:347-350.

549 Walker GM (1998) *Yeast physiology and biotechnology*. Chichester, New York: J. Wiley &  
550 Sons.

551 Wang J, Stenzel D, Liu A, Liu D, Brown D, Ambrogelly A (2018) Quantification of a  
552 recombinant antigen in an immuno-stimulatory whole yeast cell-based therapeutic vaccine.  
553 *Anal Biochem* 545:65-71.

554 Weidang Li, Medha D. Joshi, Smita Singhania, Kyle H Ramsey, Ashlesh K. Murthy (2014)  
555 *Peptide Vaccine: Progress and Challenges*. *Vaccines (Basel)* 2:515-536.

## 556 **Legends**

557 **Figure 1. Schematic showing the basic work flow of present study.**

558 **Figure 2. Expression of CsgA-GFP in yeast.** (A) The nucleotide sequence of curlin major of *E.*  
559 *coli* along with accession number as given in NCBI. (B) A amino acid sequence of curlin  
560 major/CsgA. (C) Agarose gel showing PCR amplification of curlin gene from *E. coli* genome  
561 (left panel), (D) release of CsgA-GFP cassette from the p1 plasmid which was introduced in an  
562 empty vector having GAP promoter to generate p2 plasmid. Cartoon presentation of map of  
563 plasmid (E) p1 and (F) p2 respectively. Note in cartoon presentation only essential elements of  
564 plasmids are shown while primers and restriction enzymes used in the construction of these  
565 plasmids are mentioned in the text at an appropriate place. (G) Expression of CsgA-GFP from p2  
566 integrated into the genome of wild-type BY4742.

567 **Figure 3. Checking stationary phase in yeast cells.** (A) Growth curve of BY4742 expressing  
568 CsgA-GFP in three-set (biological triplicate). (B) FACS analysis of cells after 15 days of growth  
569 in stationary phase. FACS was performed on all three sets along with control normal cycling cell  
570 (overnight culture). (C) Checking the viability of cells after 3 months for both cells stored at 2-8  
571 °C (middle panel), for cells stored at 23-25 °C (right panel) along with control regular cycling  
572 cells (overnight grown culture) (left panel).

573 **Figure 4. Stability of CsgA-GFP in stationary phase yeast cells.** (A) The decrease in OD of  
574 cells stored over the period of 12 months under the refrigerated condition and at room  
575 temperature. Note experiment was performed in biological triplicate, data is shown for one set,  
576 other two set also followed the similar trend. (B) Morphology of cells after one year when stored  
577 at 2-8 °C (middle panel), when stored at 23-25 °C (right panel) along with morphology of cells

578 just before storage (left panel). Comparison of the level of CsgA-GFP between equal OD of cells  
579 stored at 23-25 °C (C) and stored at 2-8 °C (D) for a duration of one year with that of overnight  
580 grown culture. Complete Ponceau S stained blot (E, F) for western blot shown in figure C and D  
581 respectively. Histogram showing the intensity of bands (G, H) for blot image C and D  
582 respectively.

583 **Figure 5. Comparison of CsgA in cells stored at the different temperature.** (A) Comparison  
584 of the level of CsgA-GFP in cells stored at 23-25 °C (left) and 2-8 °C (right) for a duration of  
585 one year. (B) Complete Ponceau stain blot image of western blot shown in figure A. (C)  
586 Histograms showing comparative level of CsgA-GFP signal calculated from blot image A. (D)  
587 Level of CsgA in cells stored at 23-25 °C (114,116) and those stored at 2-8 °C (label 115,117) as  
588 shown by relative intensity of iTRAQ reporter ions. Note in all the western blot protein level was  
589 normalized based on the number of cells while in case of iTRAQ, protein in cell lysate was  
590 normalized based on protein quantification values.

591 **Figure 6. The viability of stationary phase yeast cells.** The viability of stationary phased cells  
592 after one year of storage (A) at 23-25 °C (right panel) and (B) at 2-8 °C (right panel) compared  
593 to control cycling cells (left panel). (C) Cell viability as checked by vital dye trypan blue for both  
594 cells stored at 23-25 °C and 2-8 °C compared to control (normal cycling cells).

595 **Figure 7. Schematic showing stability of heterologous fusion protein in yeast.** (A) Data from  
596 present work in which fusion of CsgA and GFP i.e. CsgA-GFP remains intact suggests that  
597 expressed heterologous fusion protein remains intact (here intact means complete amino acid  
598 sequence without making comment on the conformation of a protein or its structural integrity).  
599 (B) Proposed strategy for checking intactness of heterologous protein in whole recombinant  
600 yeast using simple western blot by detecting fusion protein using antibodies against N and C  
601 terminal tags.



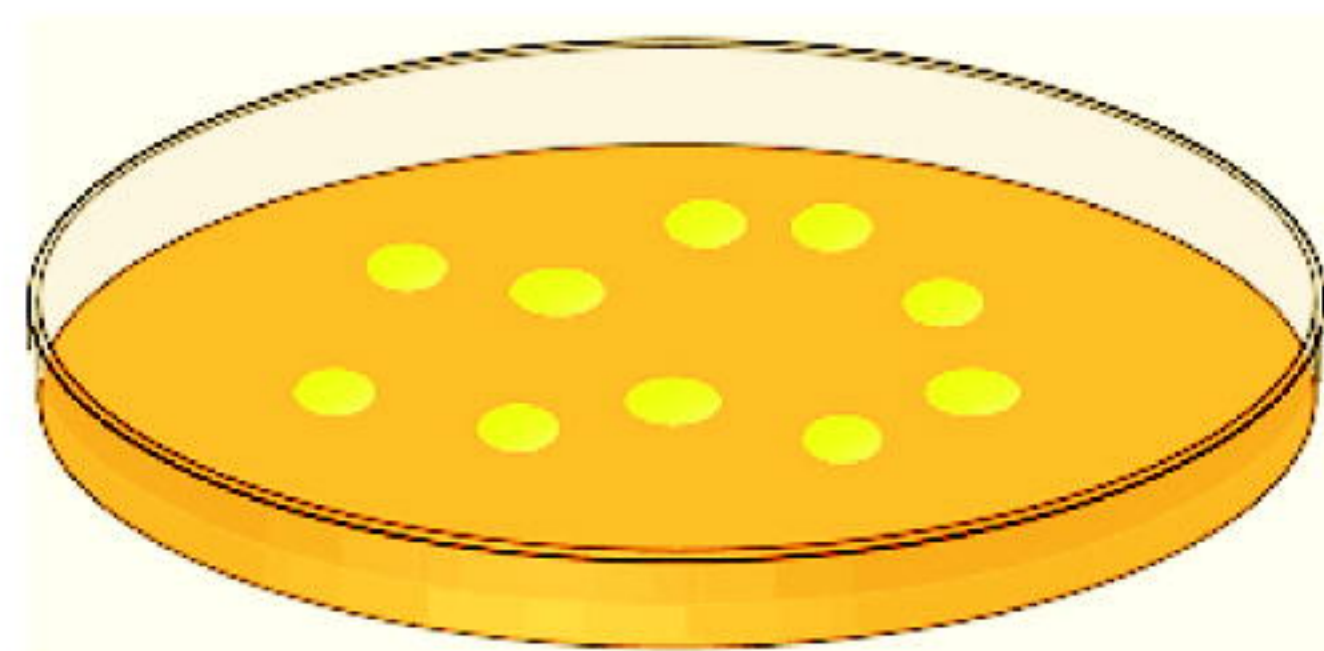

Yeast strain expressing CsgA-GFP

Triplicate culture

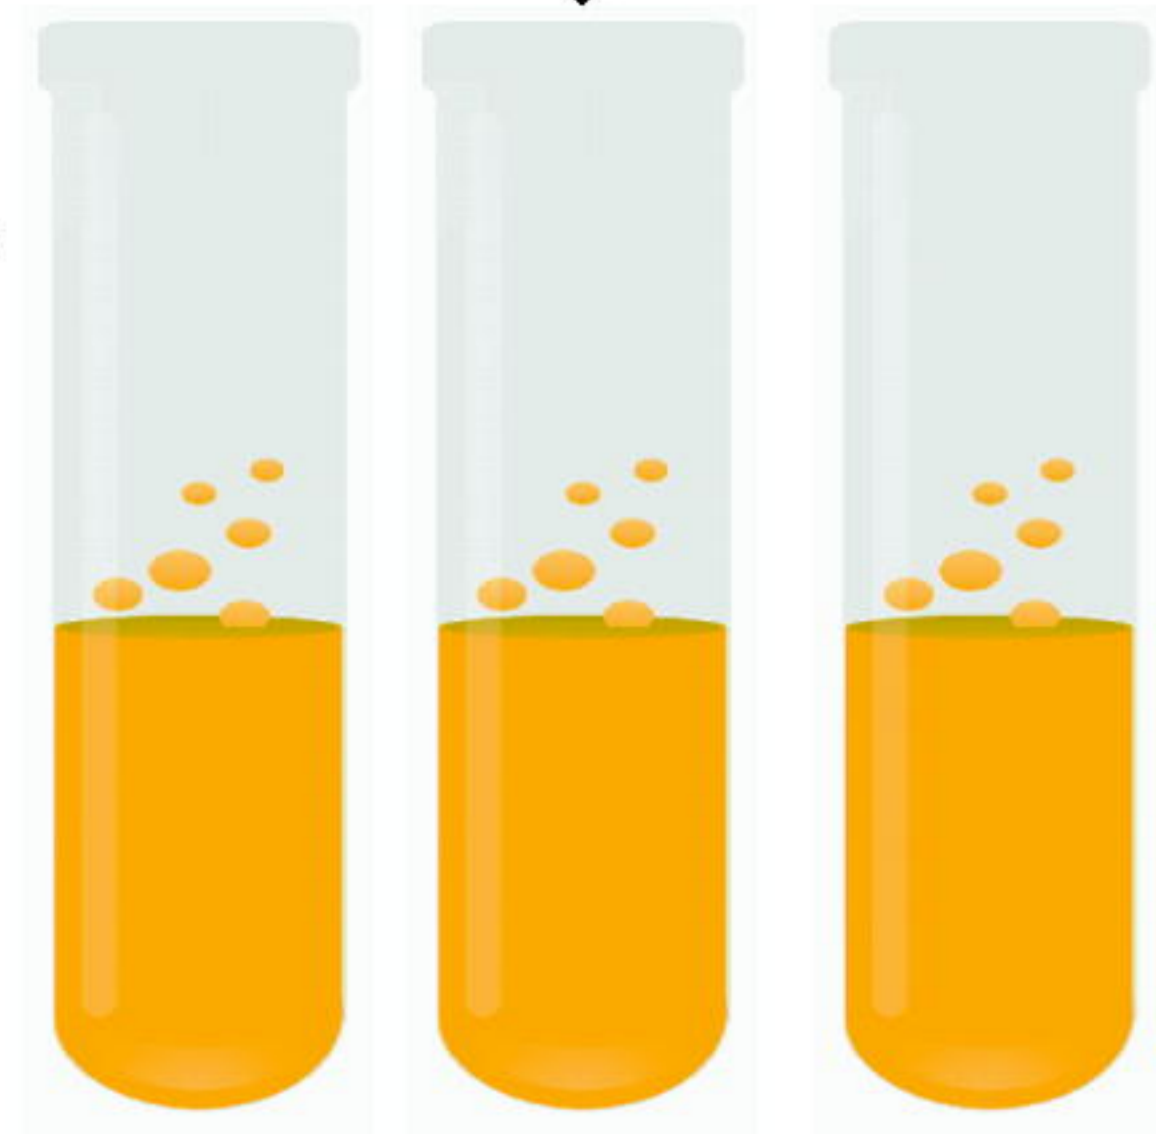

Overnight growth in 5 mL YPD (pre-culture)

Growth till stationary phase

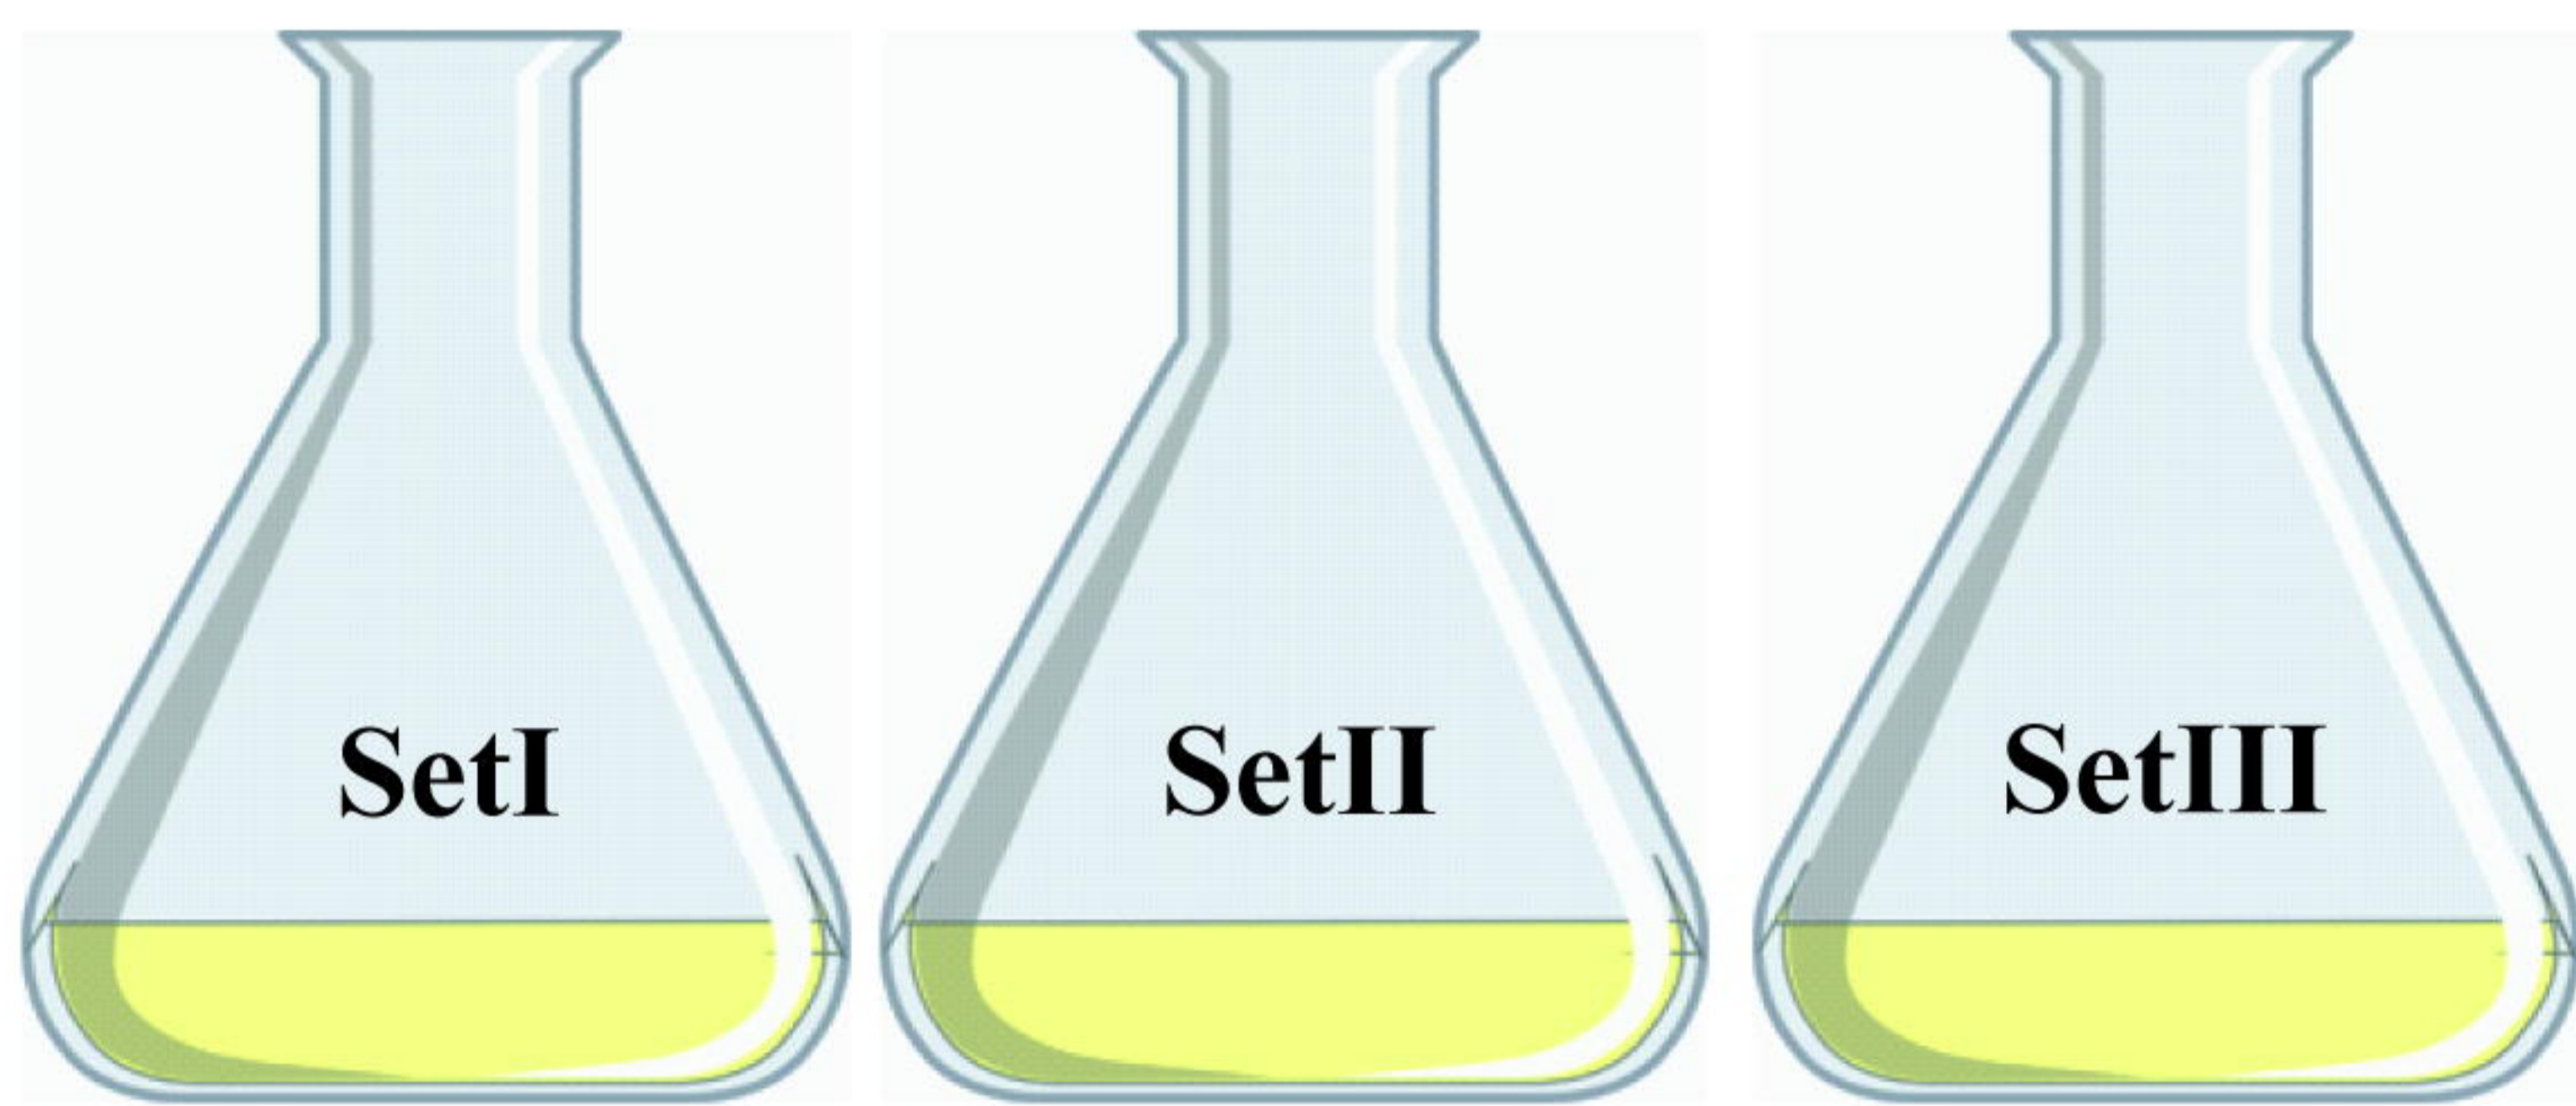

Storage at 2-8 °C

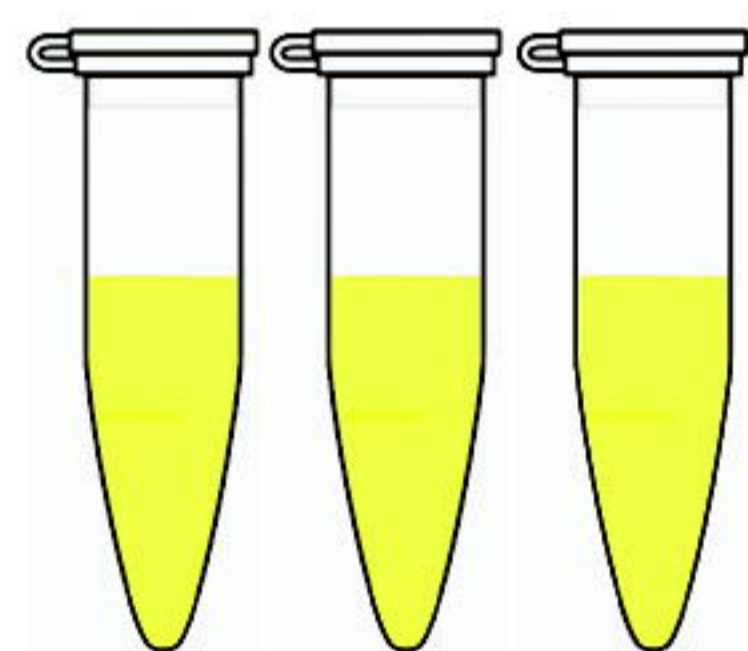

23-25 °C (or RT)

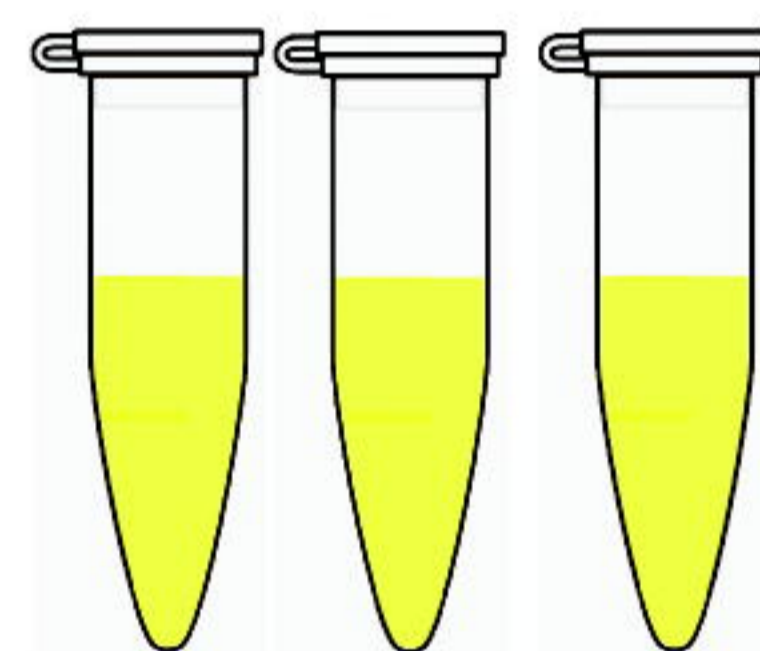

2-8 °C

23-25 °C

Initial Day

12th Month

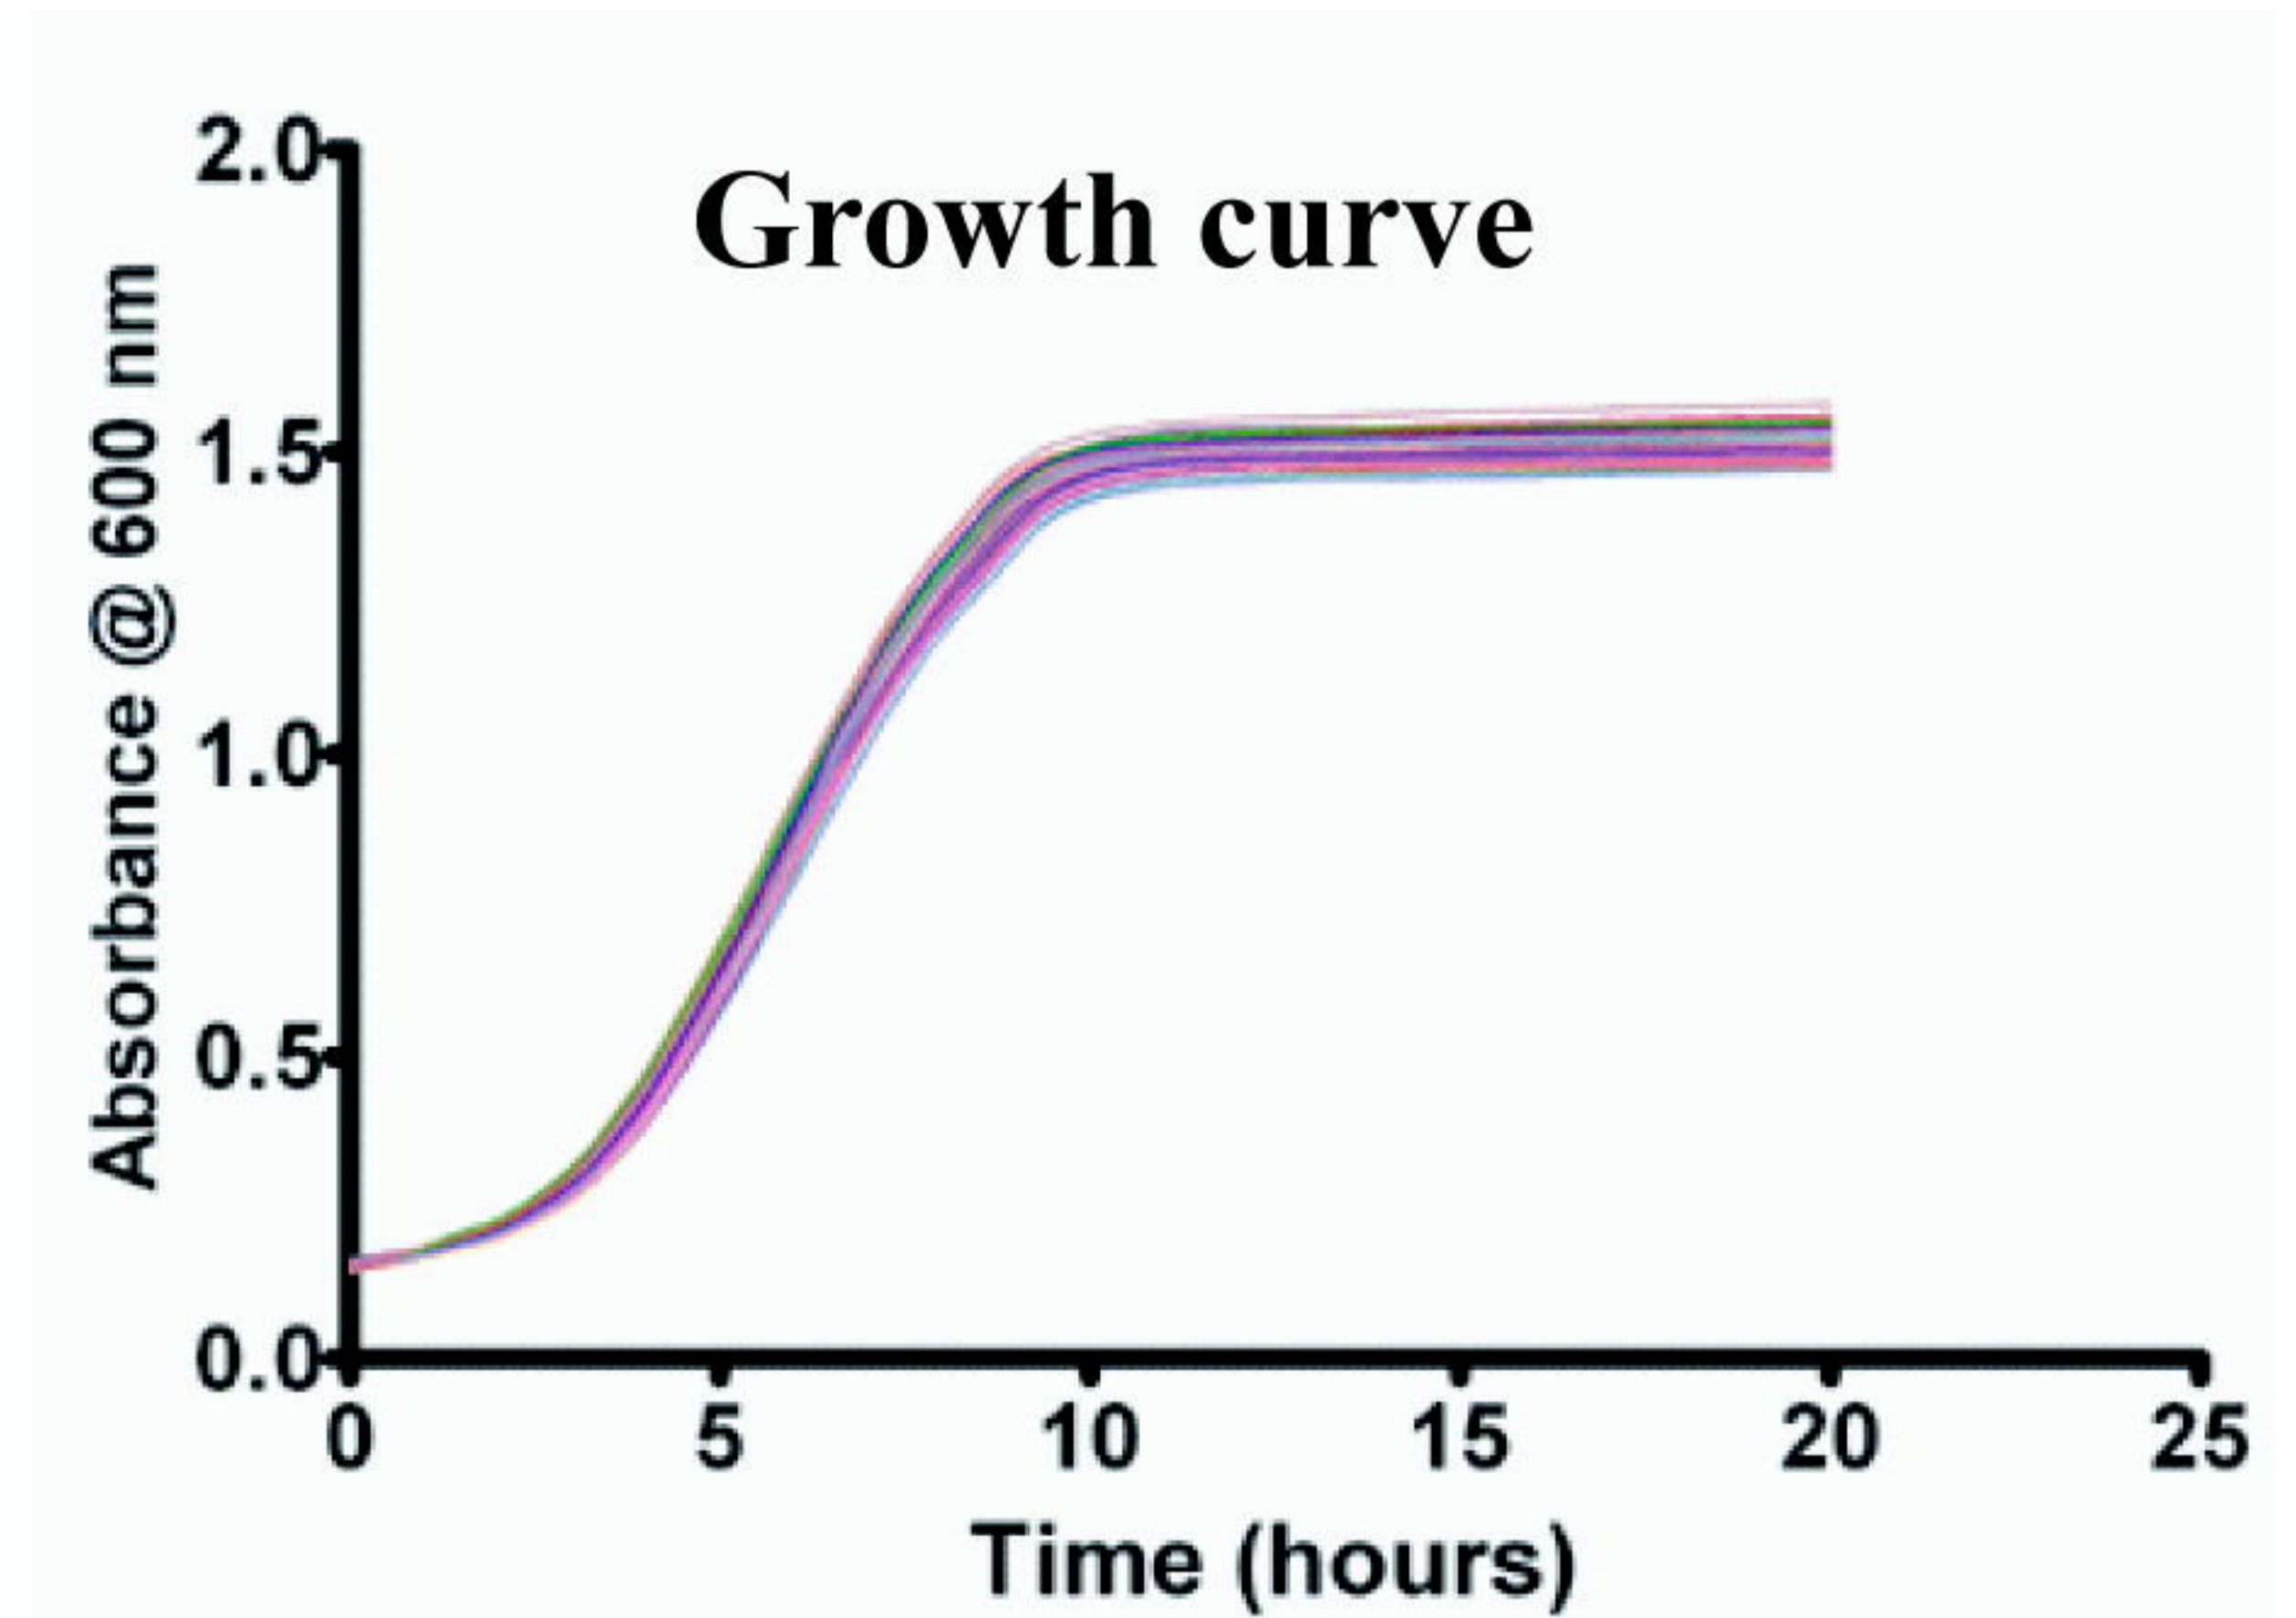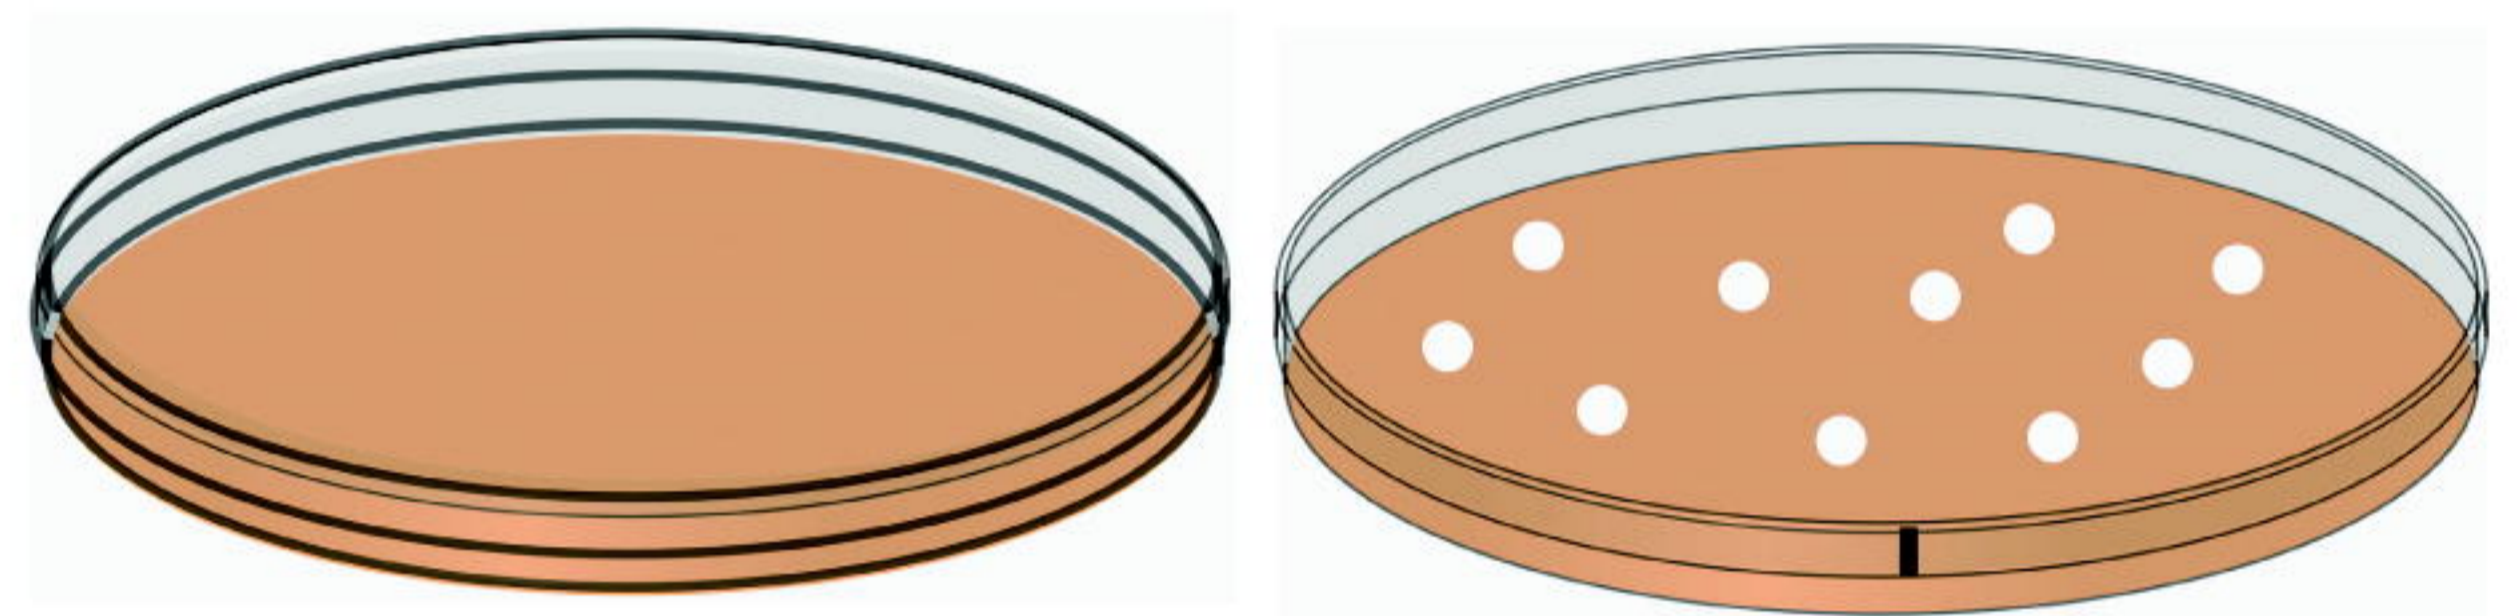

Cell viability assay

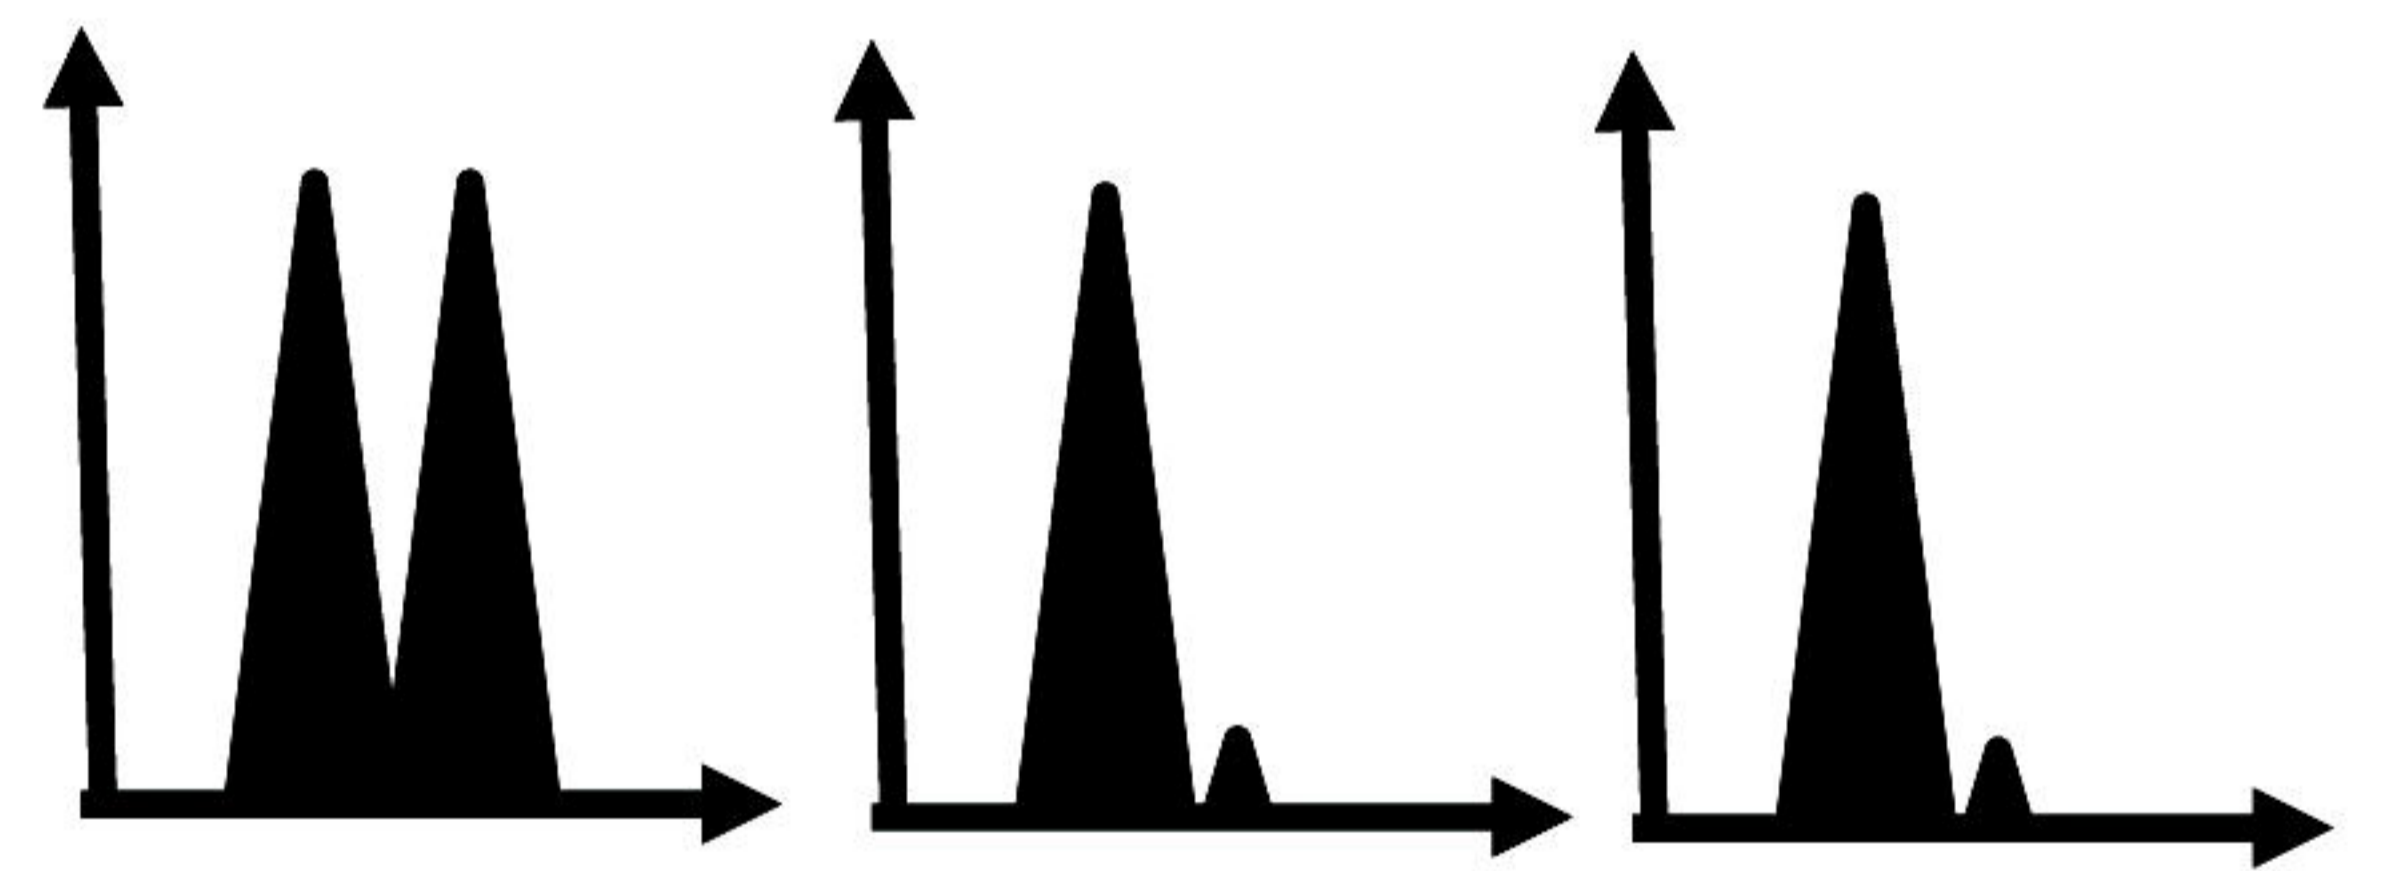

FACS analysis of stationary phase cells

Confirmation of stationary phase by different ways

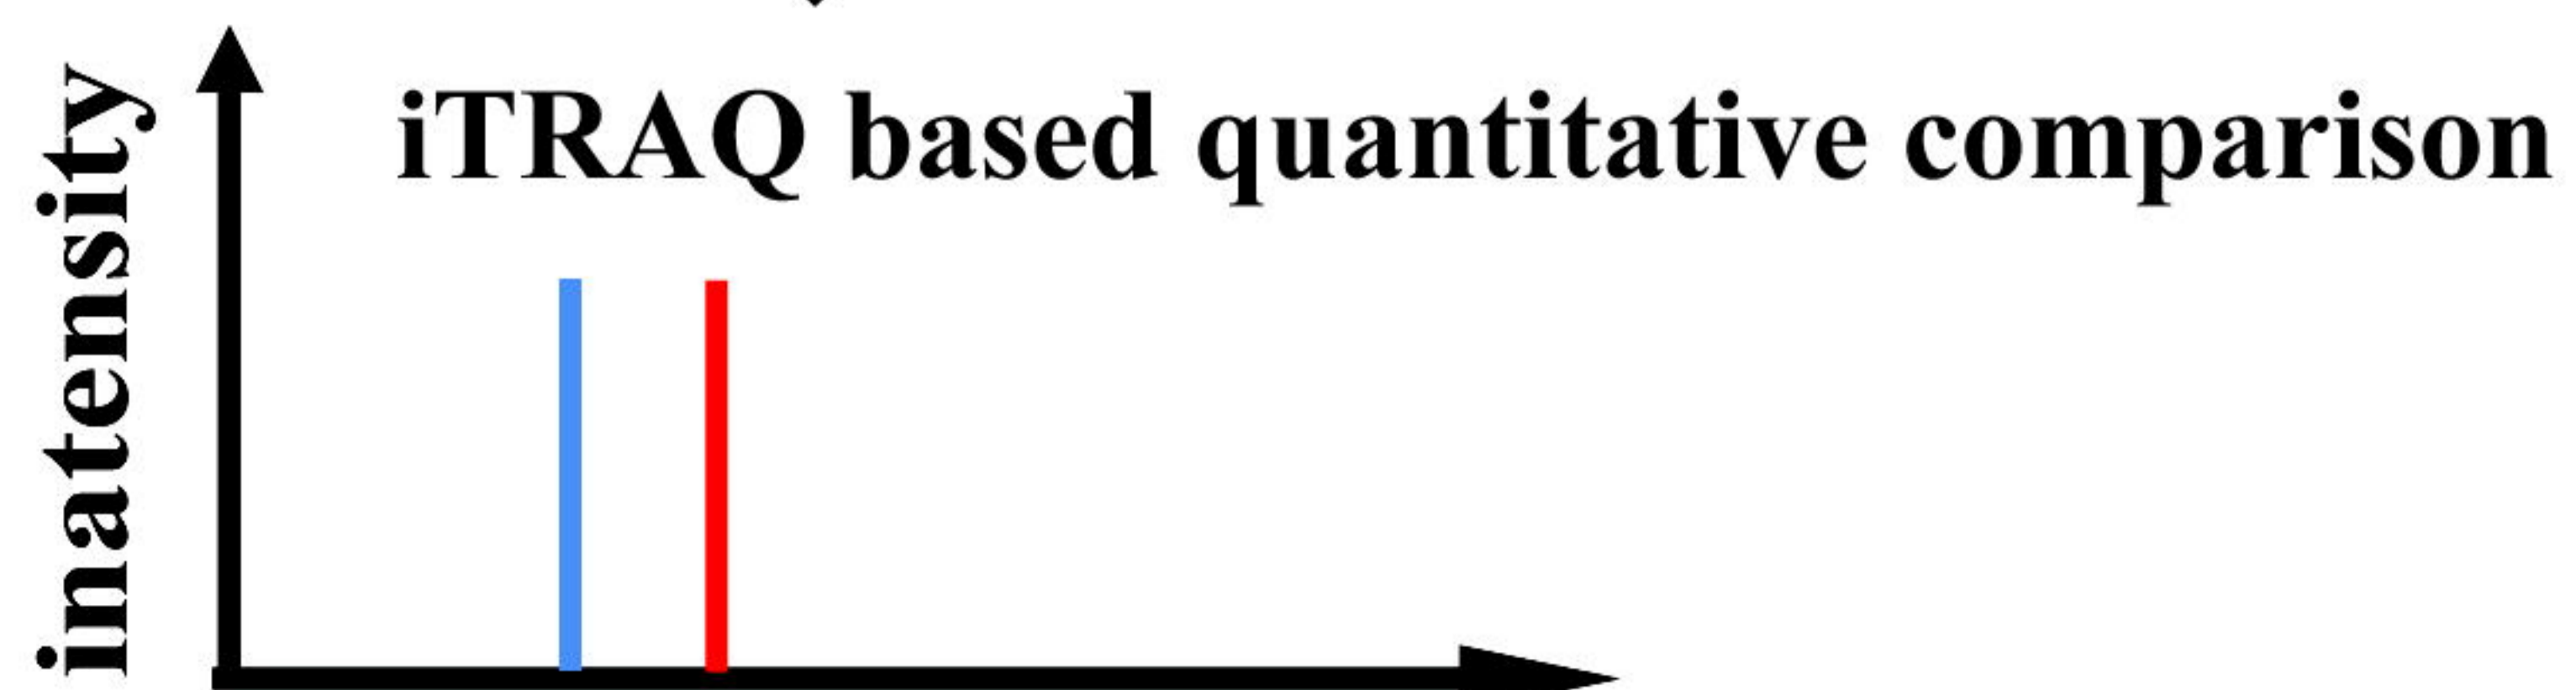



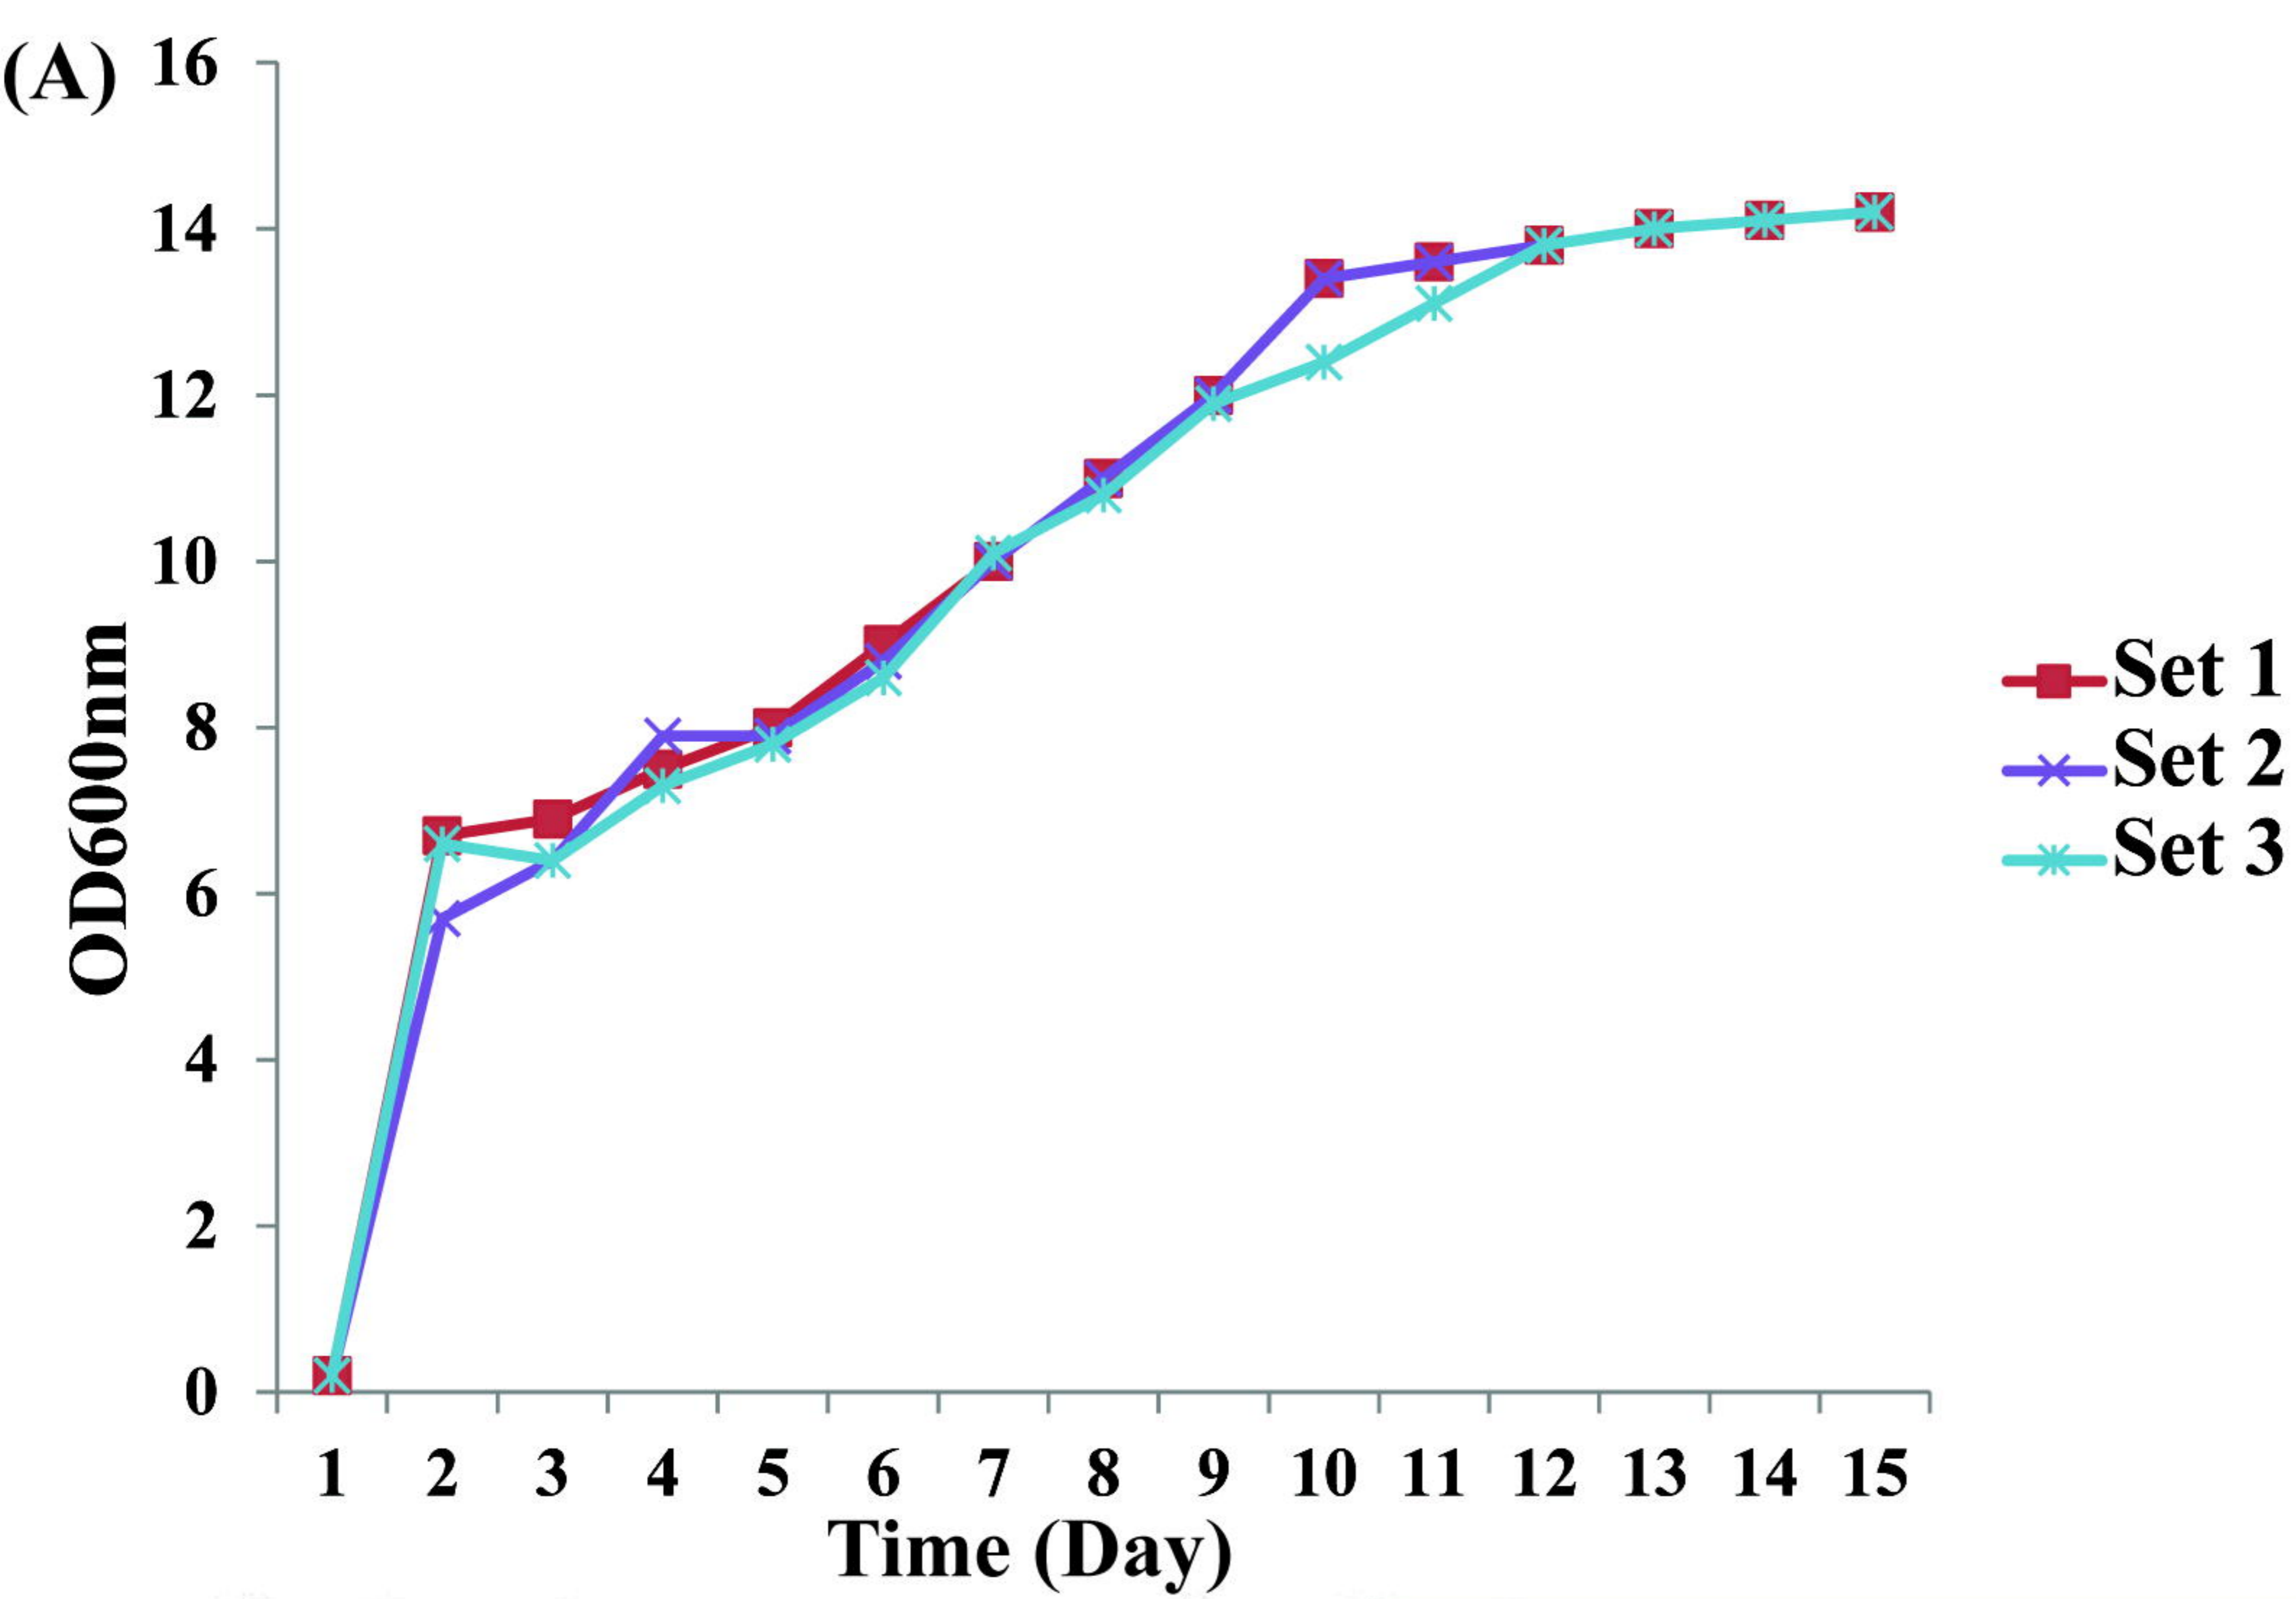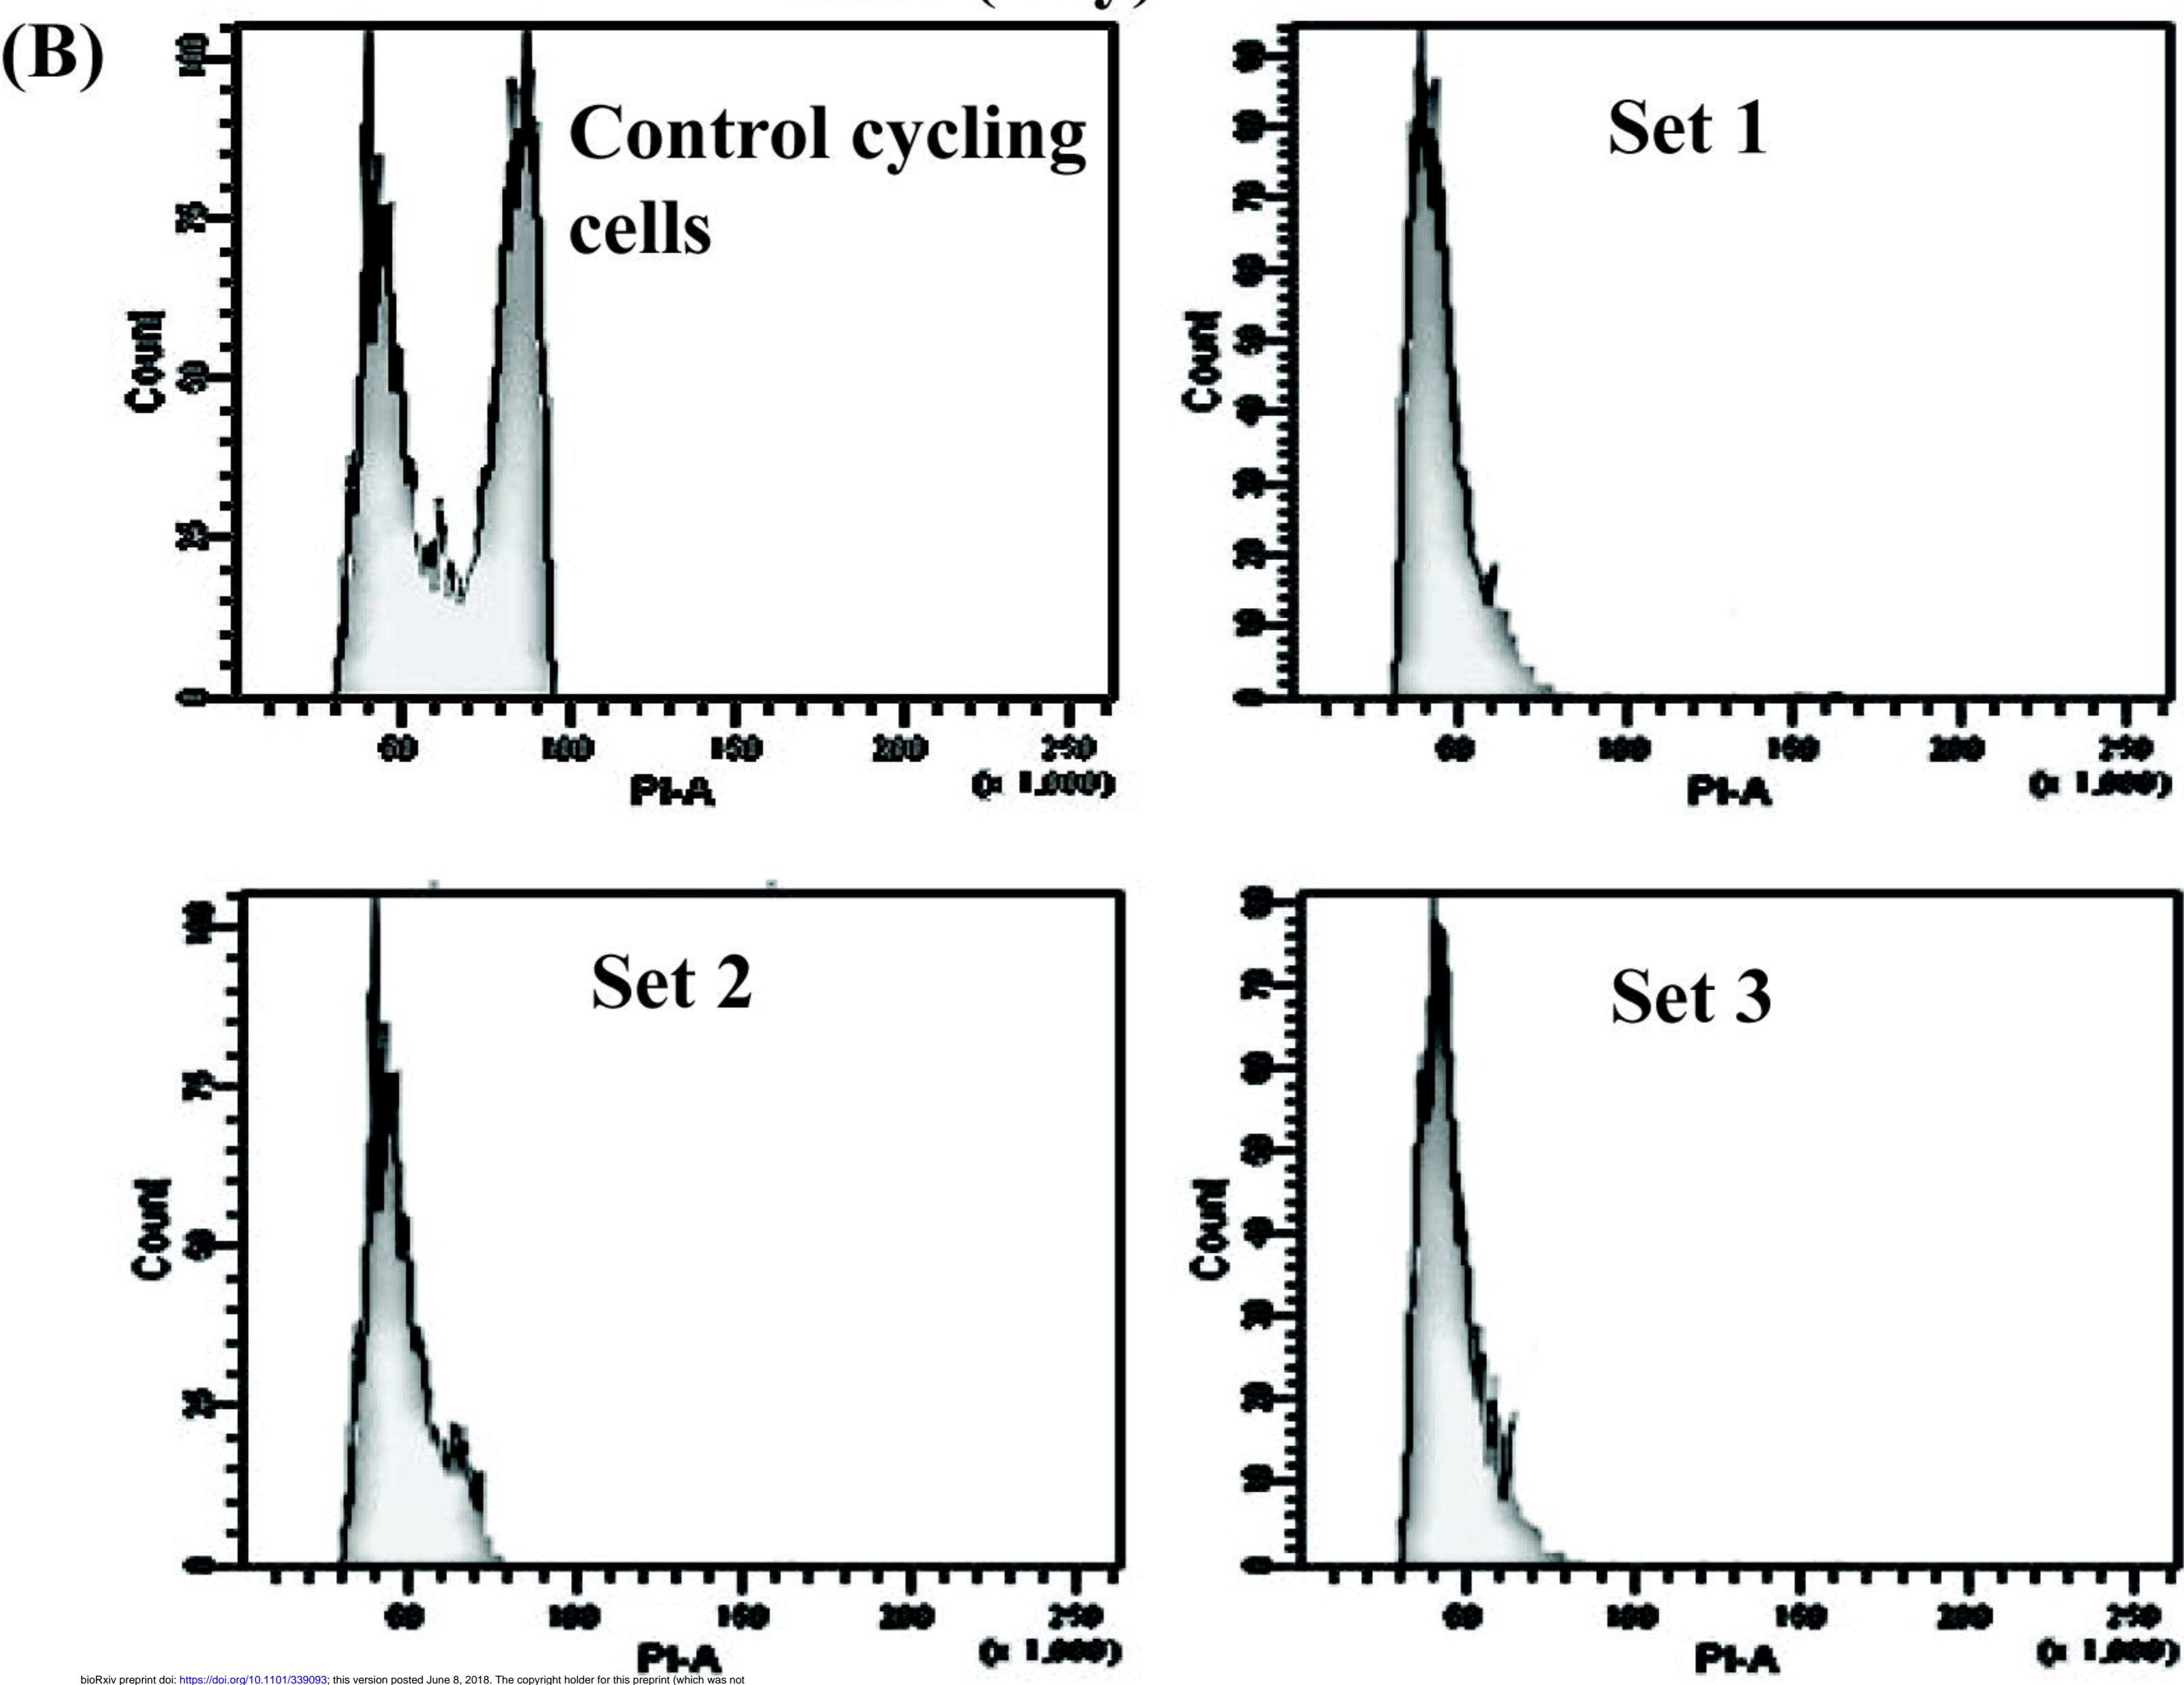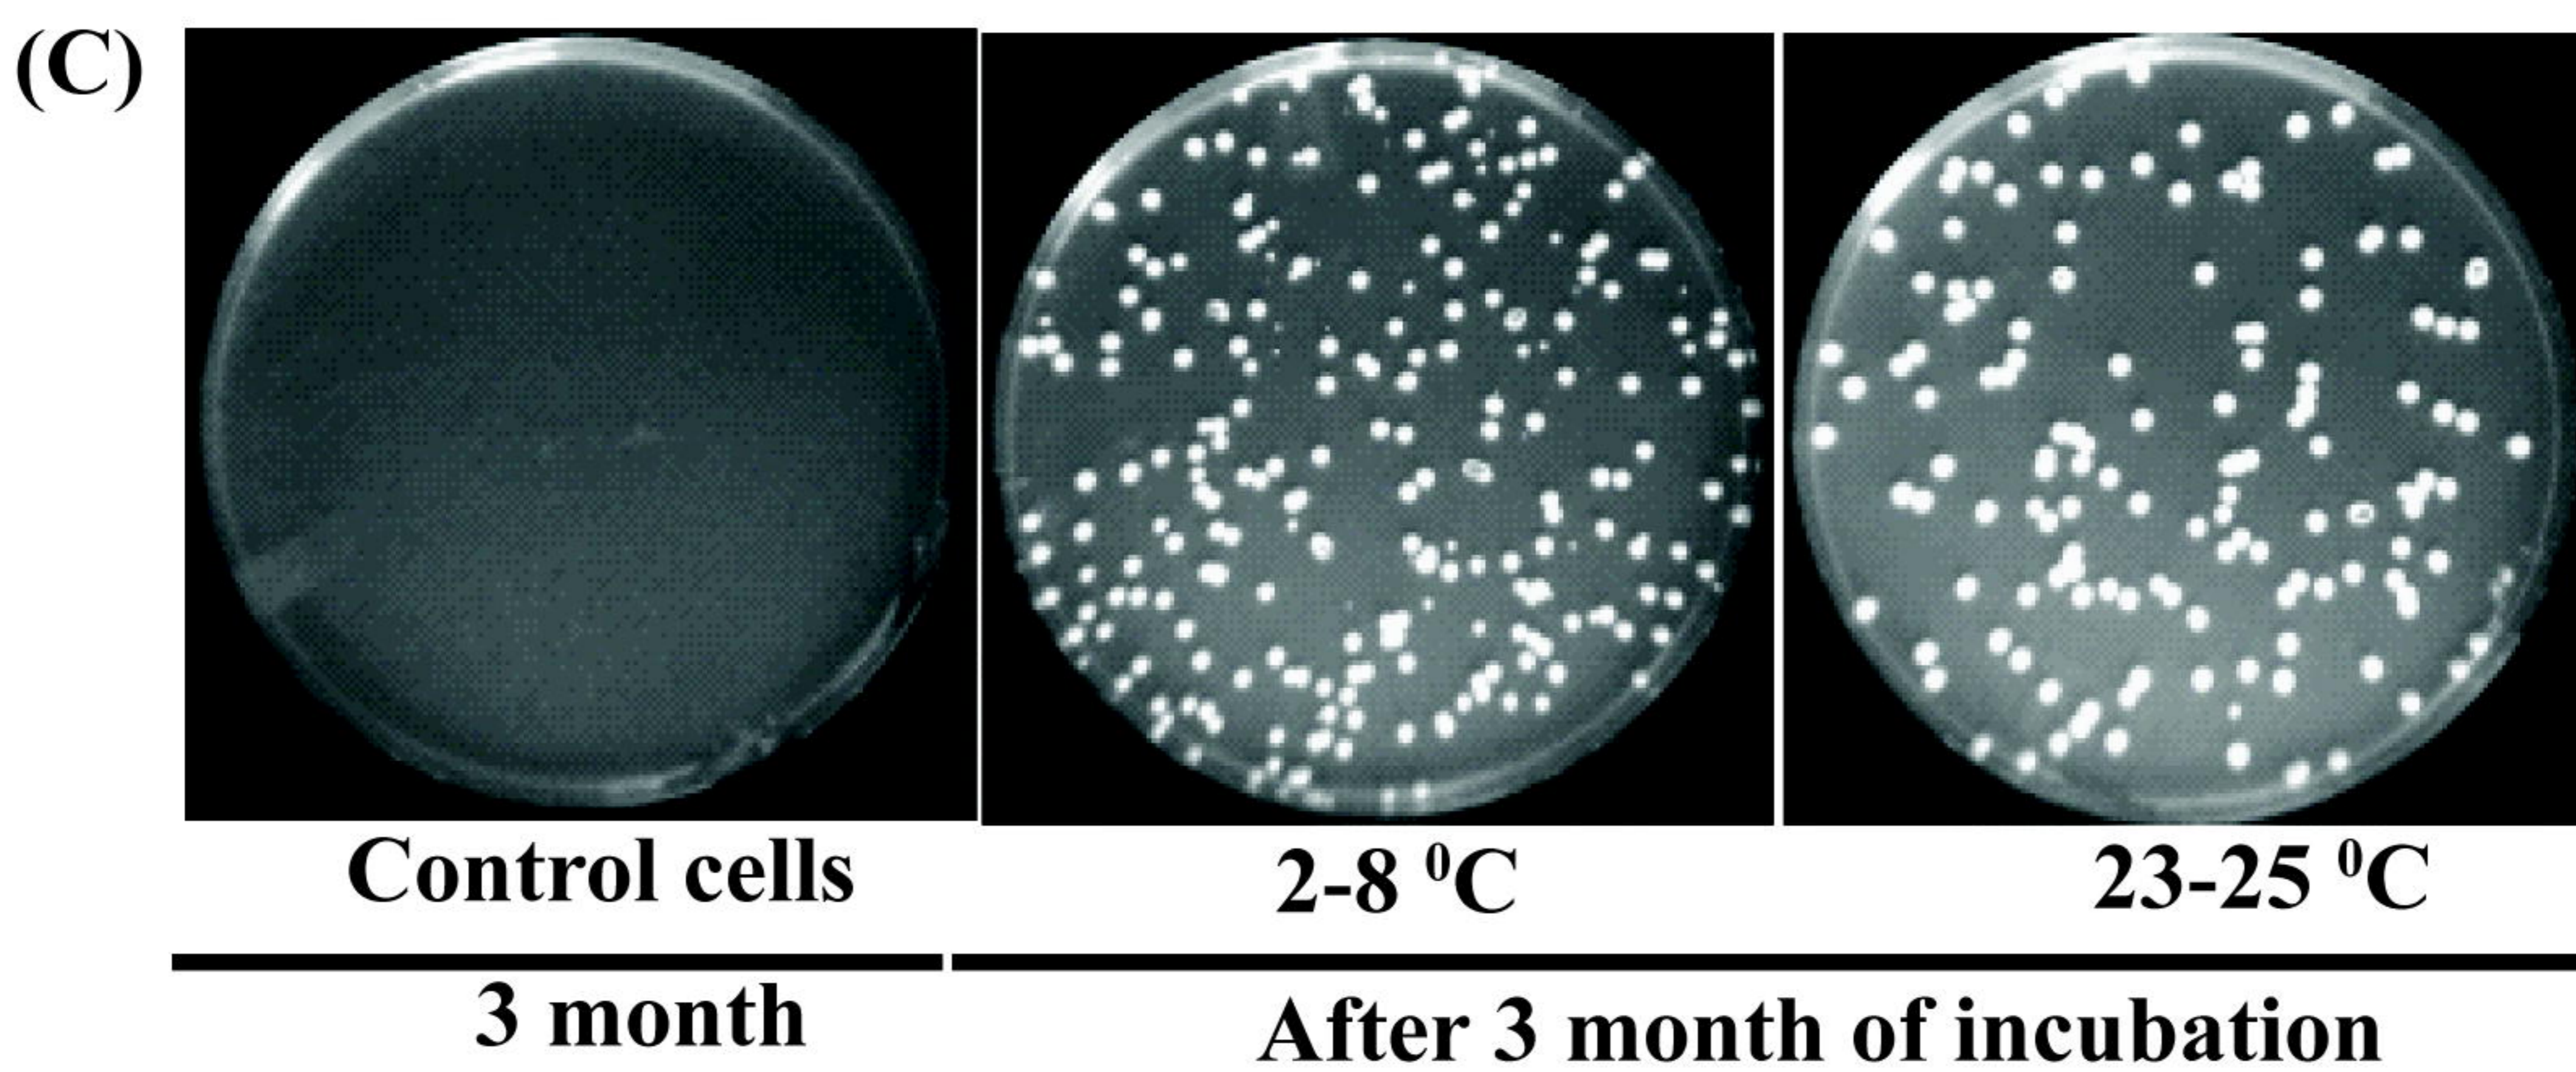



(A) NC\_000913.3:1104447-1104902 *Escherichia coli* str. K-12  
 ATGAAACTTTTAAAAGTAGCAGCAATTGCAGCAATCGTATTCTCCGGTAGCGCTCTGGCAGGTGTTGTTC  
 CTCAGTACGGCGGGCGGGCGGTAACCACGGTGGTGGCGGTAATAATAGCGGCCCAAATTCTGAGCTGAACAT  
 TTACCAGTACGGTGGCGGTA ACTCTGCACTTGCTCTGCAA ACTGATGCCCGTA ACTCTGACTTGACTATT  
 ACCCAGCATGGCGGGCGGTAATGGTGCAGATGTTGGTCAGGGCTCAGATGACAGCTCAATCGATCTGACCC  
 AACGTGGCTTCGGTAACAGCGCTACTCTTGATCAGTGGAACGGCAAAAATTCTGAAATGACGGTTAAACA  
 GTTCGGTGGTGGCAACGGTGGCTGCAGTTGACCAGACTGCATCTAACTCCTCCGTCAACGTGACTCAGGTT  
 GGCTTTGGTAACAACGCGACCGCTCATCAGTACTAA

(B) ACB59300.1 CsgA/curlin major *Escherichia coli*  
 MKLLKVAIAAIVFSGSALAGVVPQYGGGGGNHGGGGNNSGPNSELNIYQYGGGNSALALQADARNSDLT  
 ITQHGGGNGADVGGQSDSSIDLTQRGFGNSATLDQWNGKDSHMTVKQFGGGNGAAVDQTASNSTVNVVTQ  
 VGFGNNATAHQY

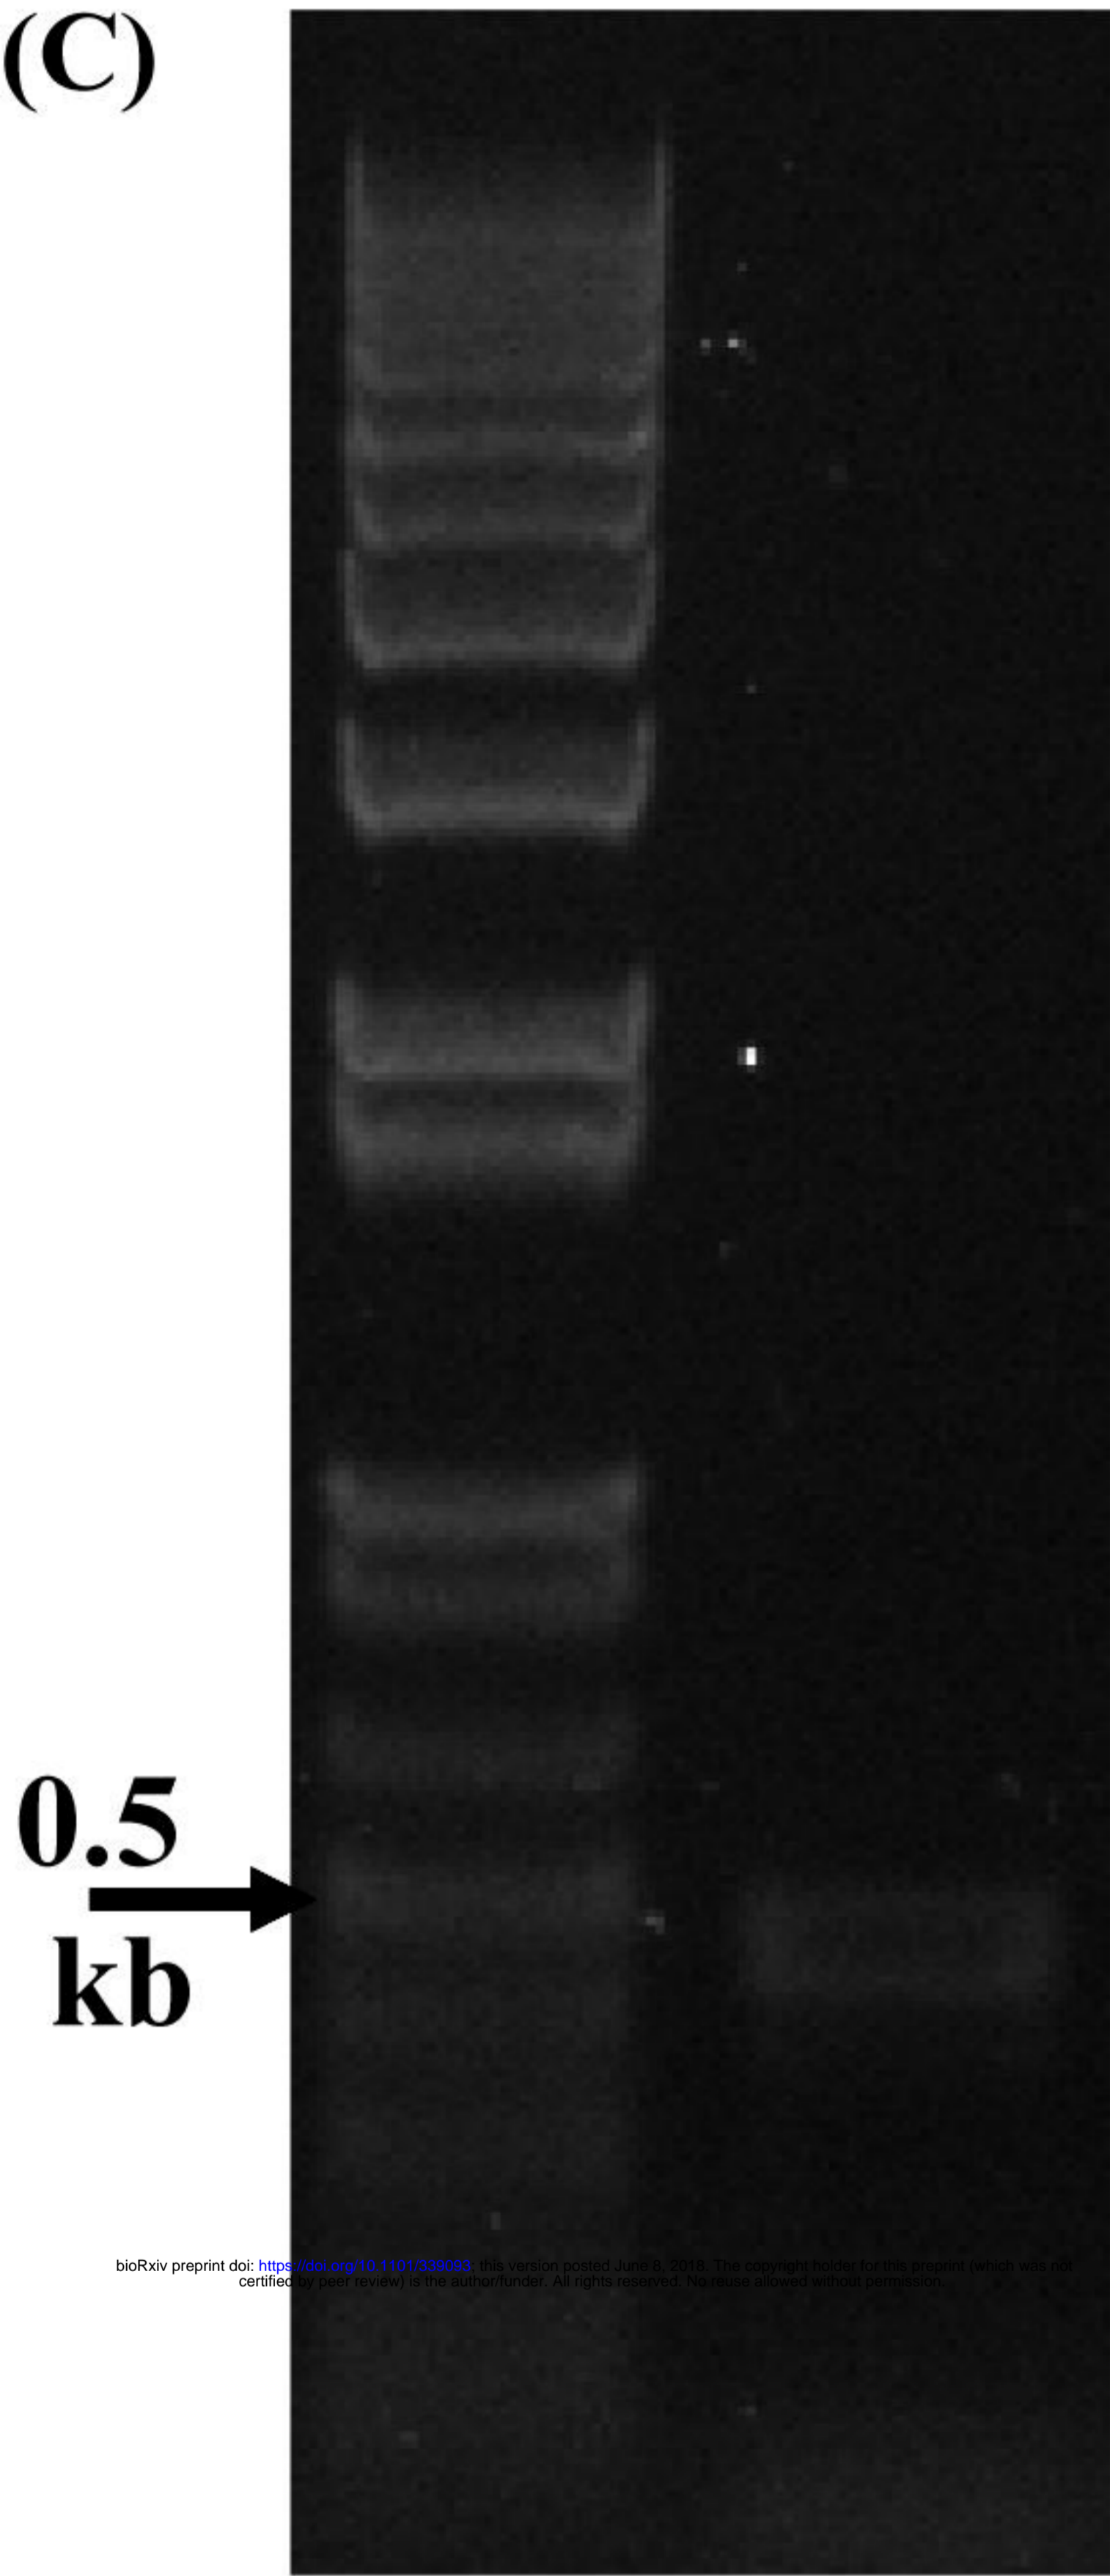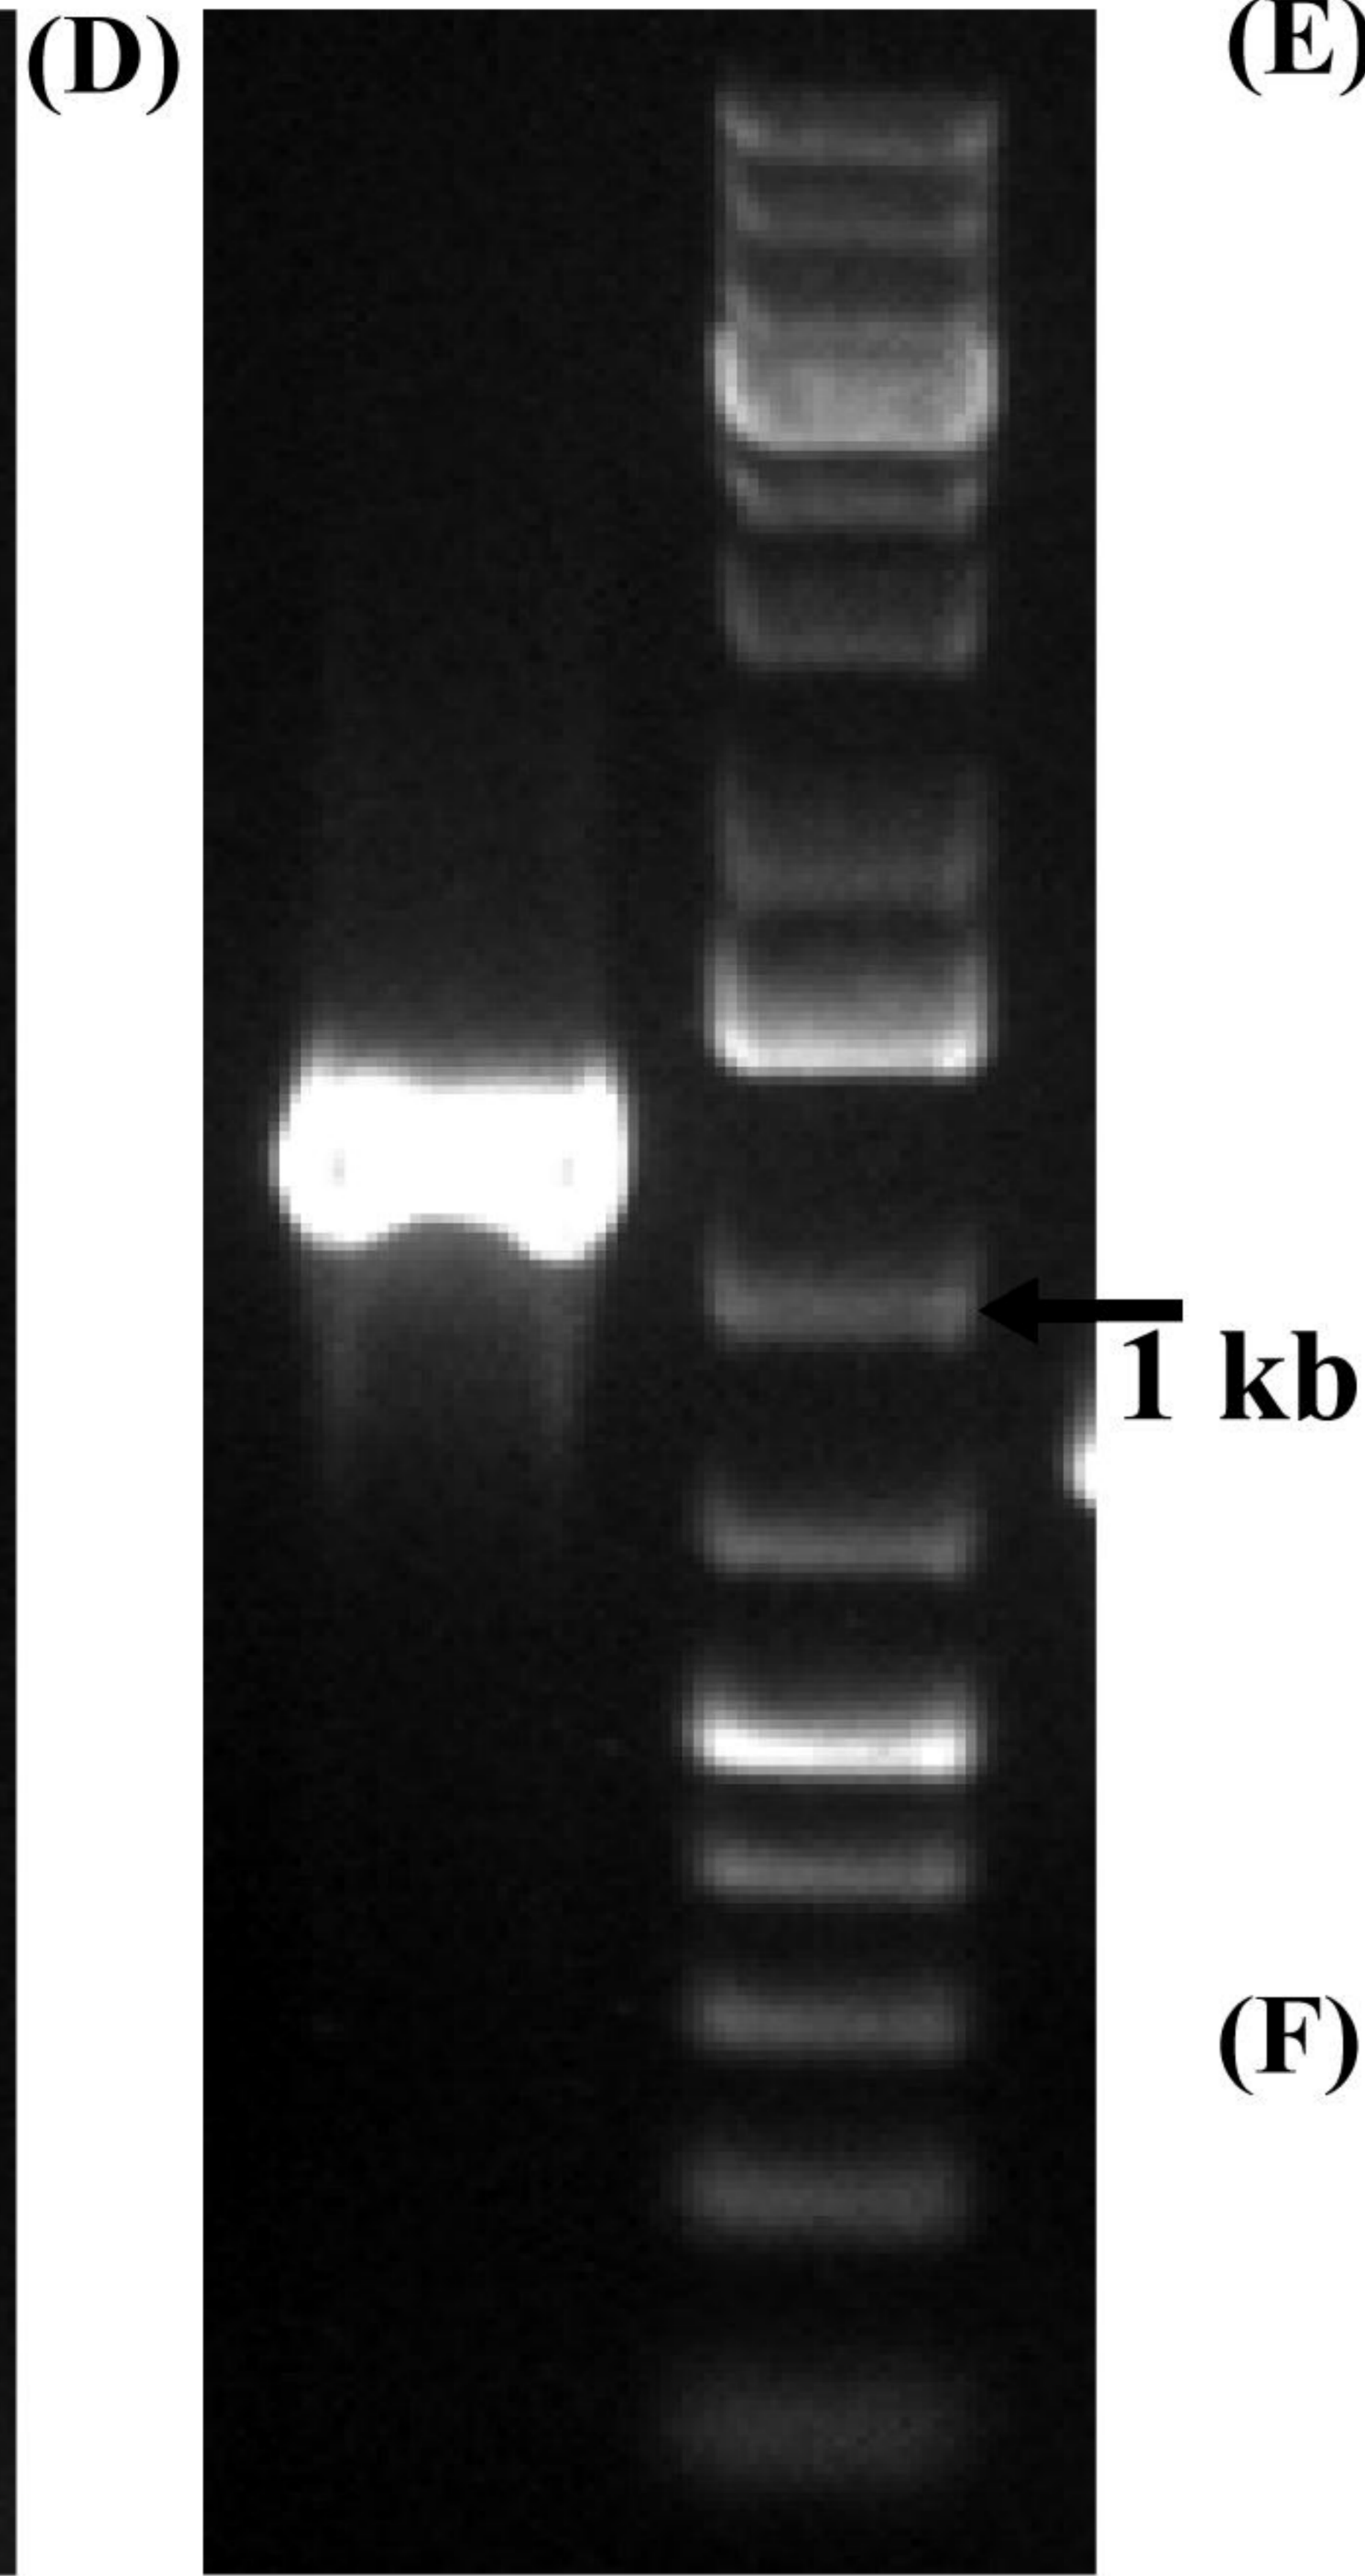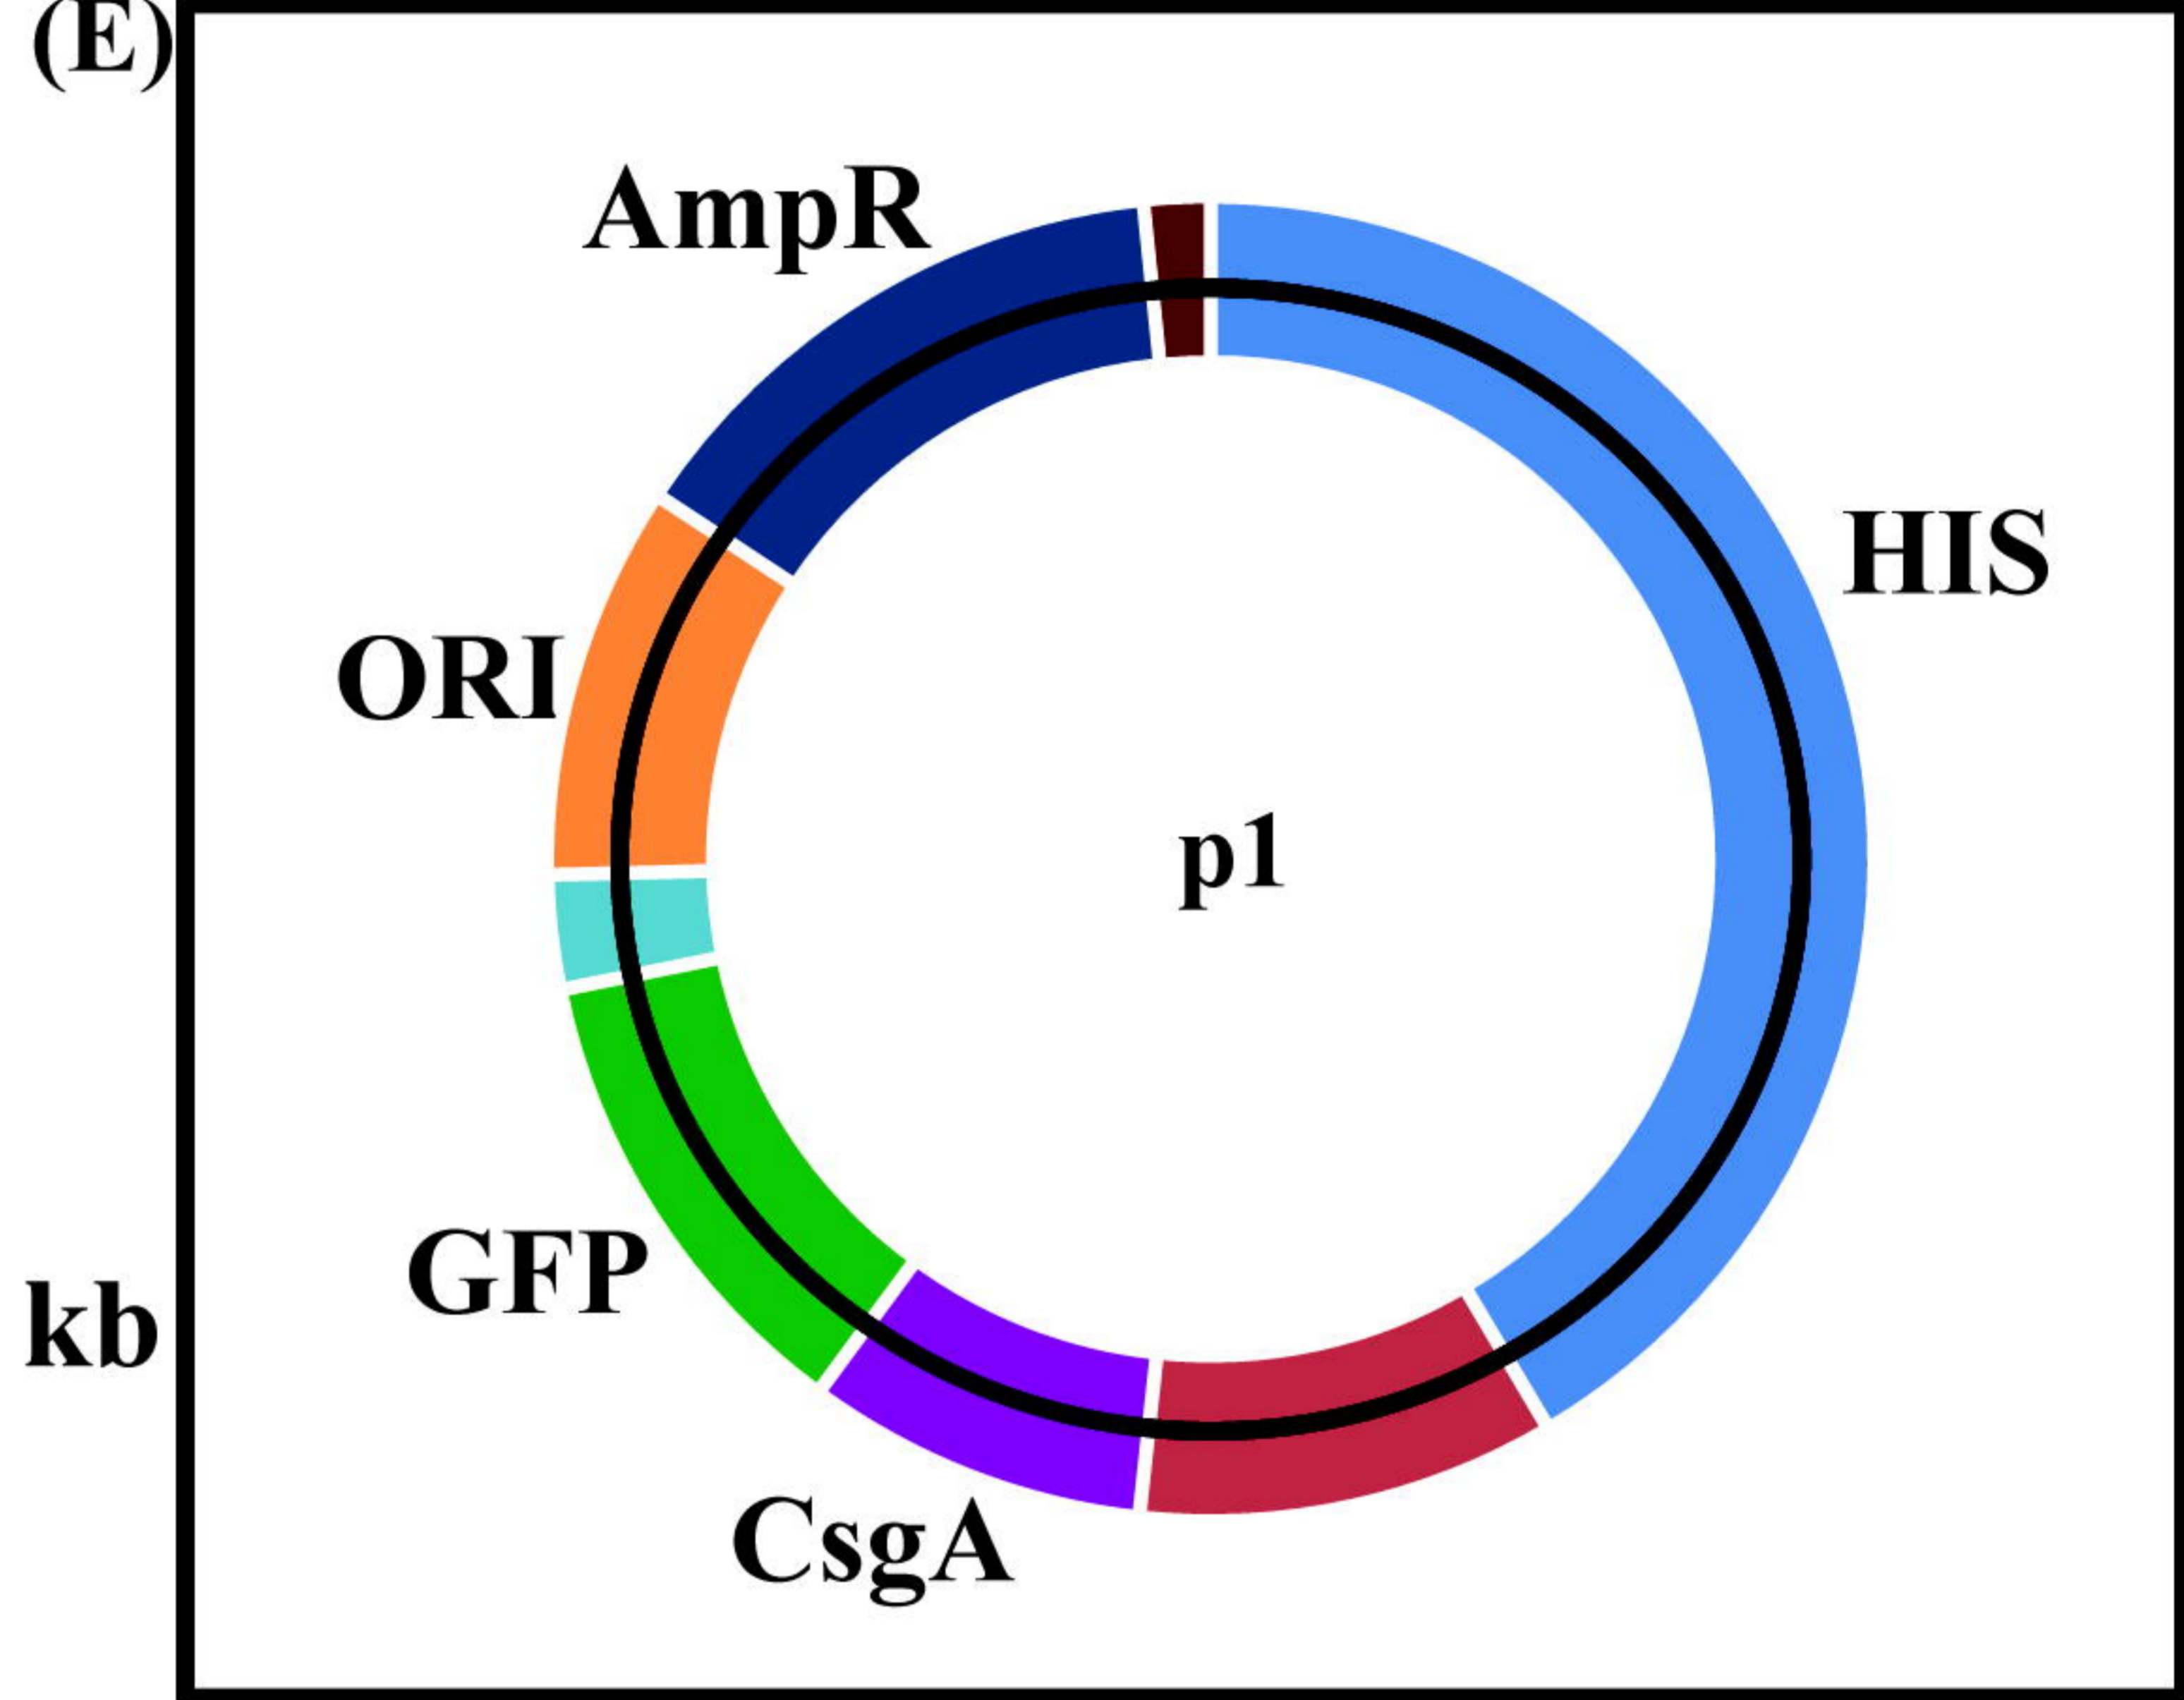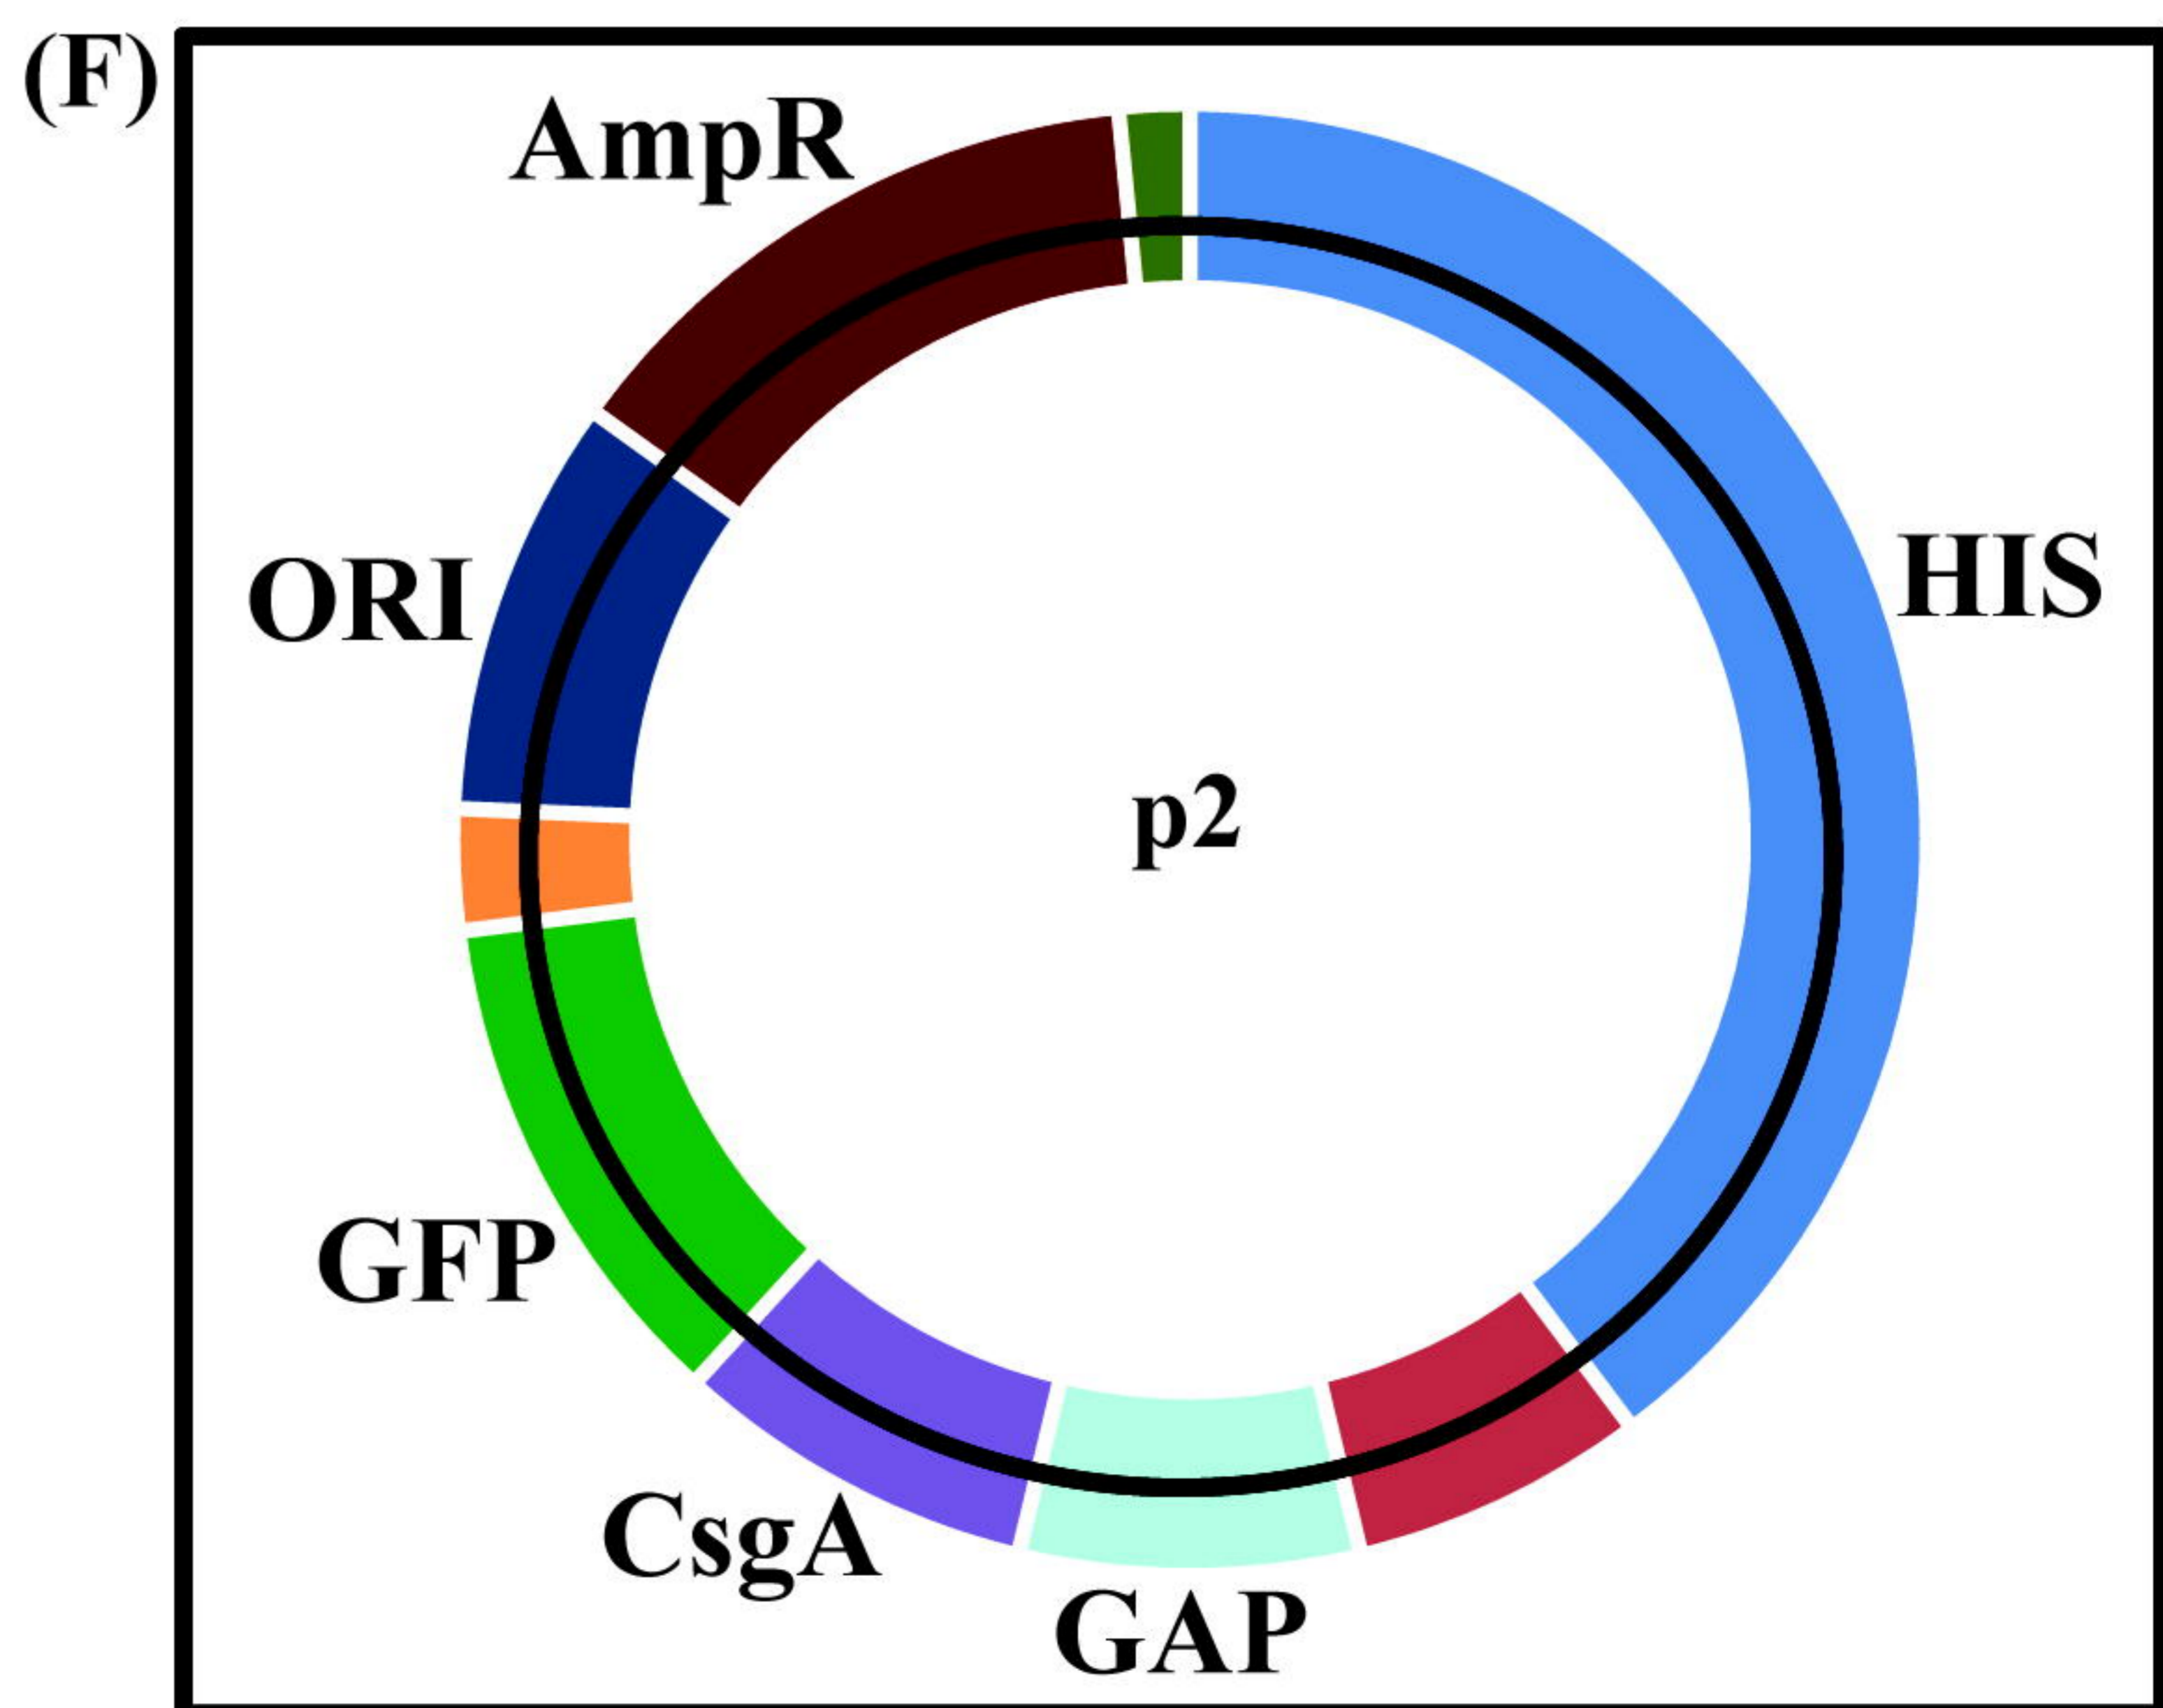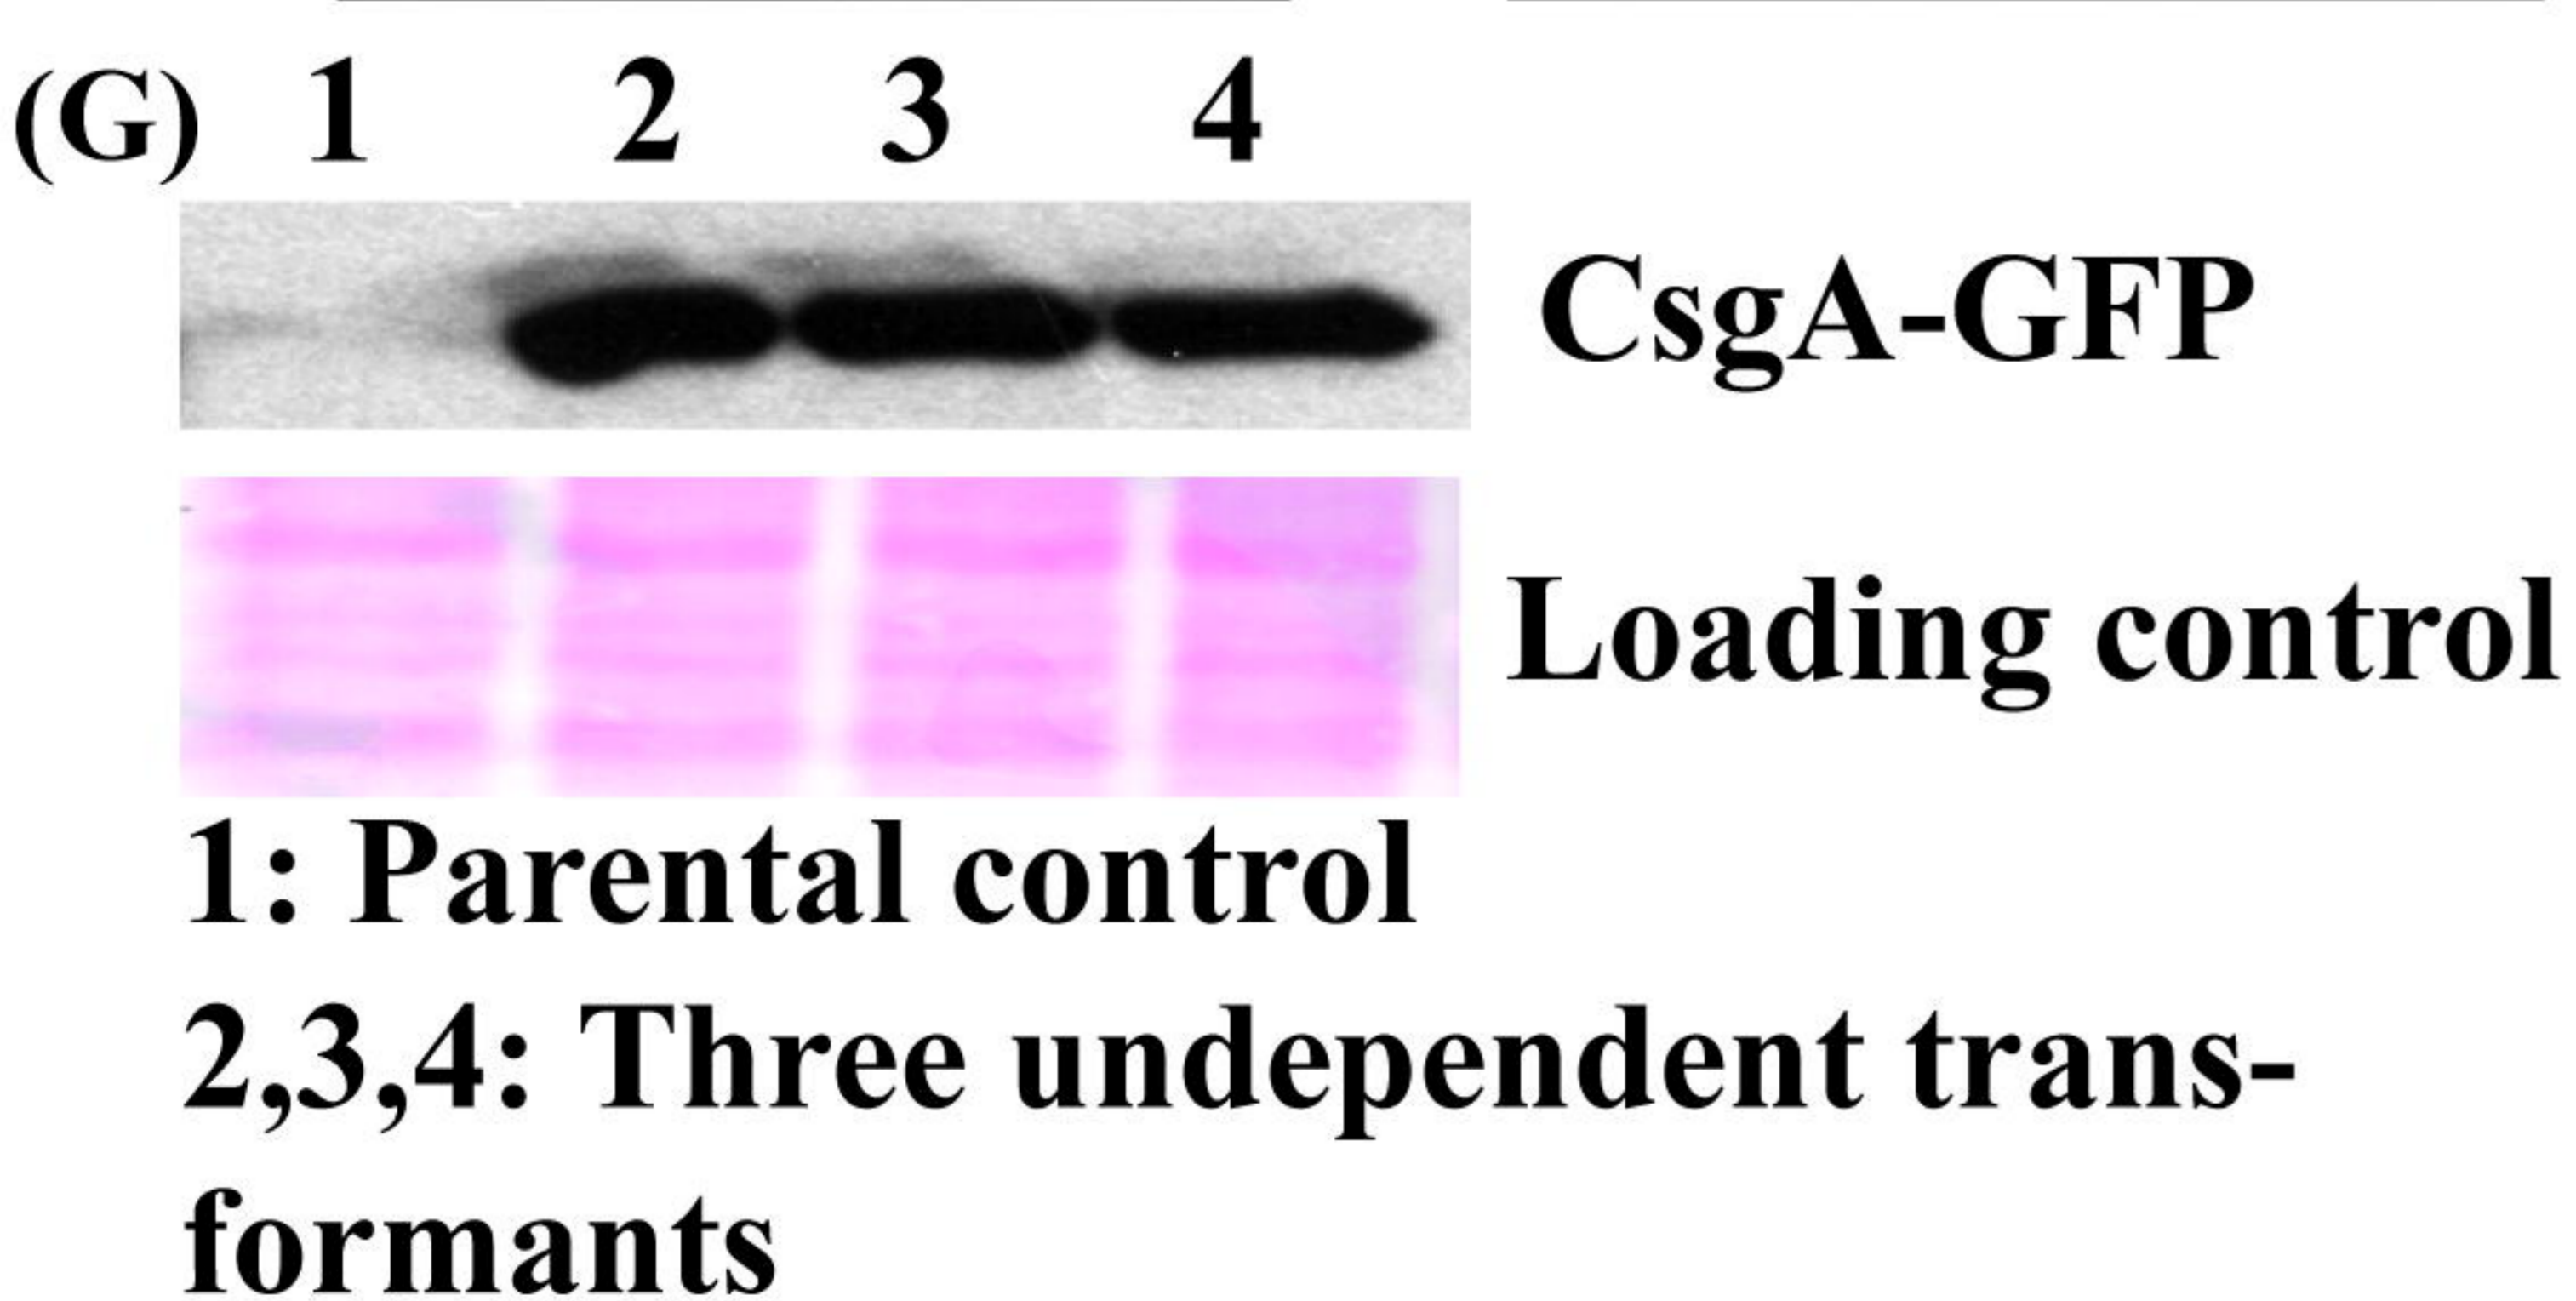



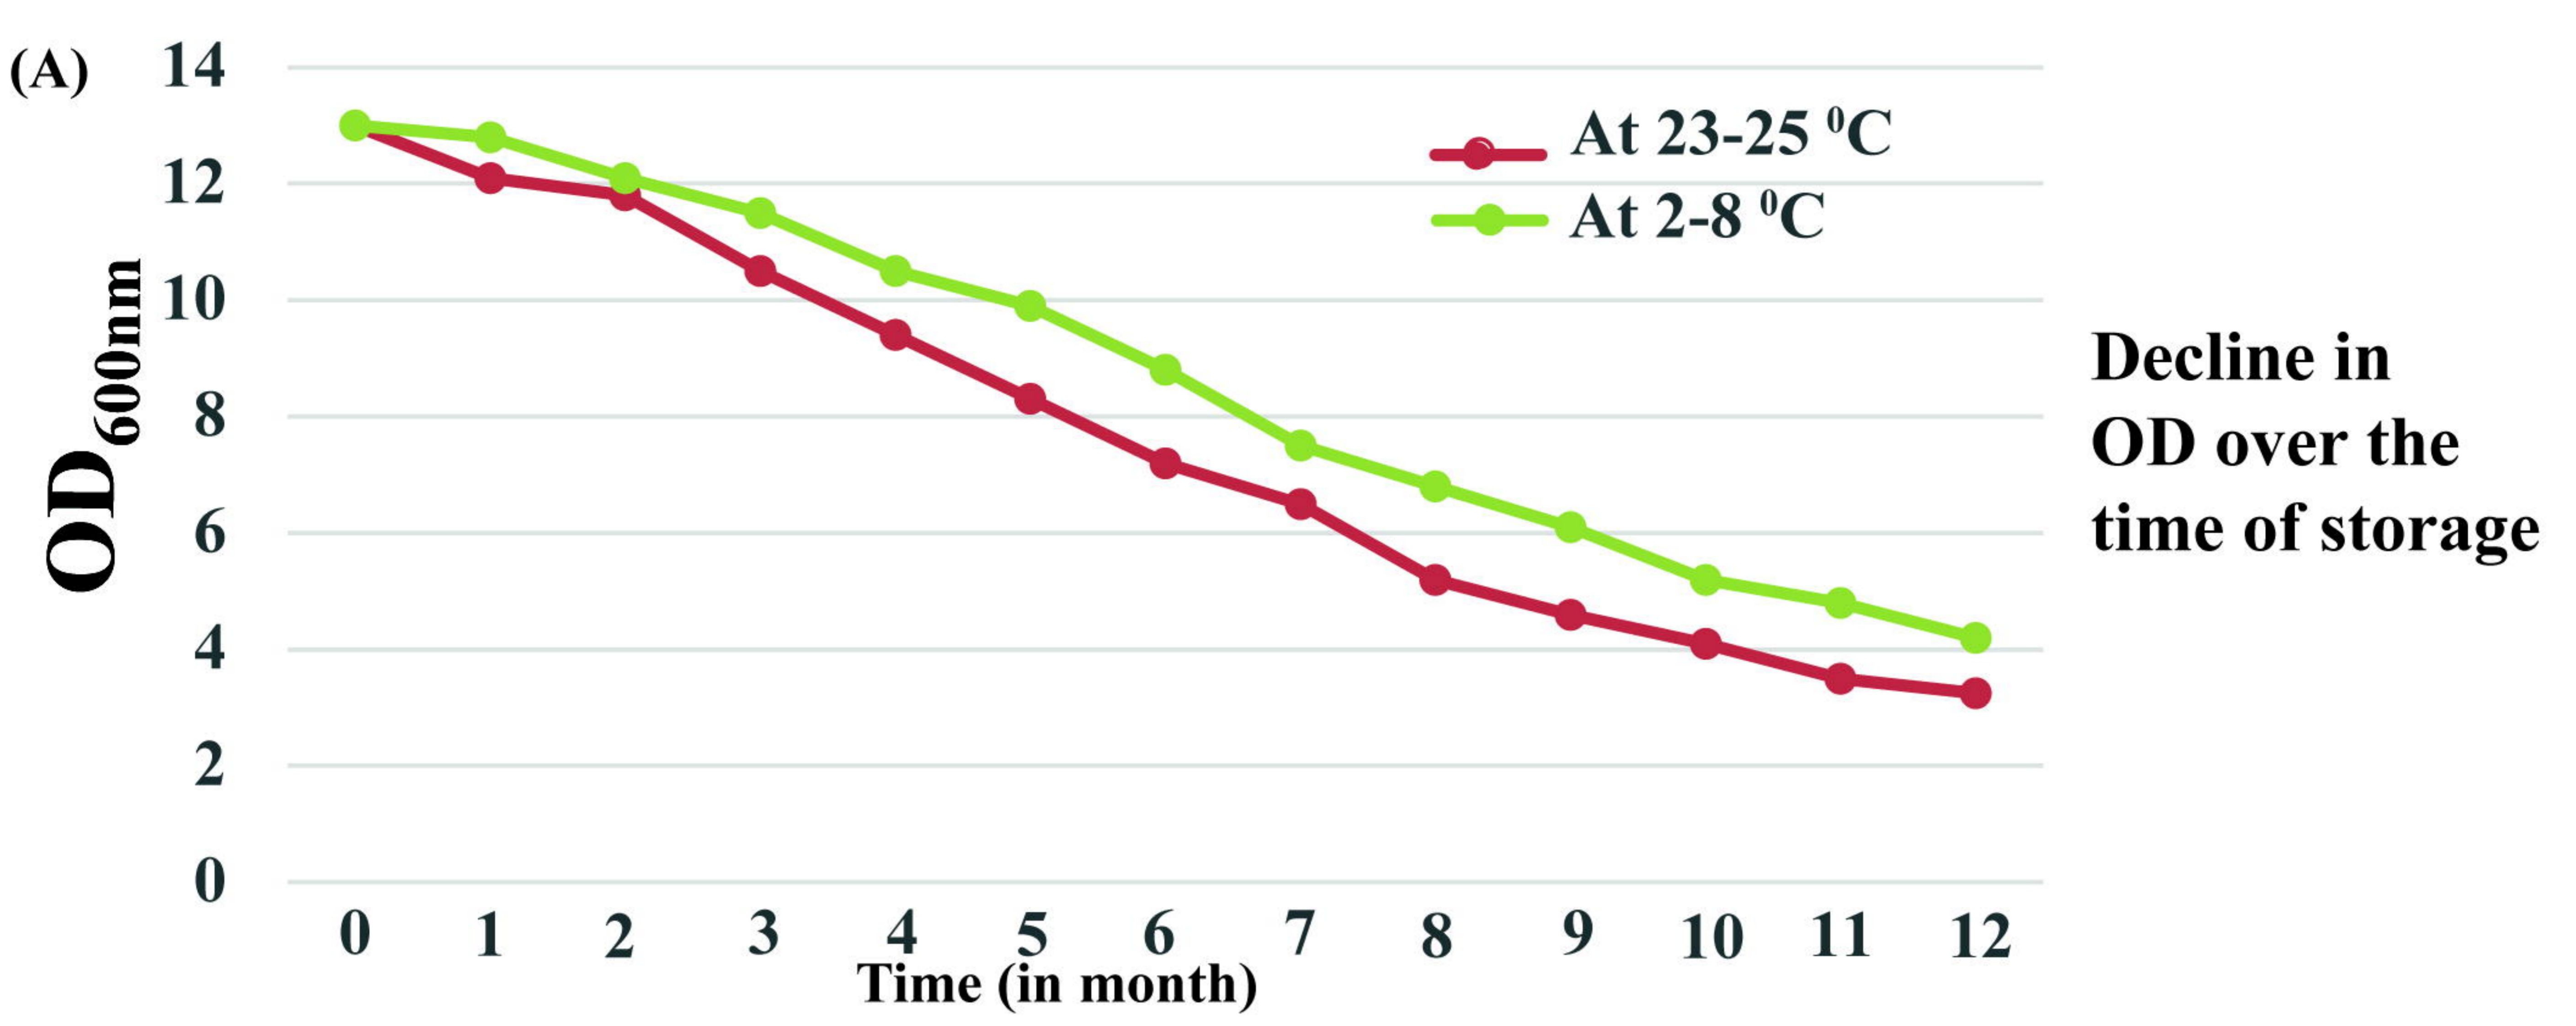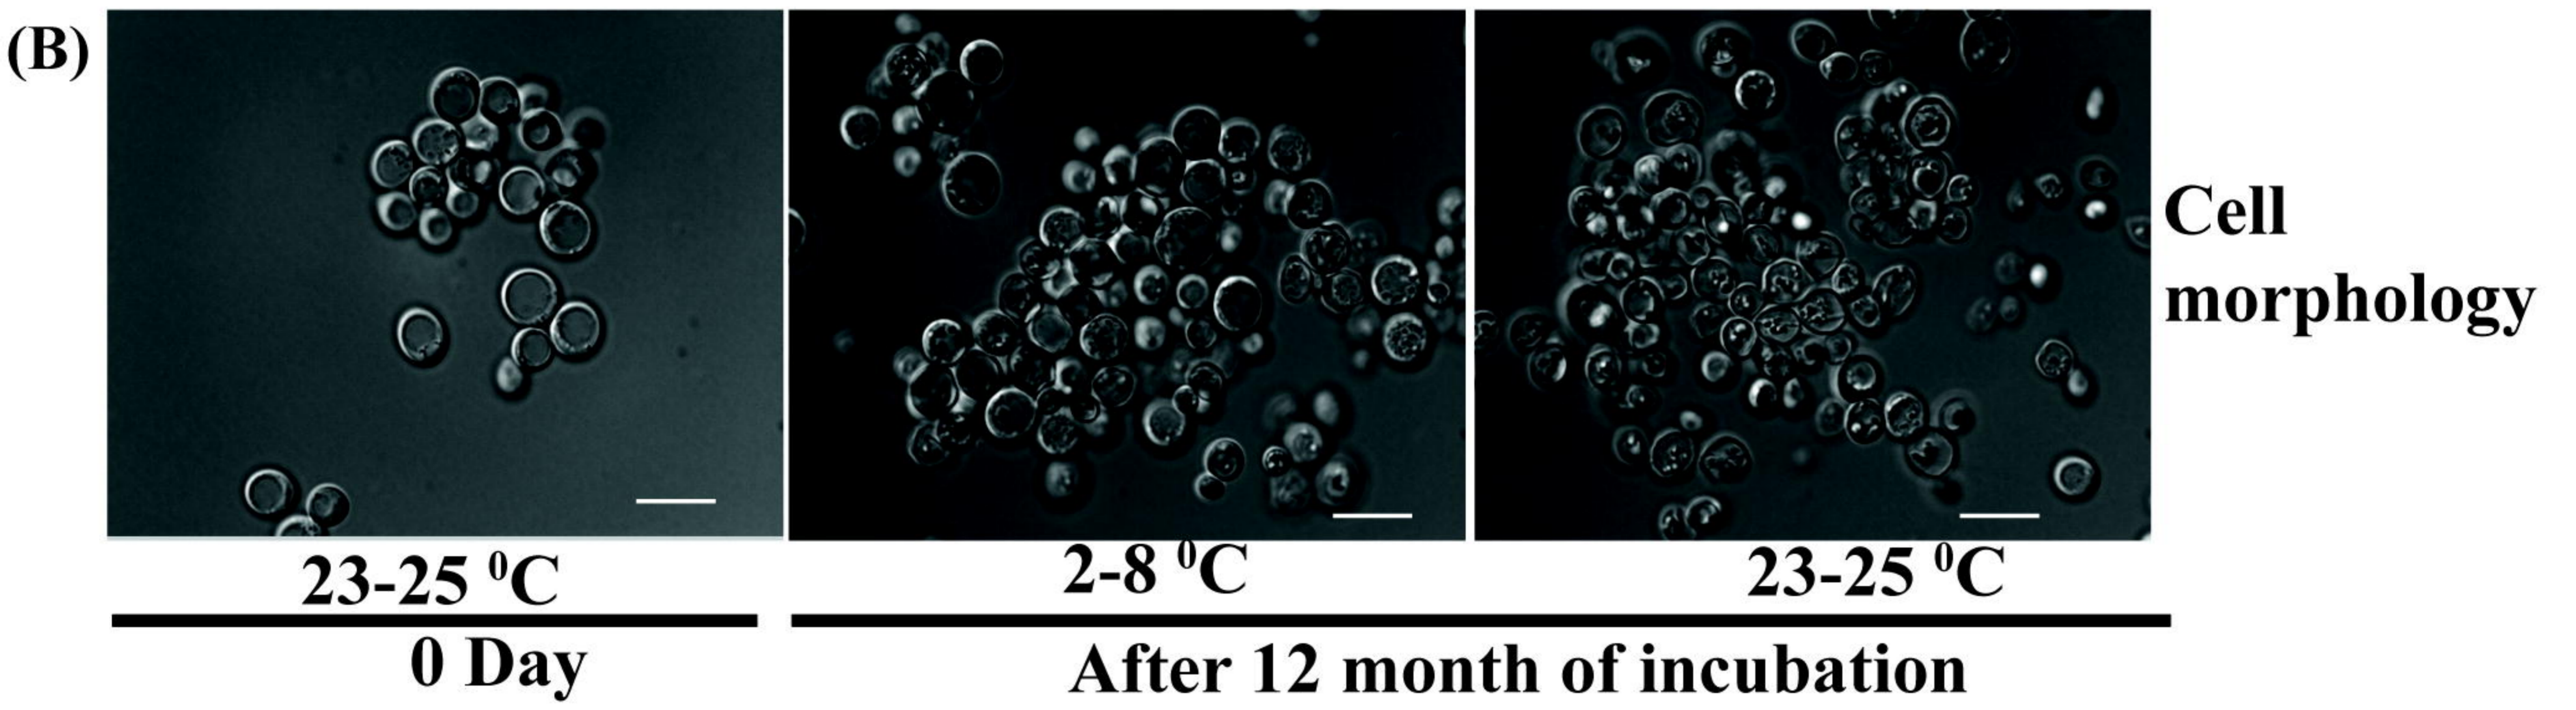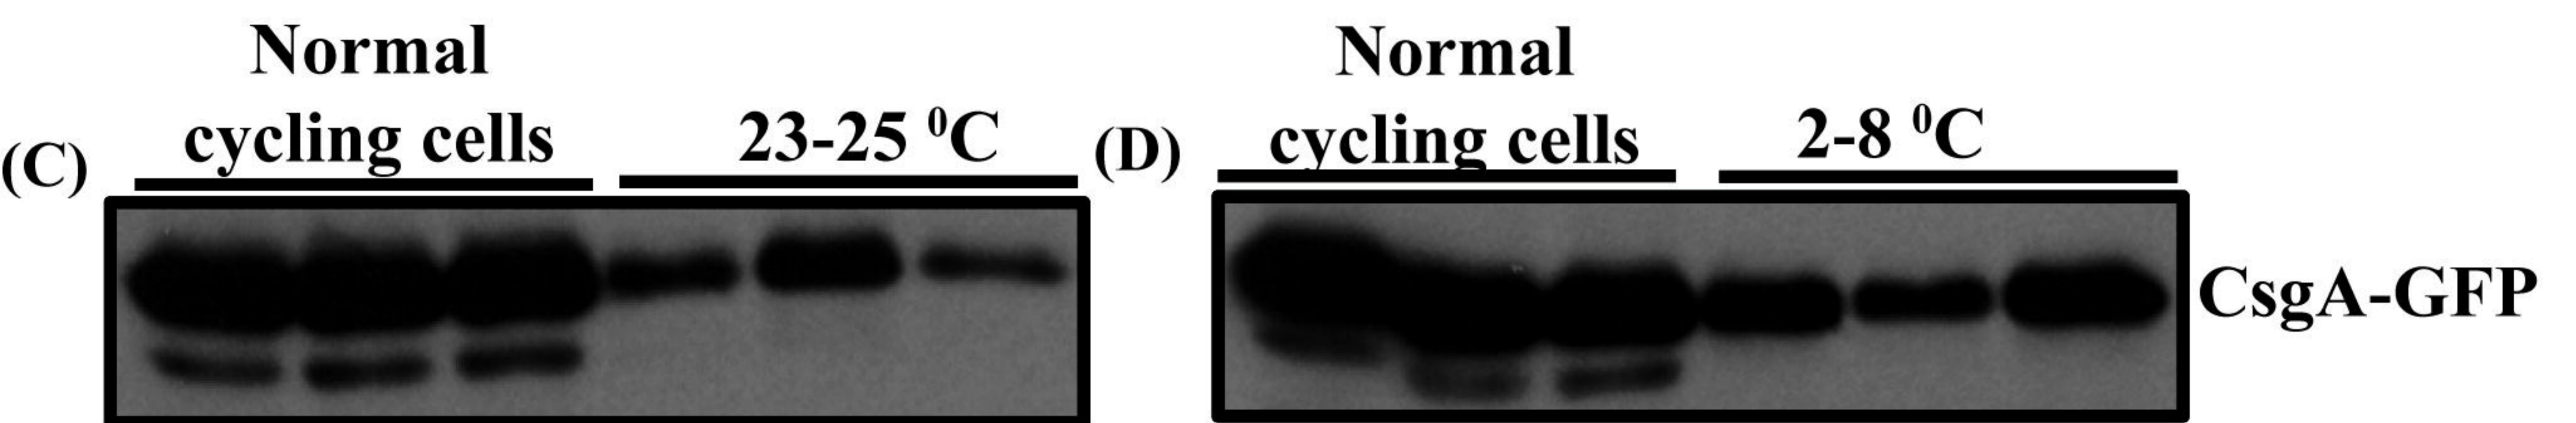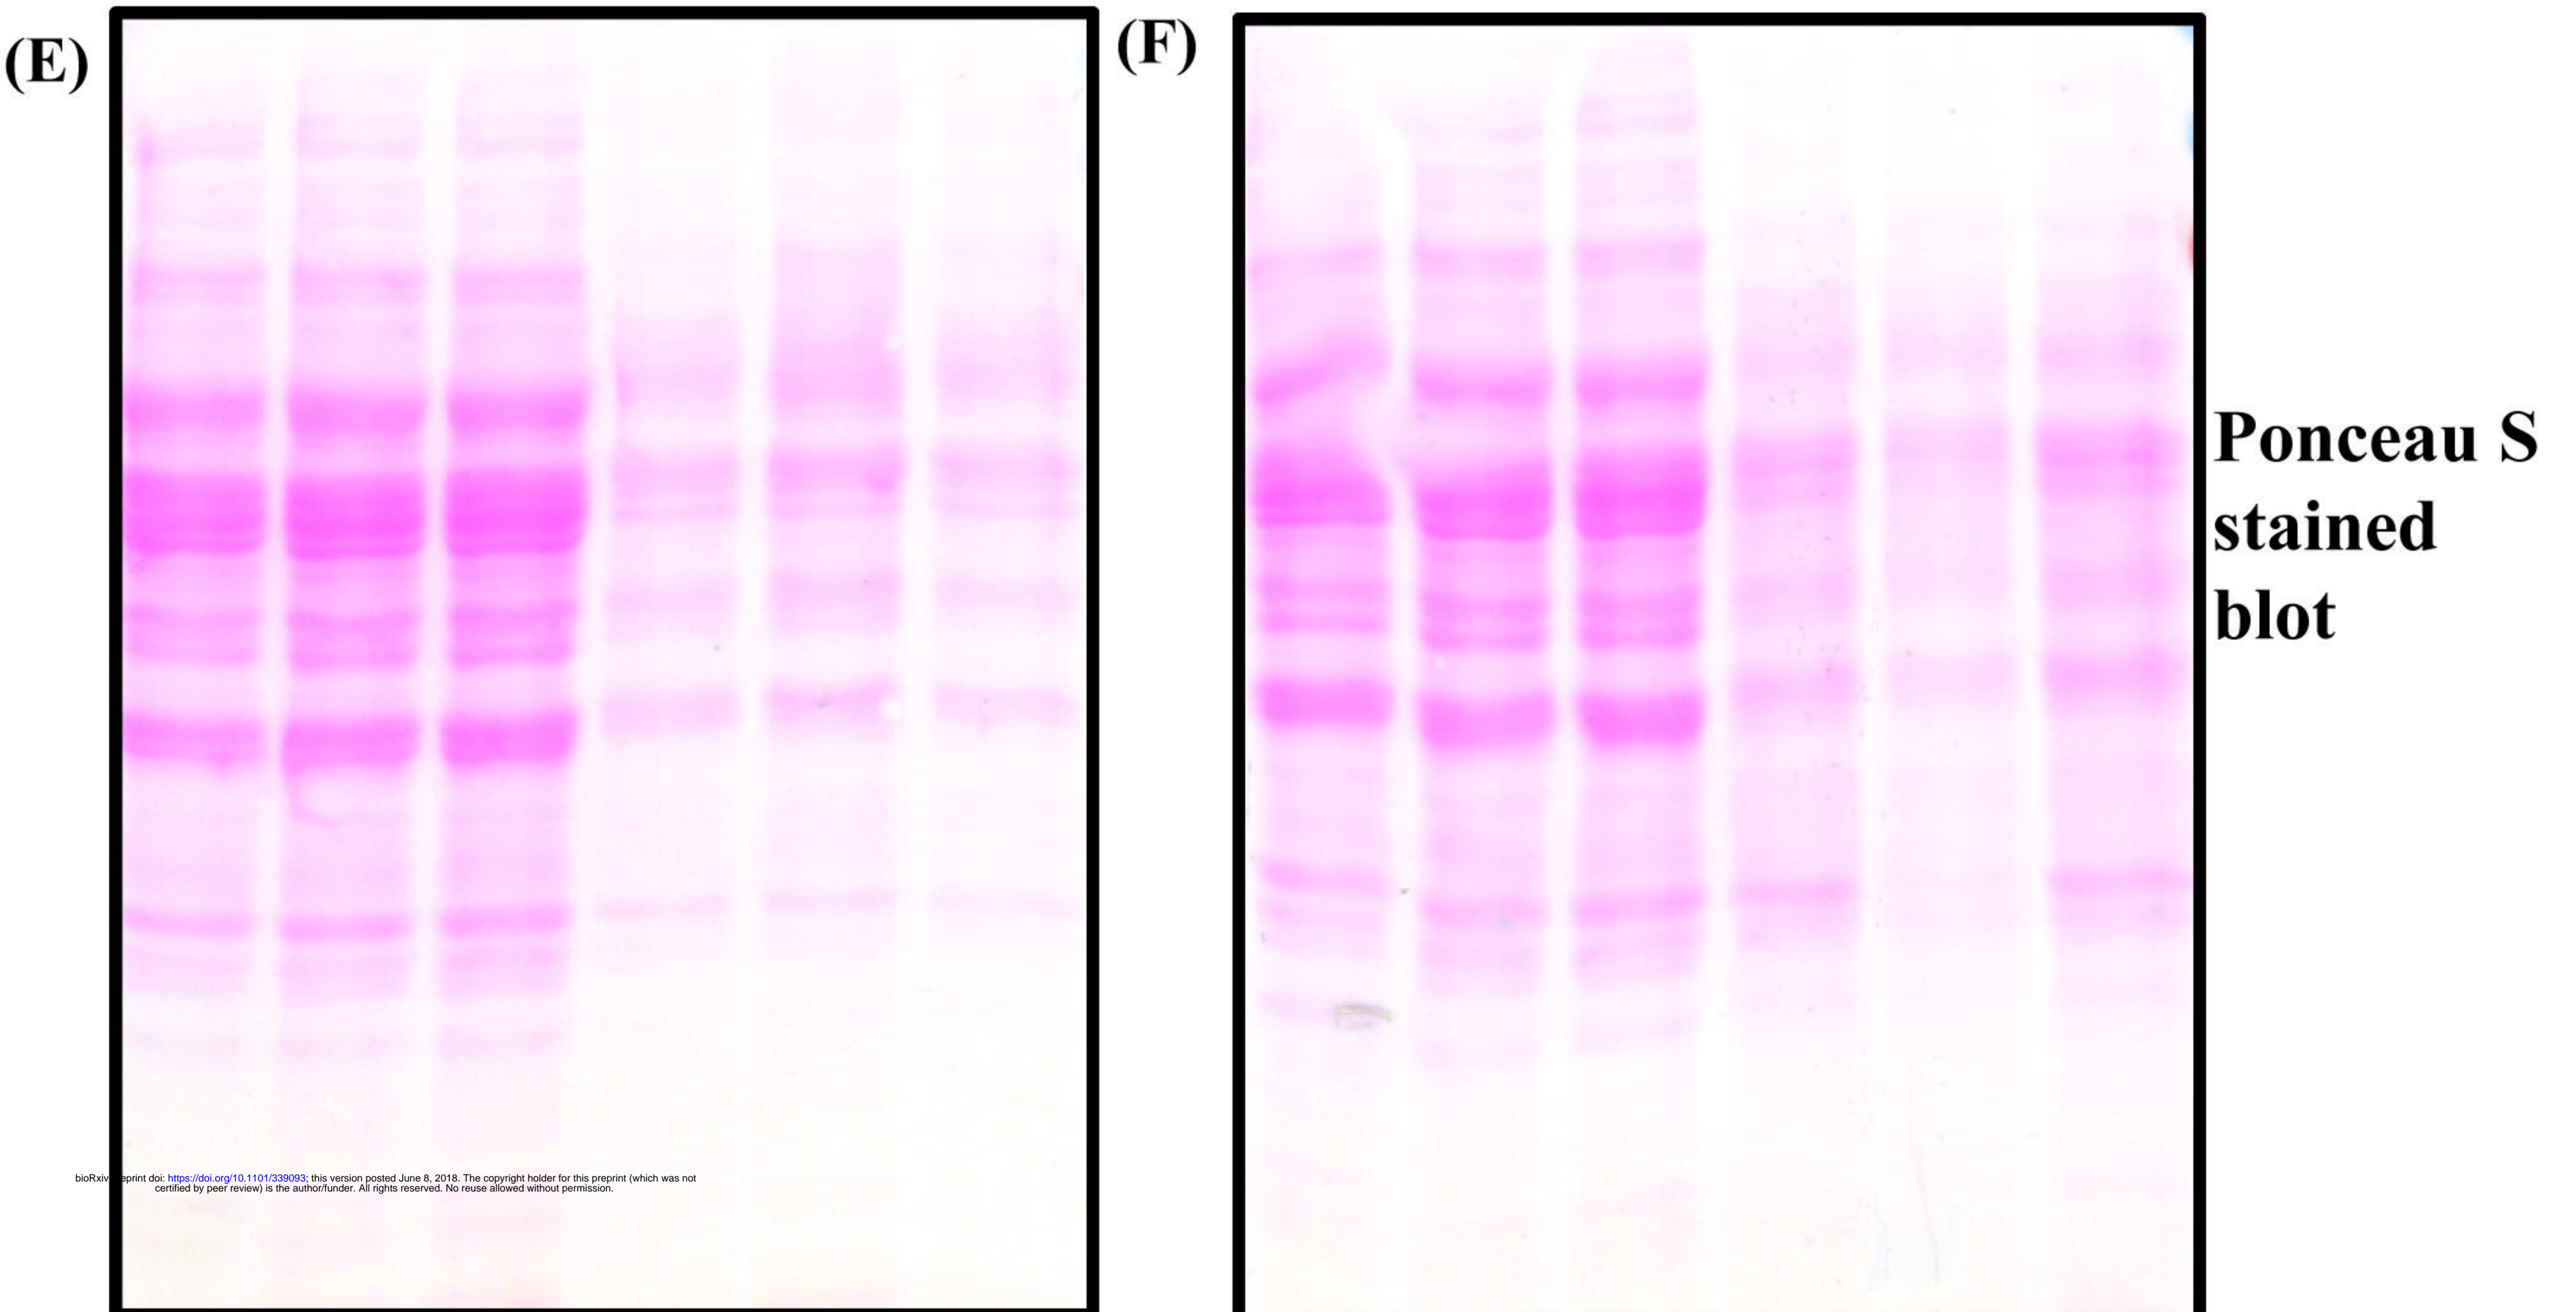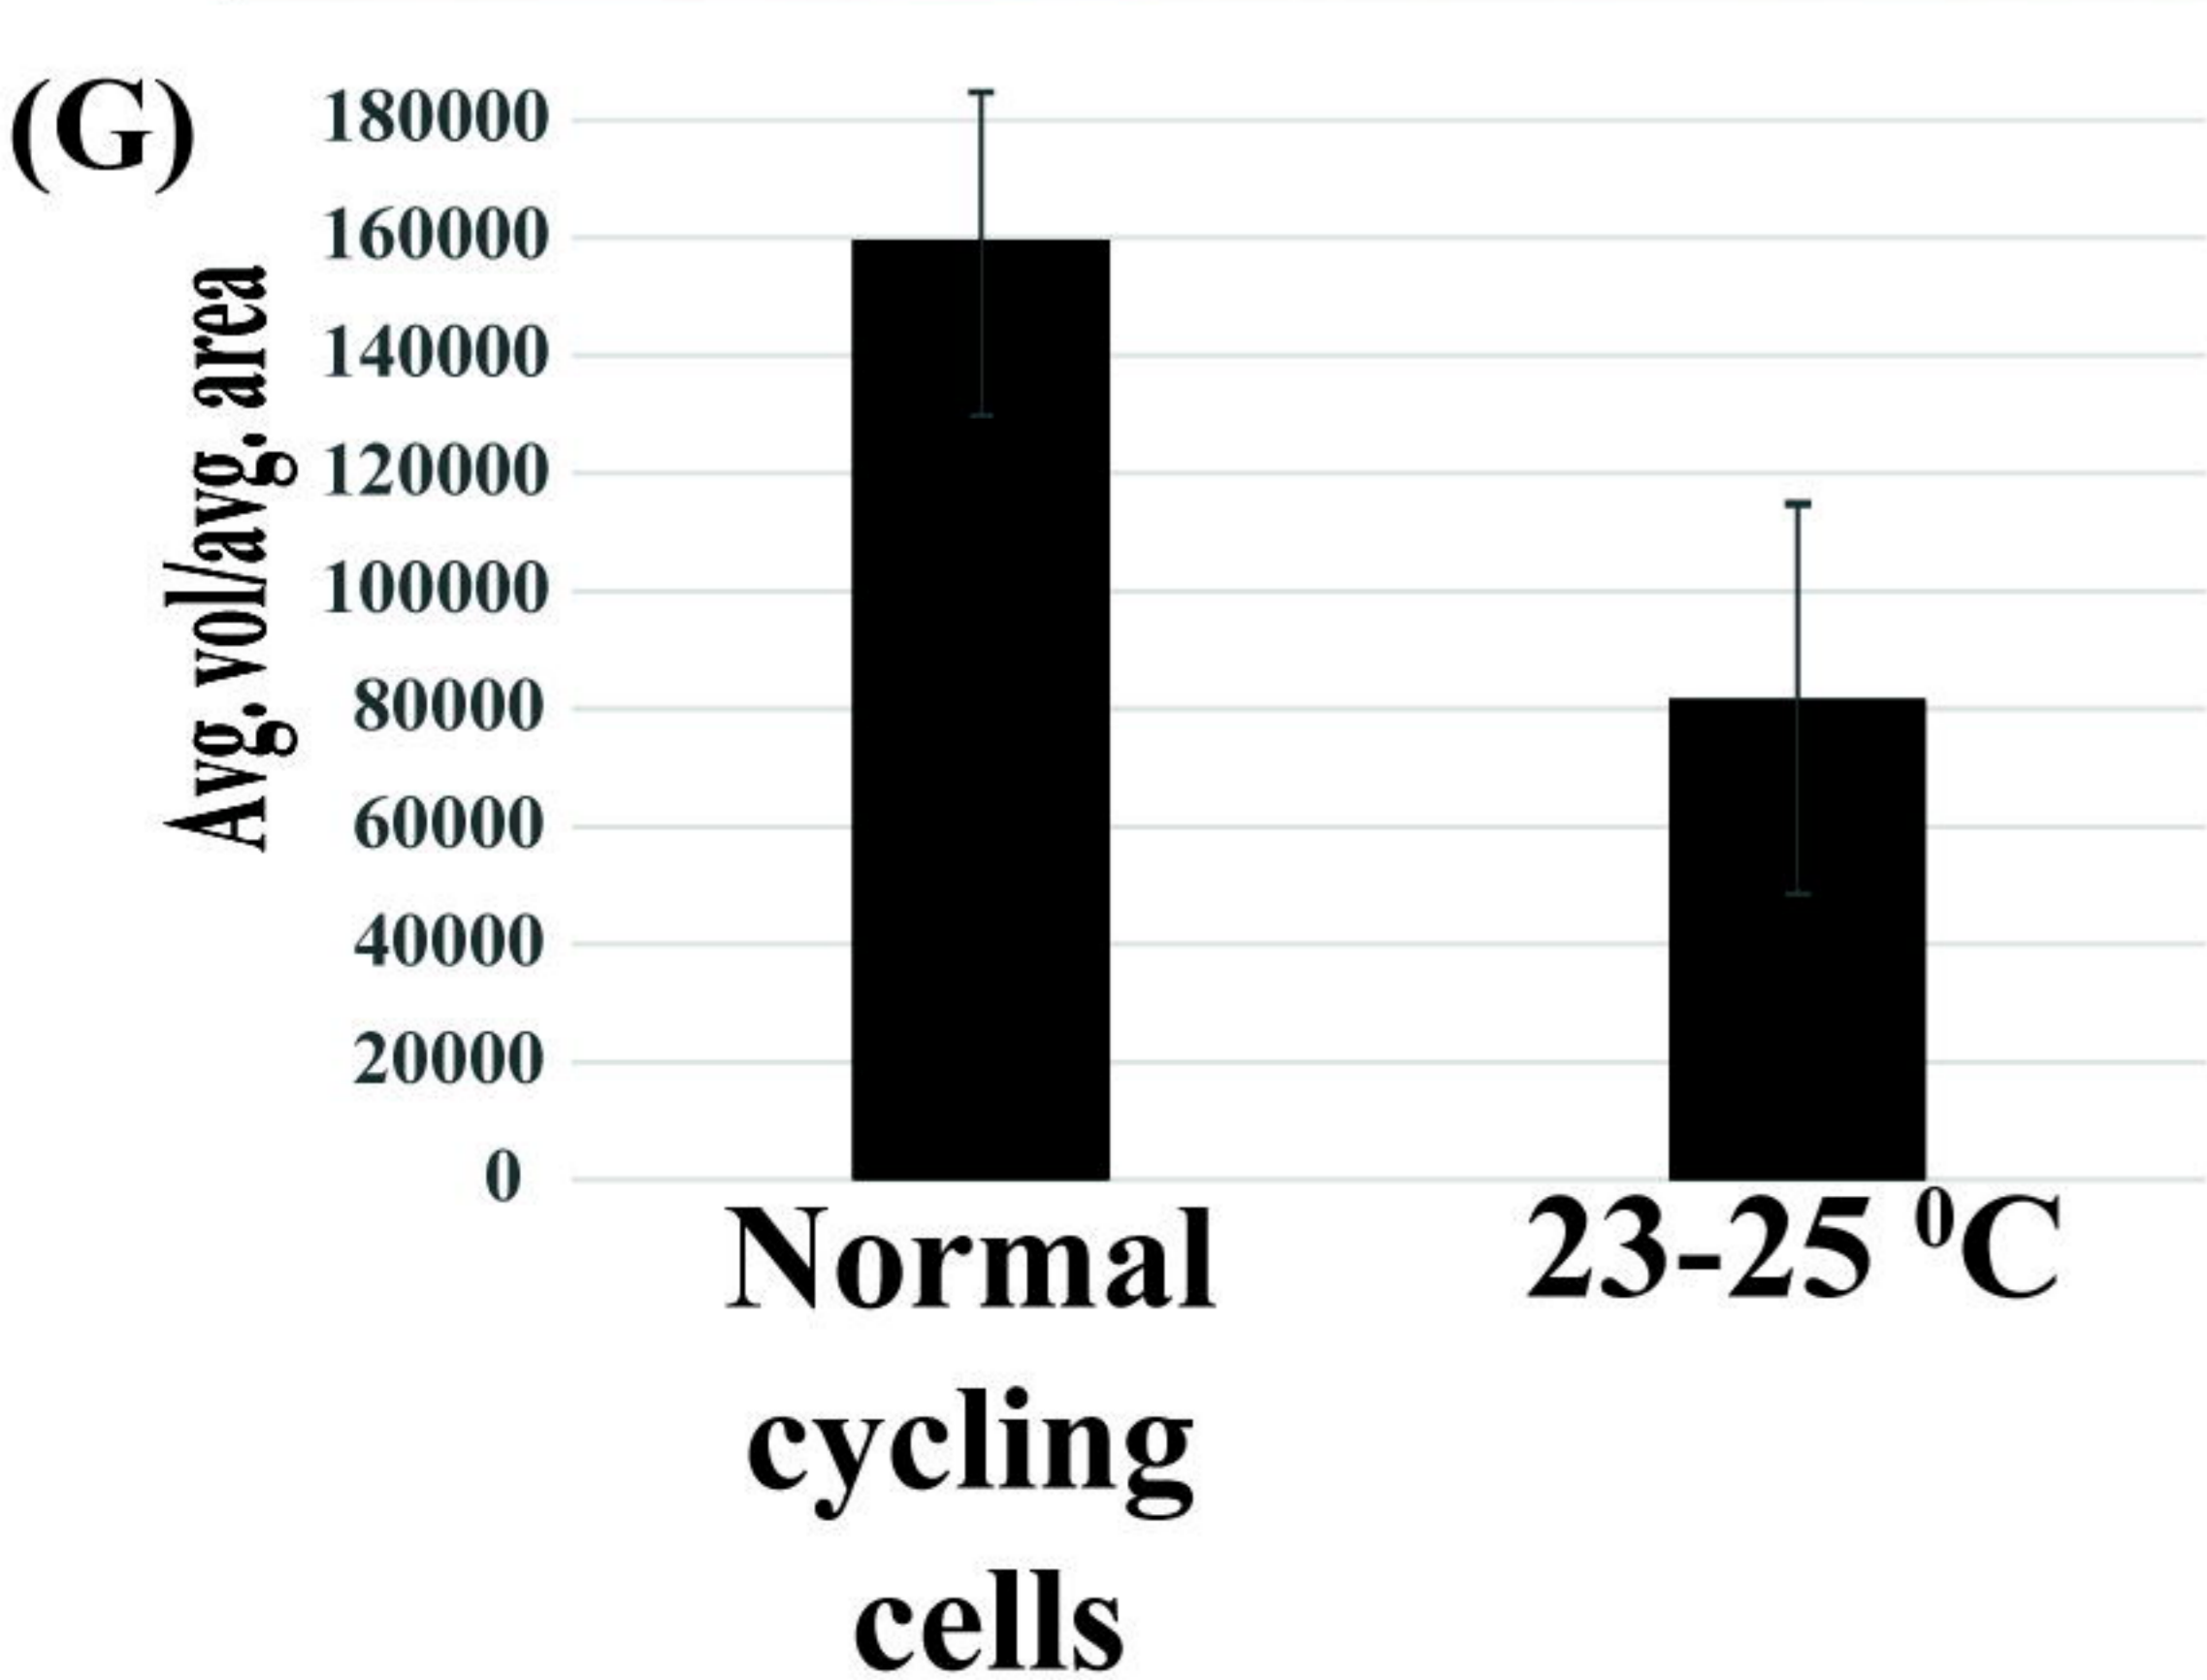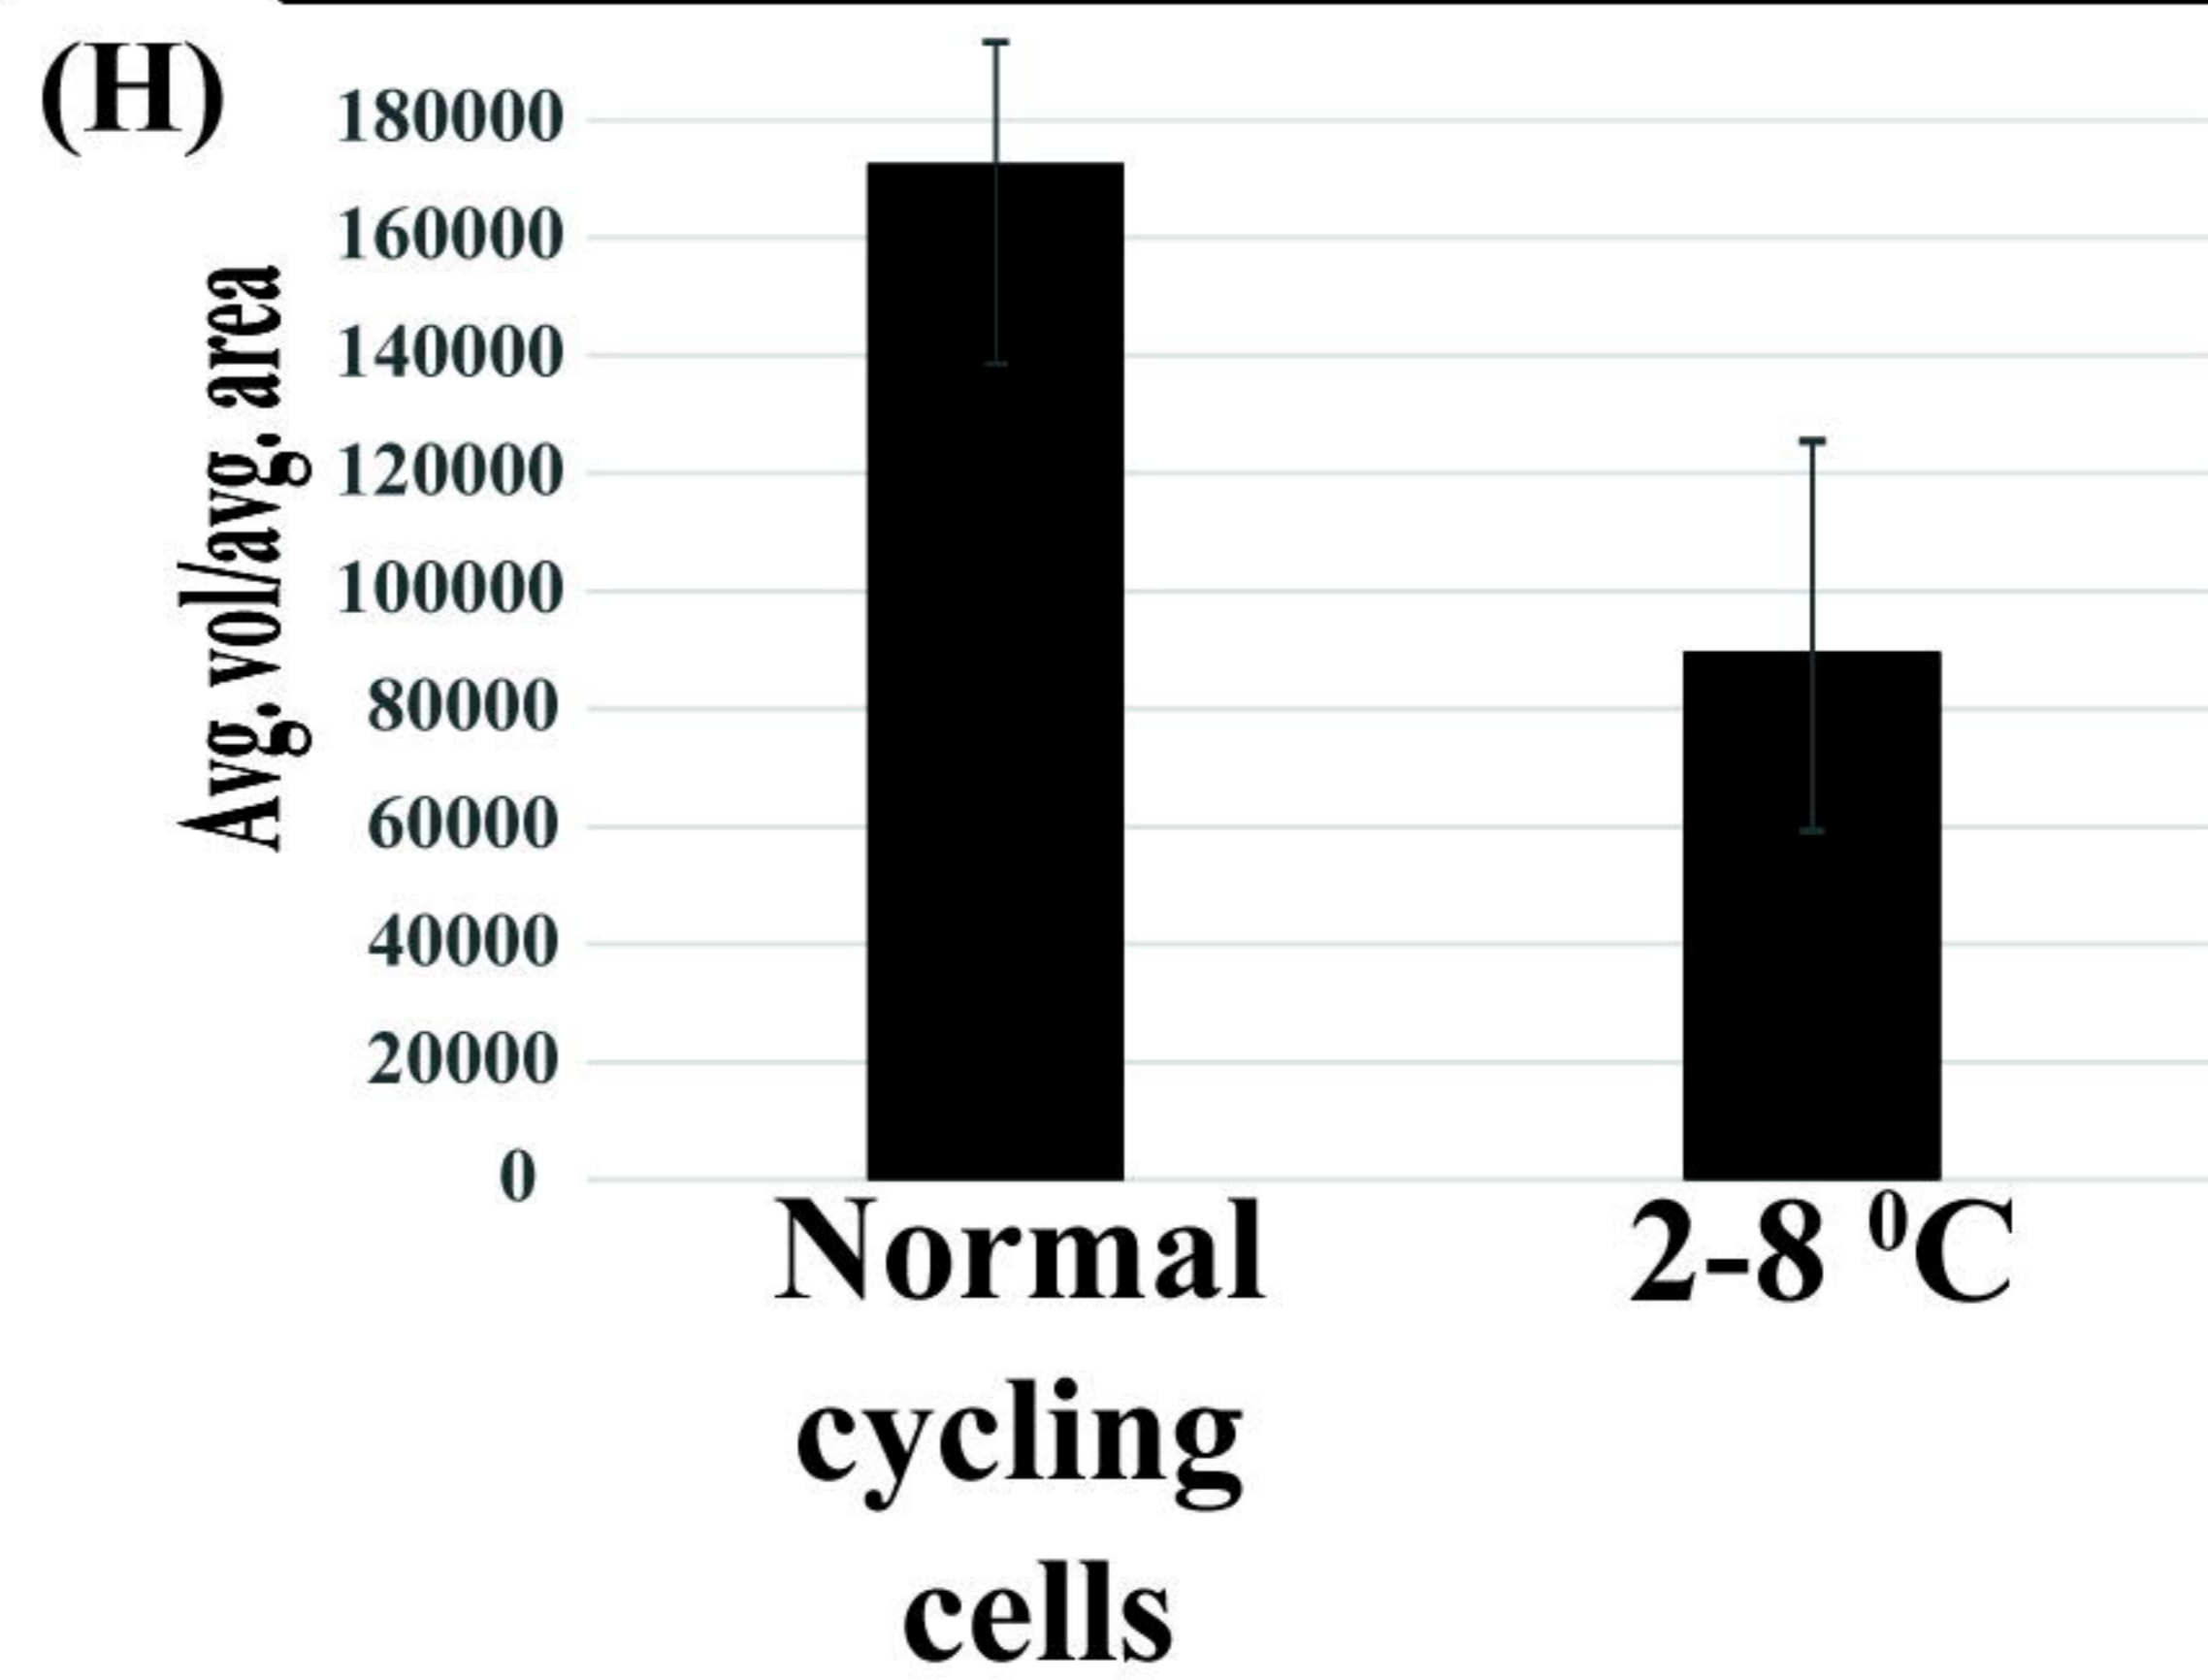



23-25 °C

2-8 °C

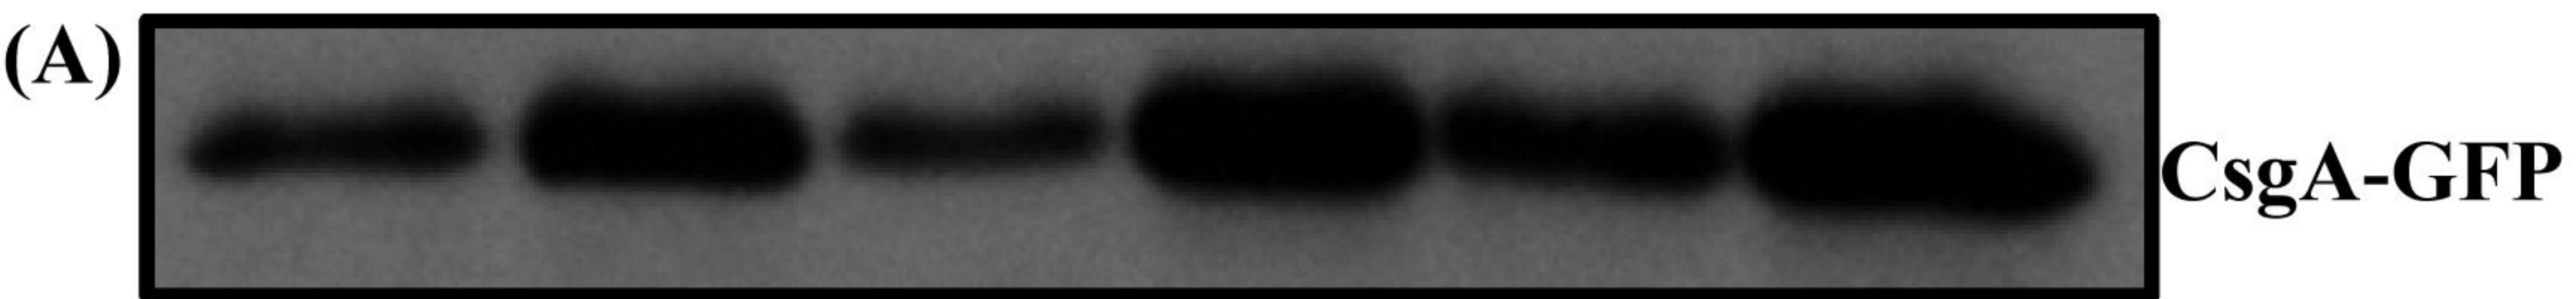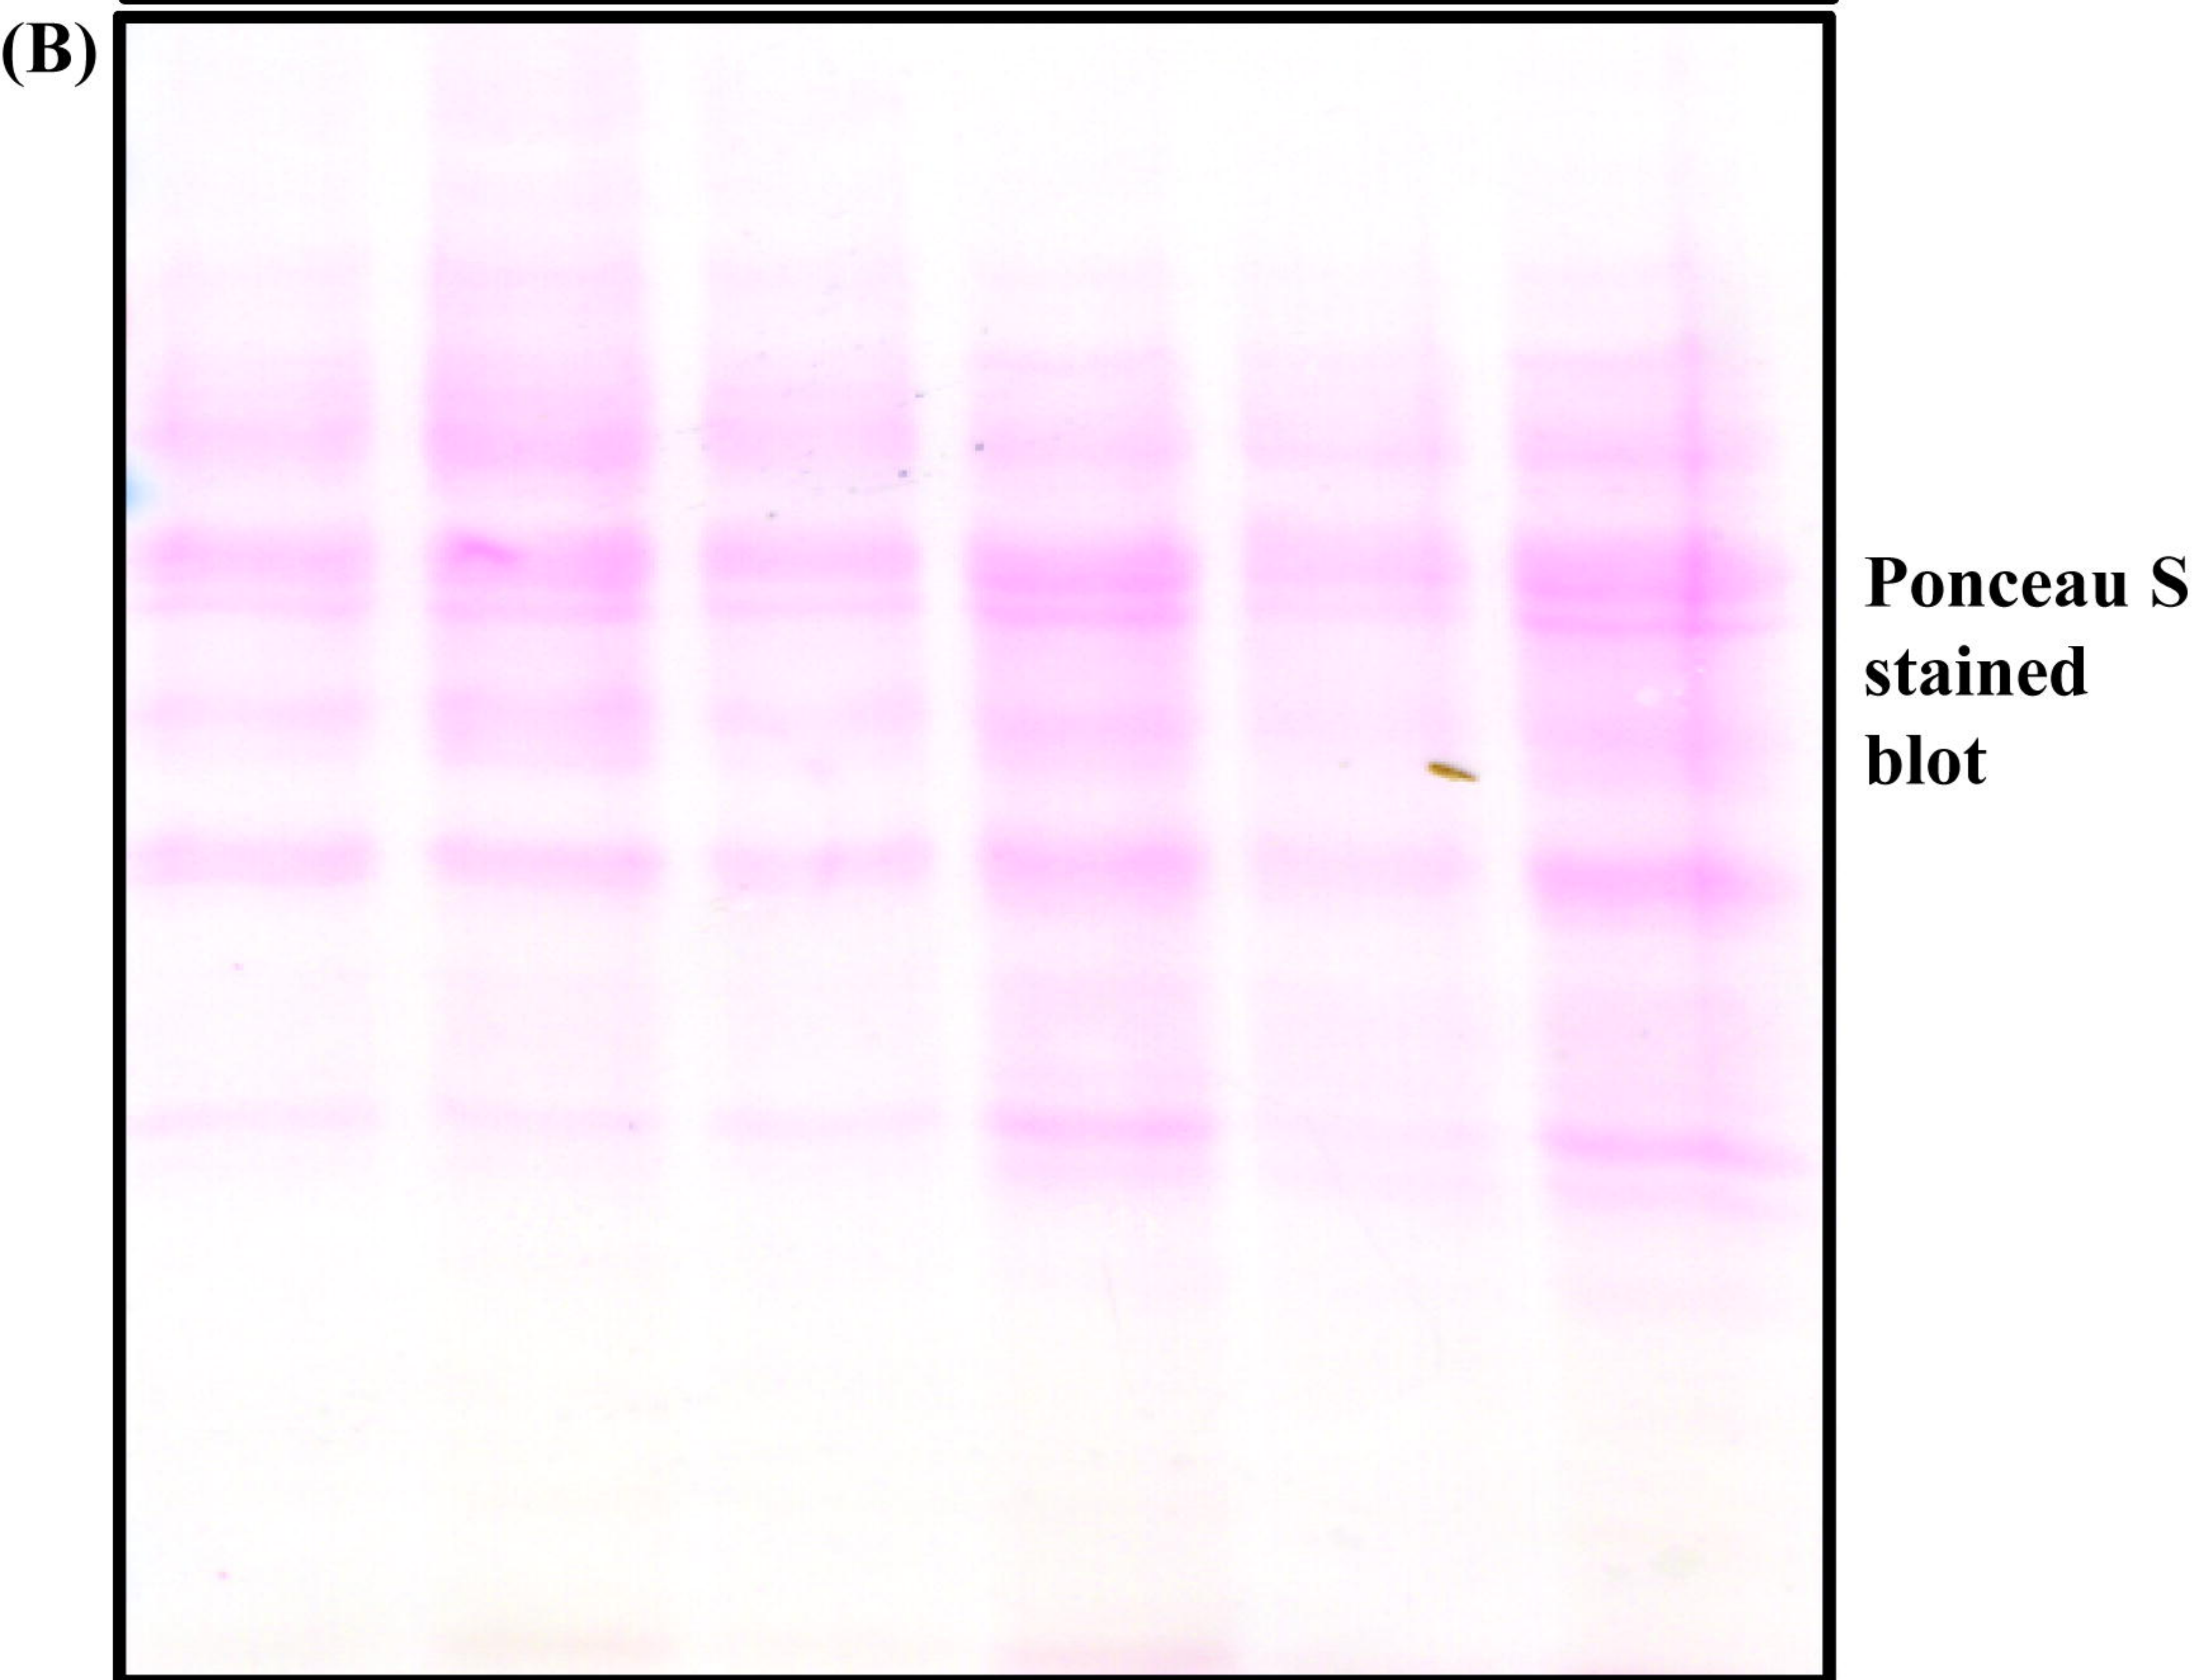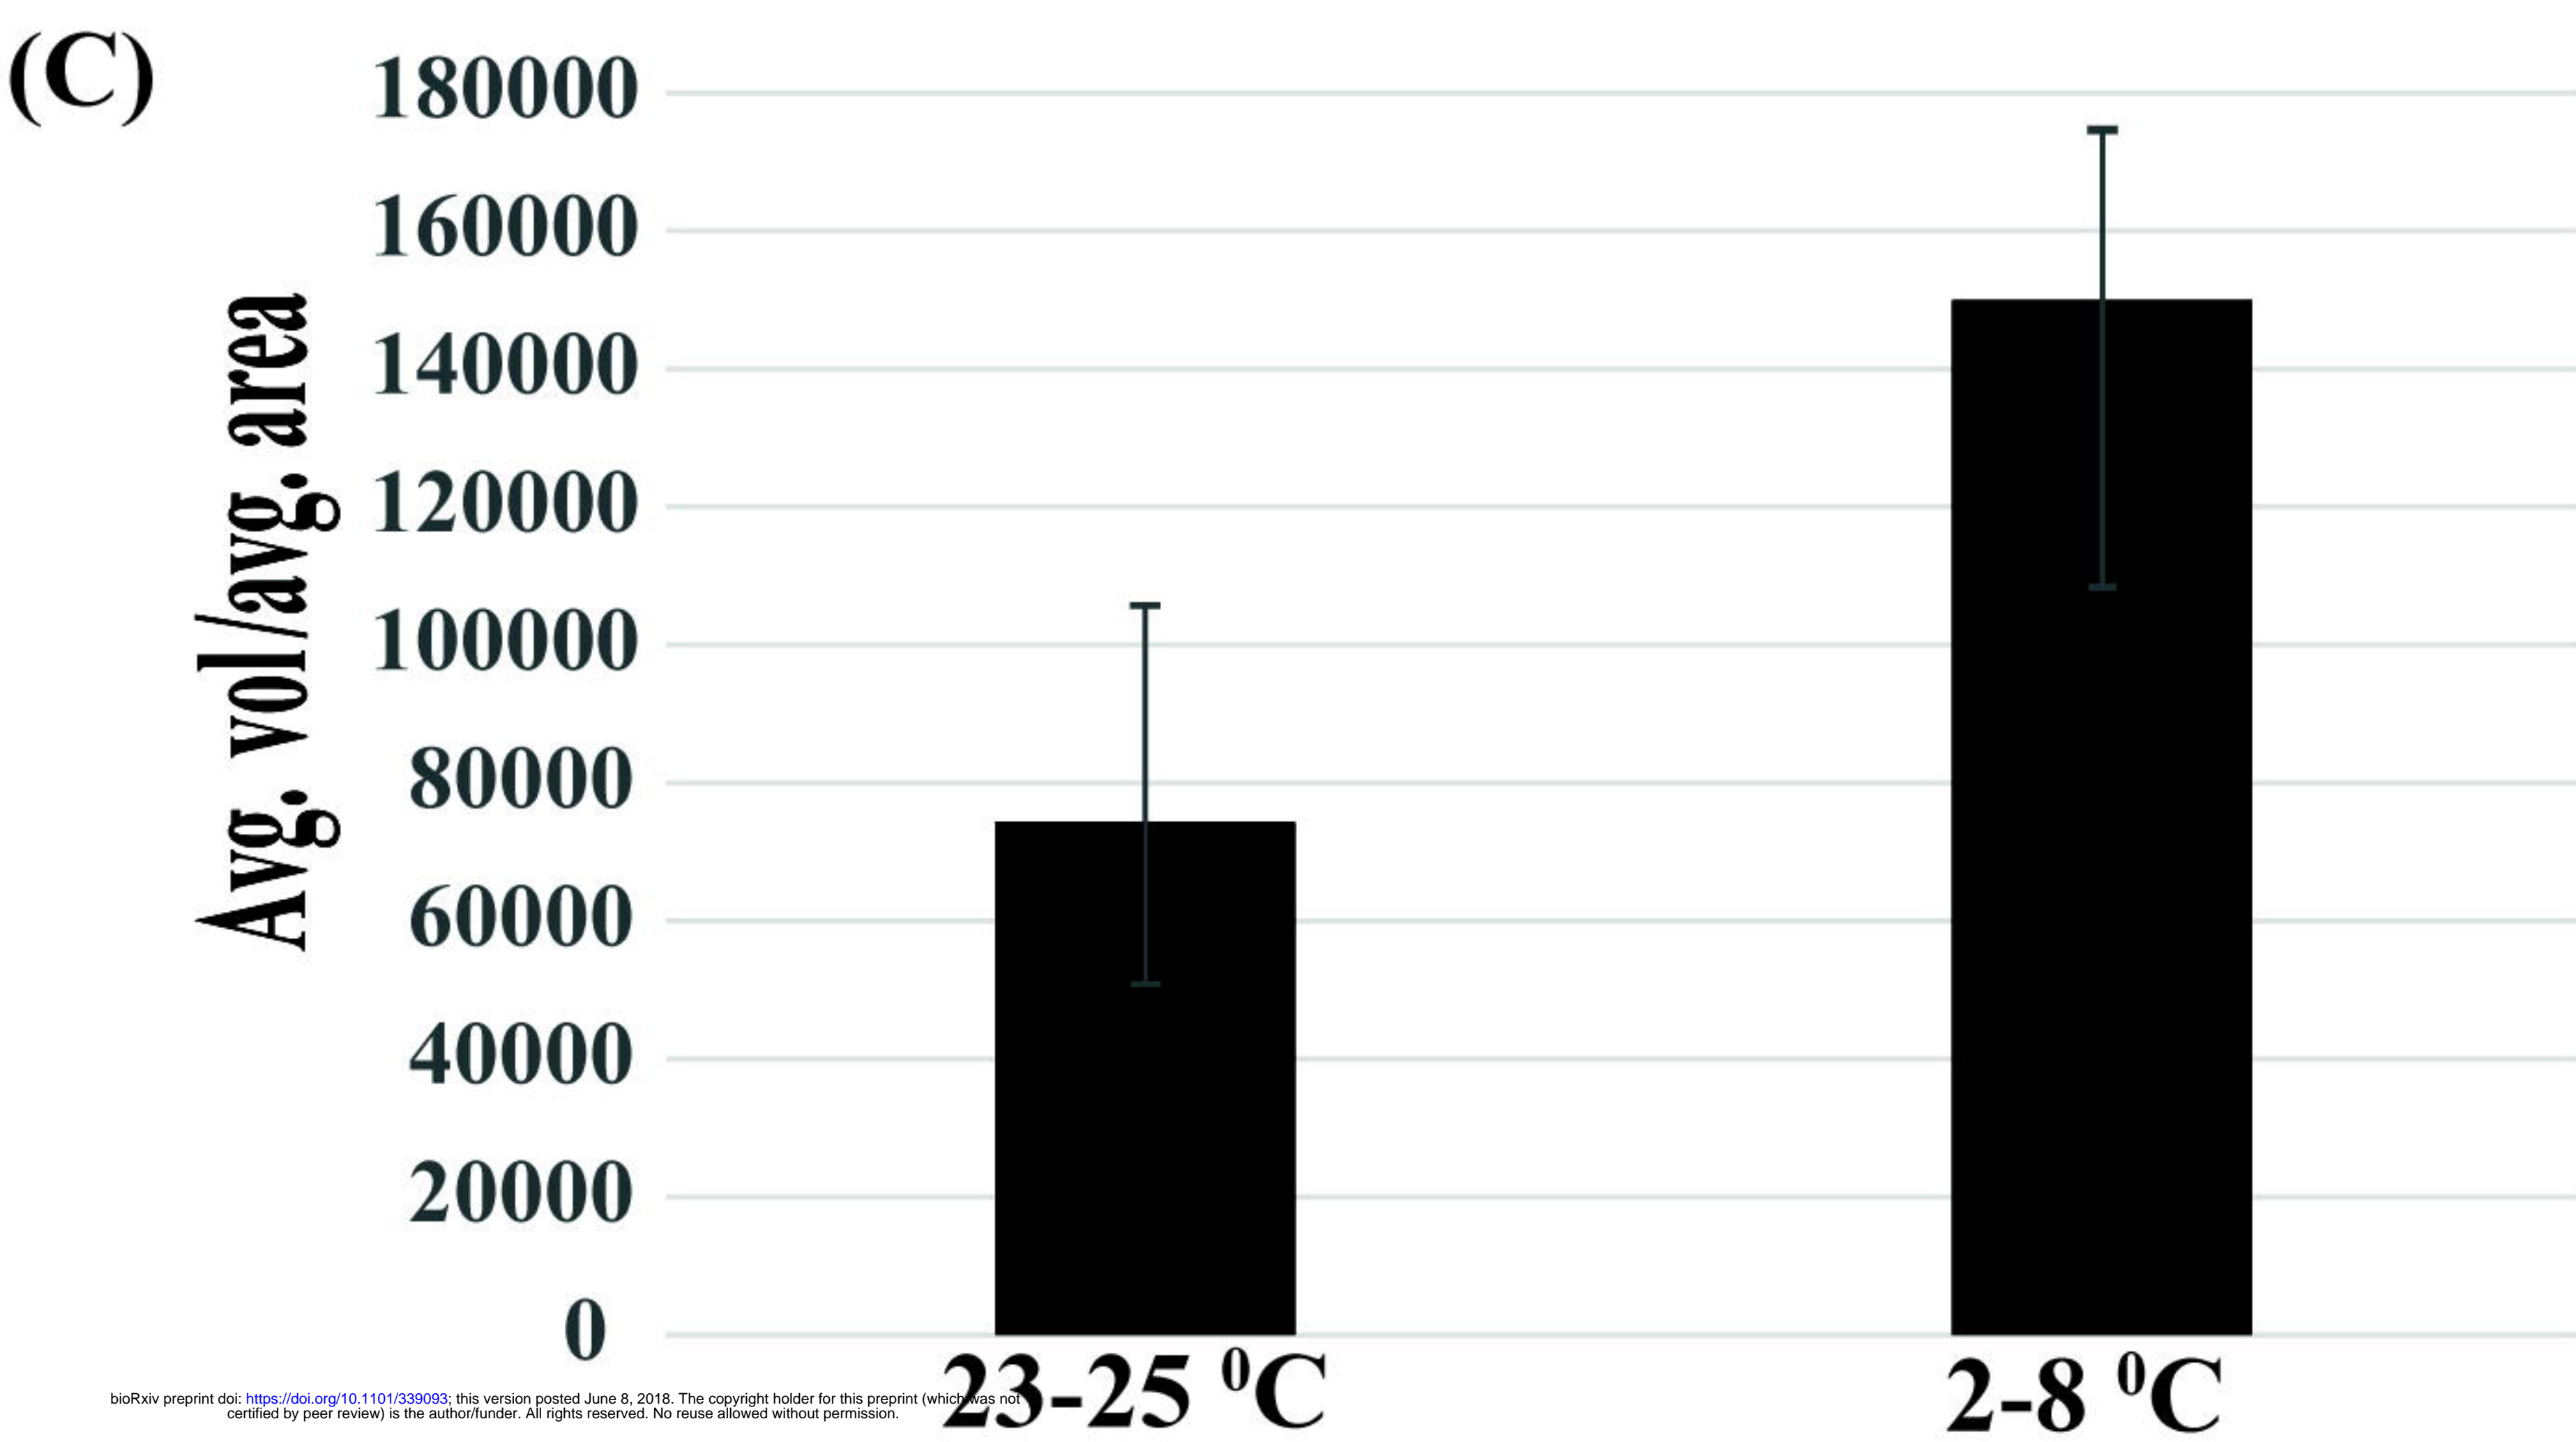

bioRxiv preprint doi: <https://doi.org/10.1101/339093>; this version posted June 8, 2018. The copyright holder for this preprint (which was not certified by peer review) is the author/funder. All rights reserved. No reuse allowed without permission.

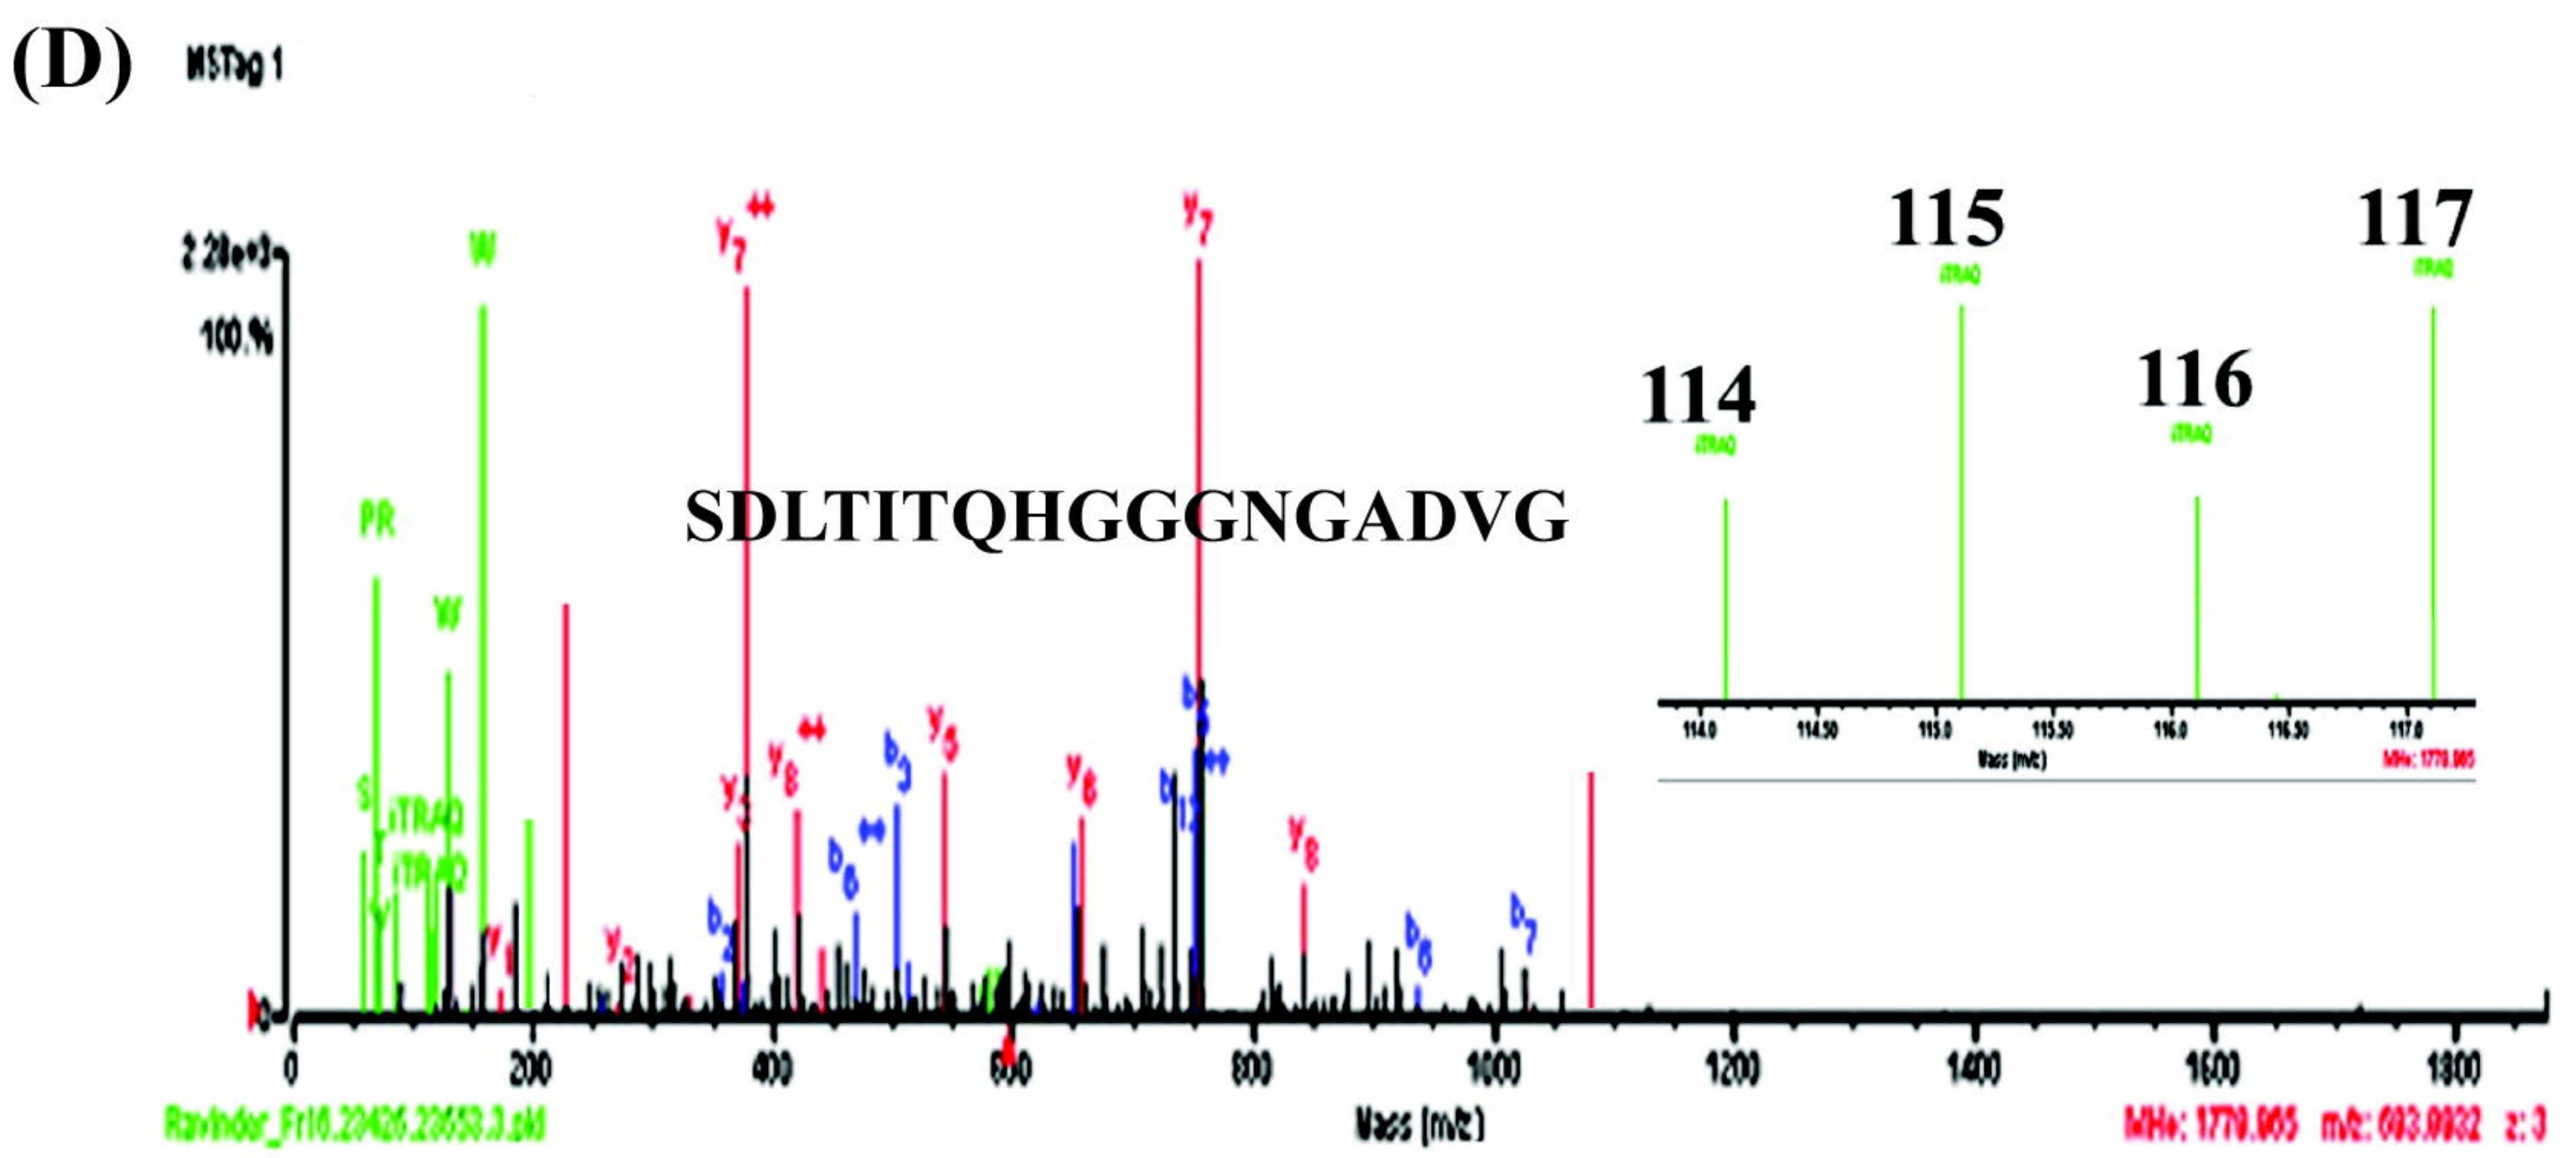



23-25 °C

(A) Control cycling cells

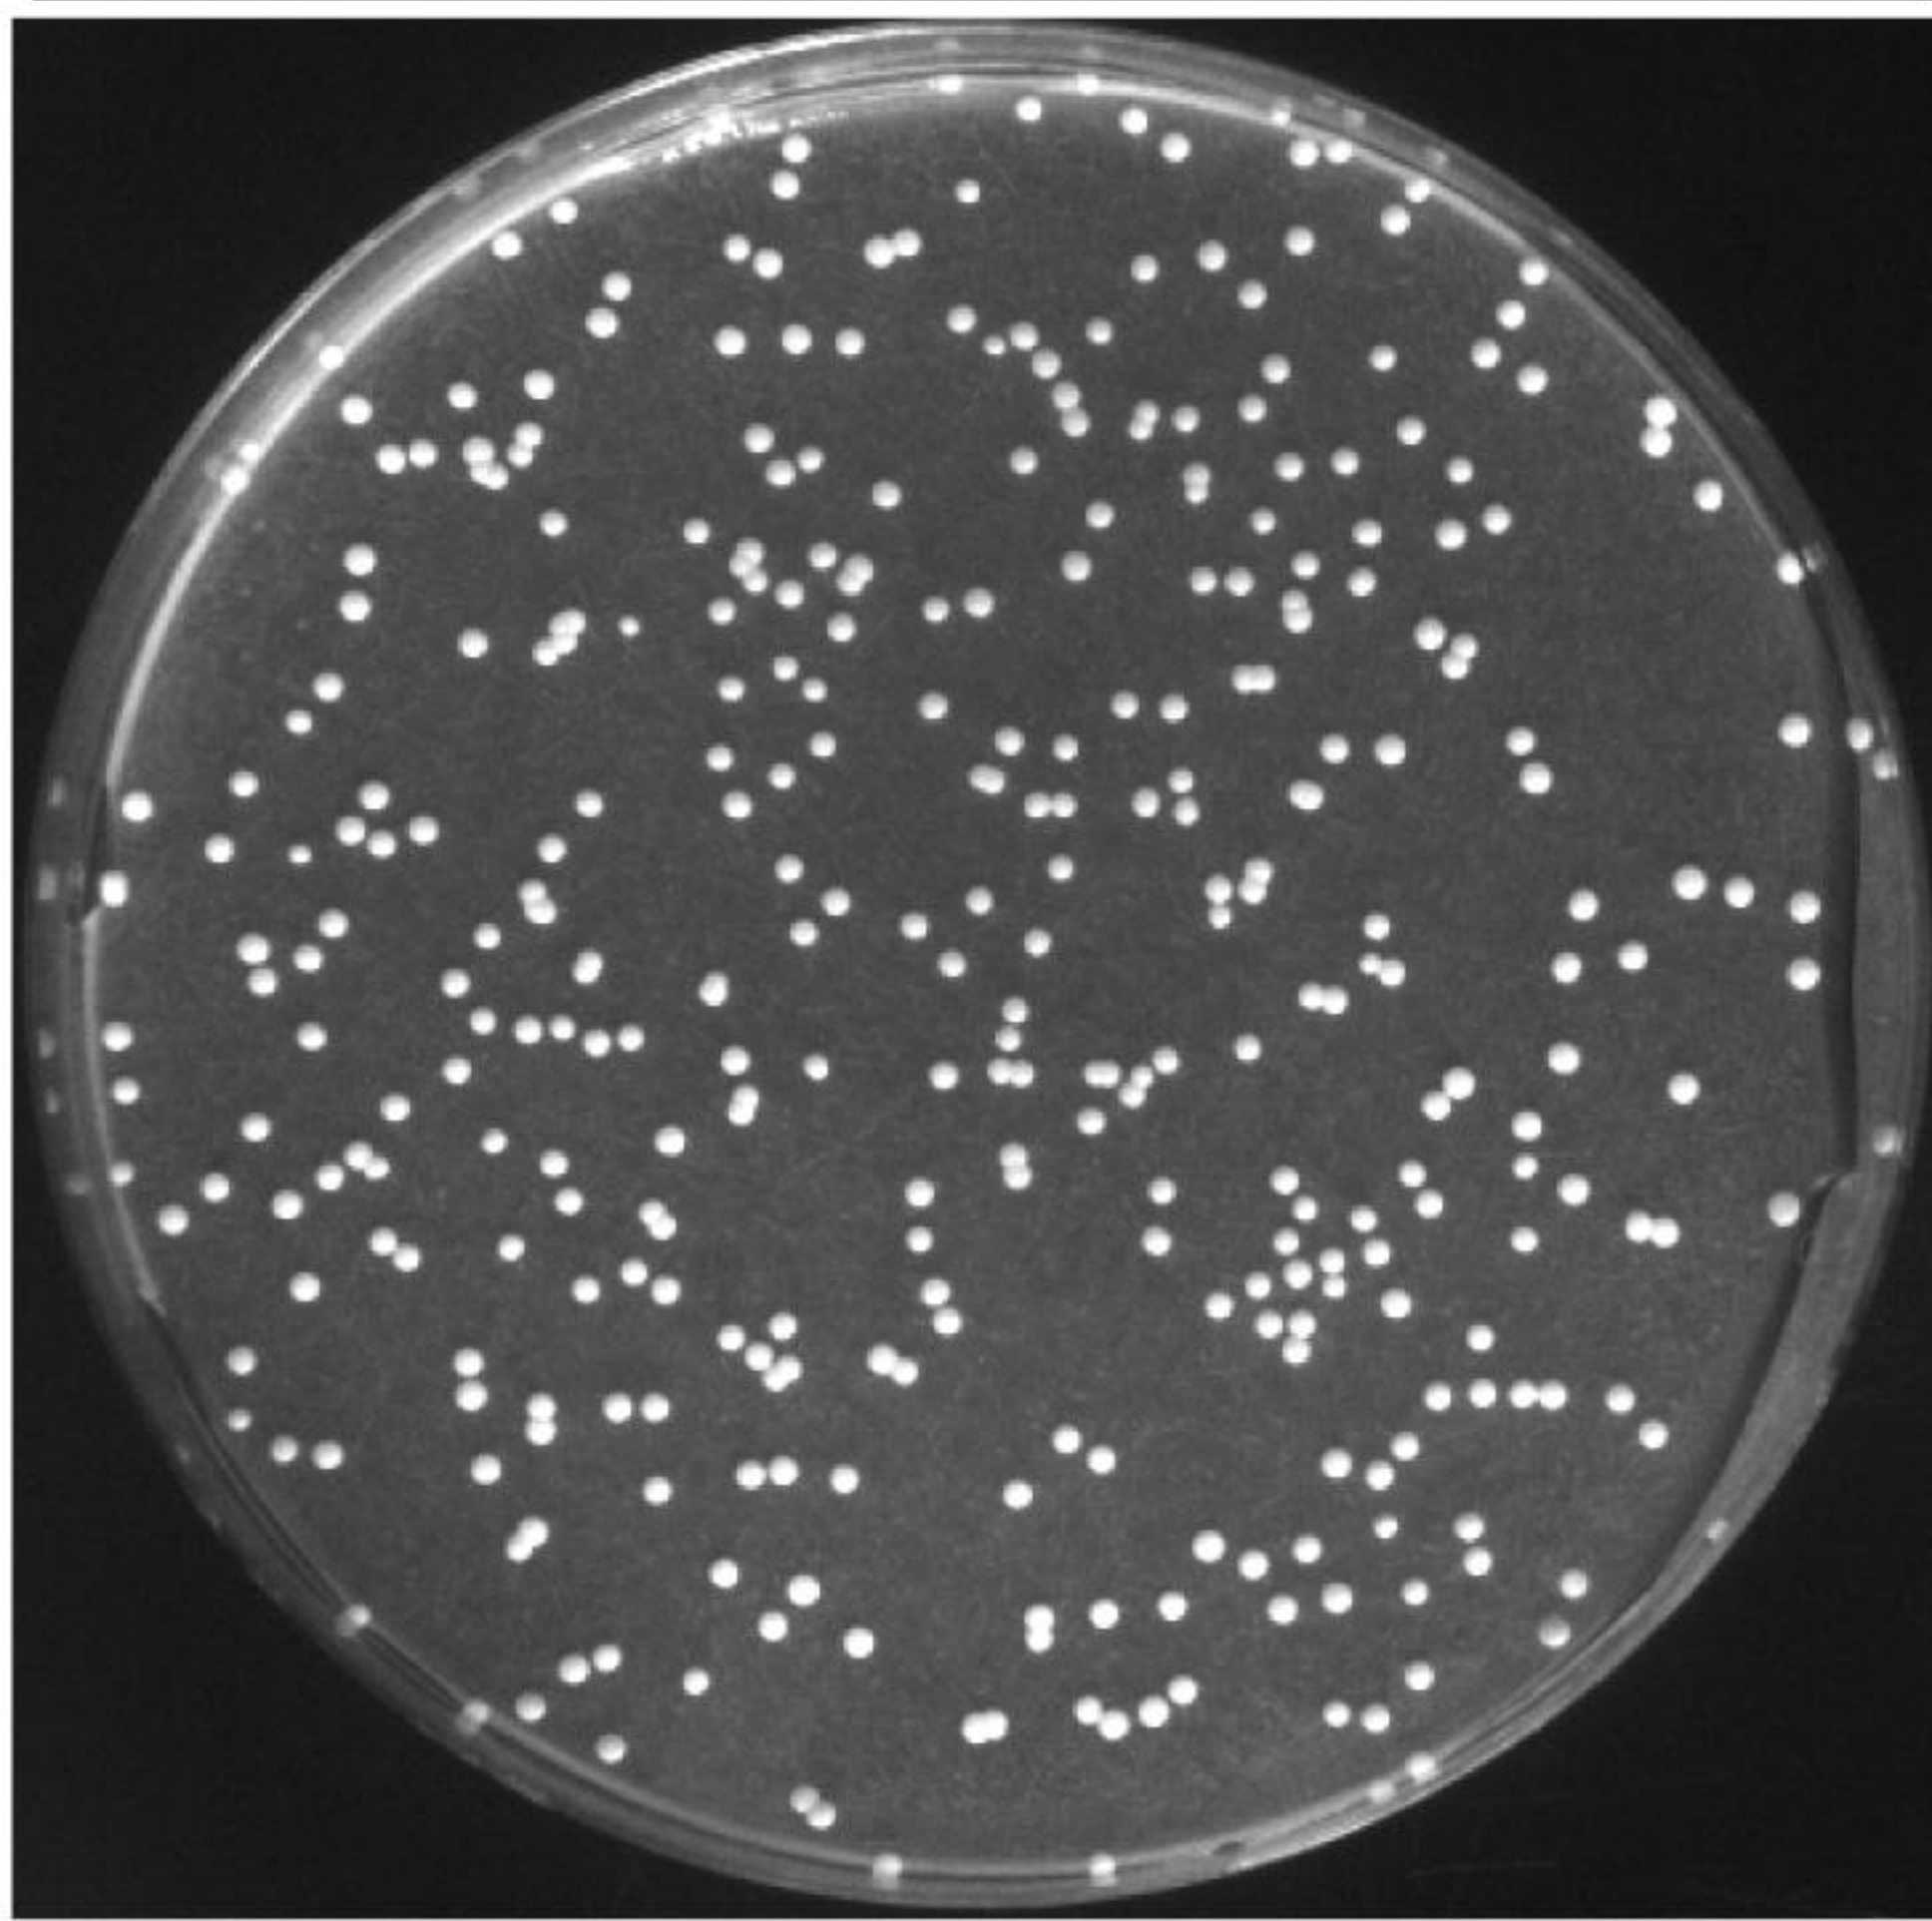

Stationary phase cells

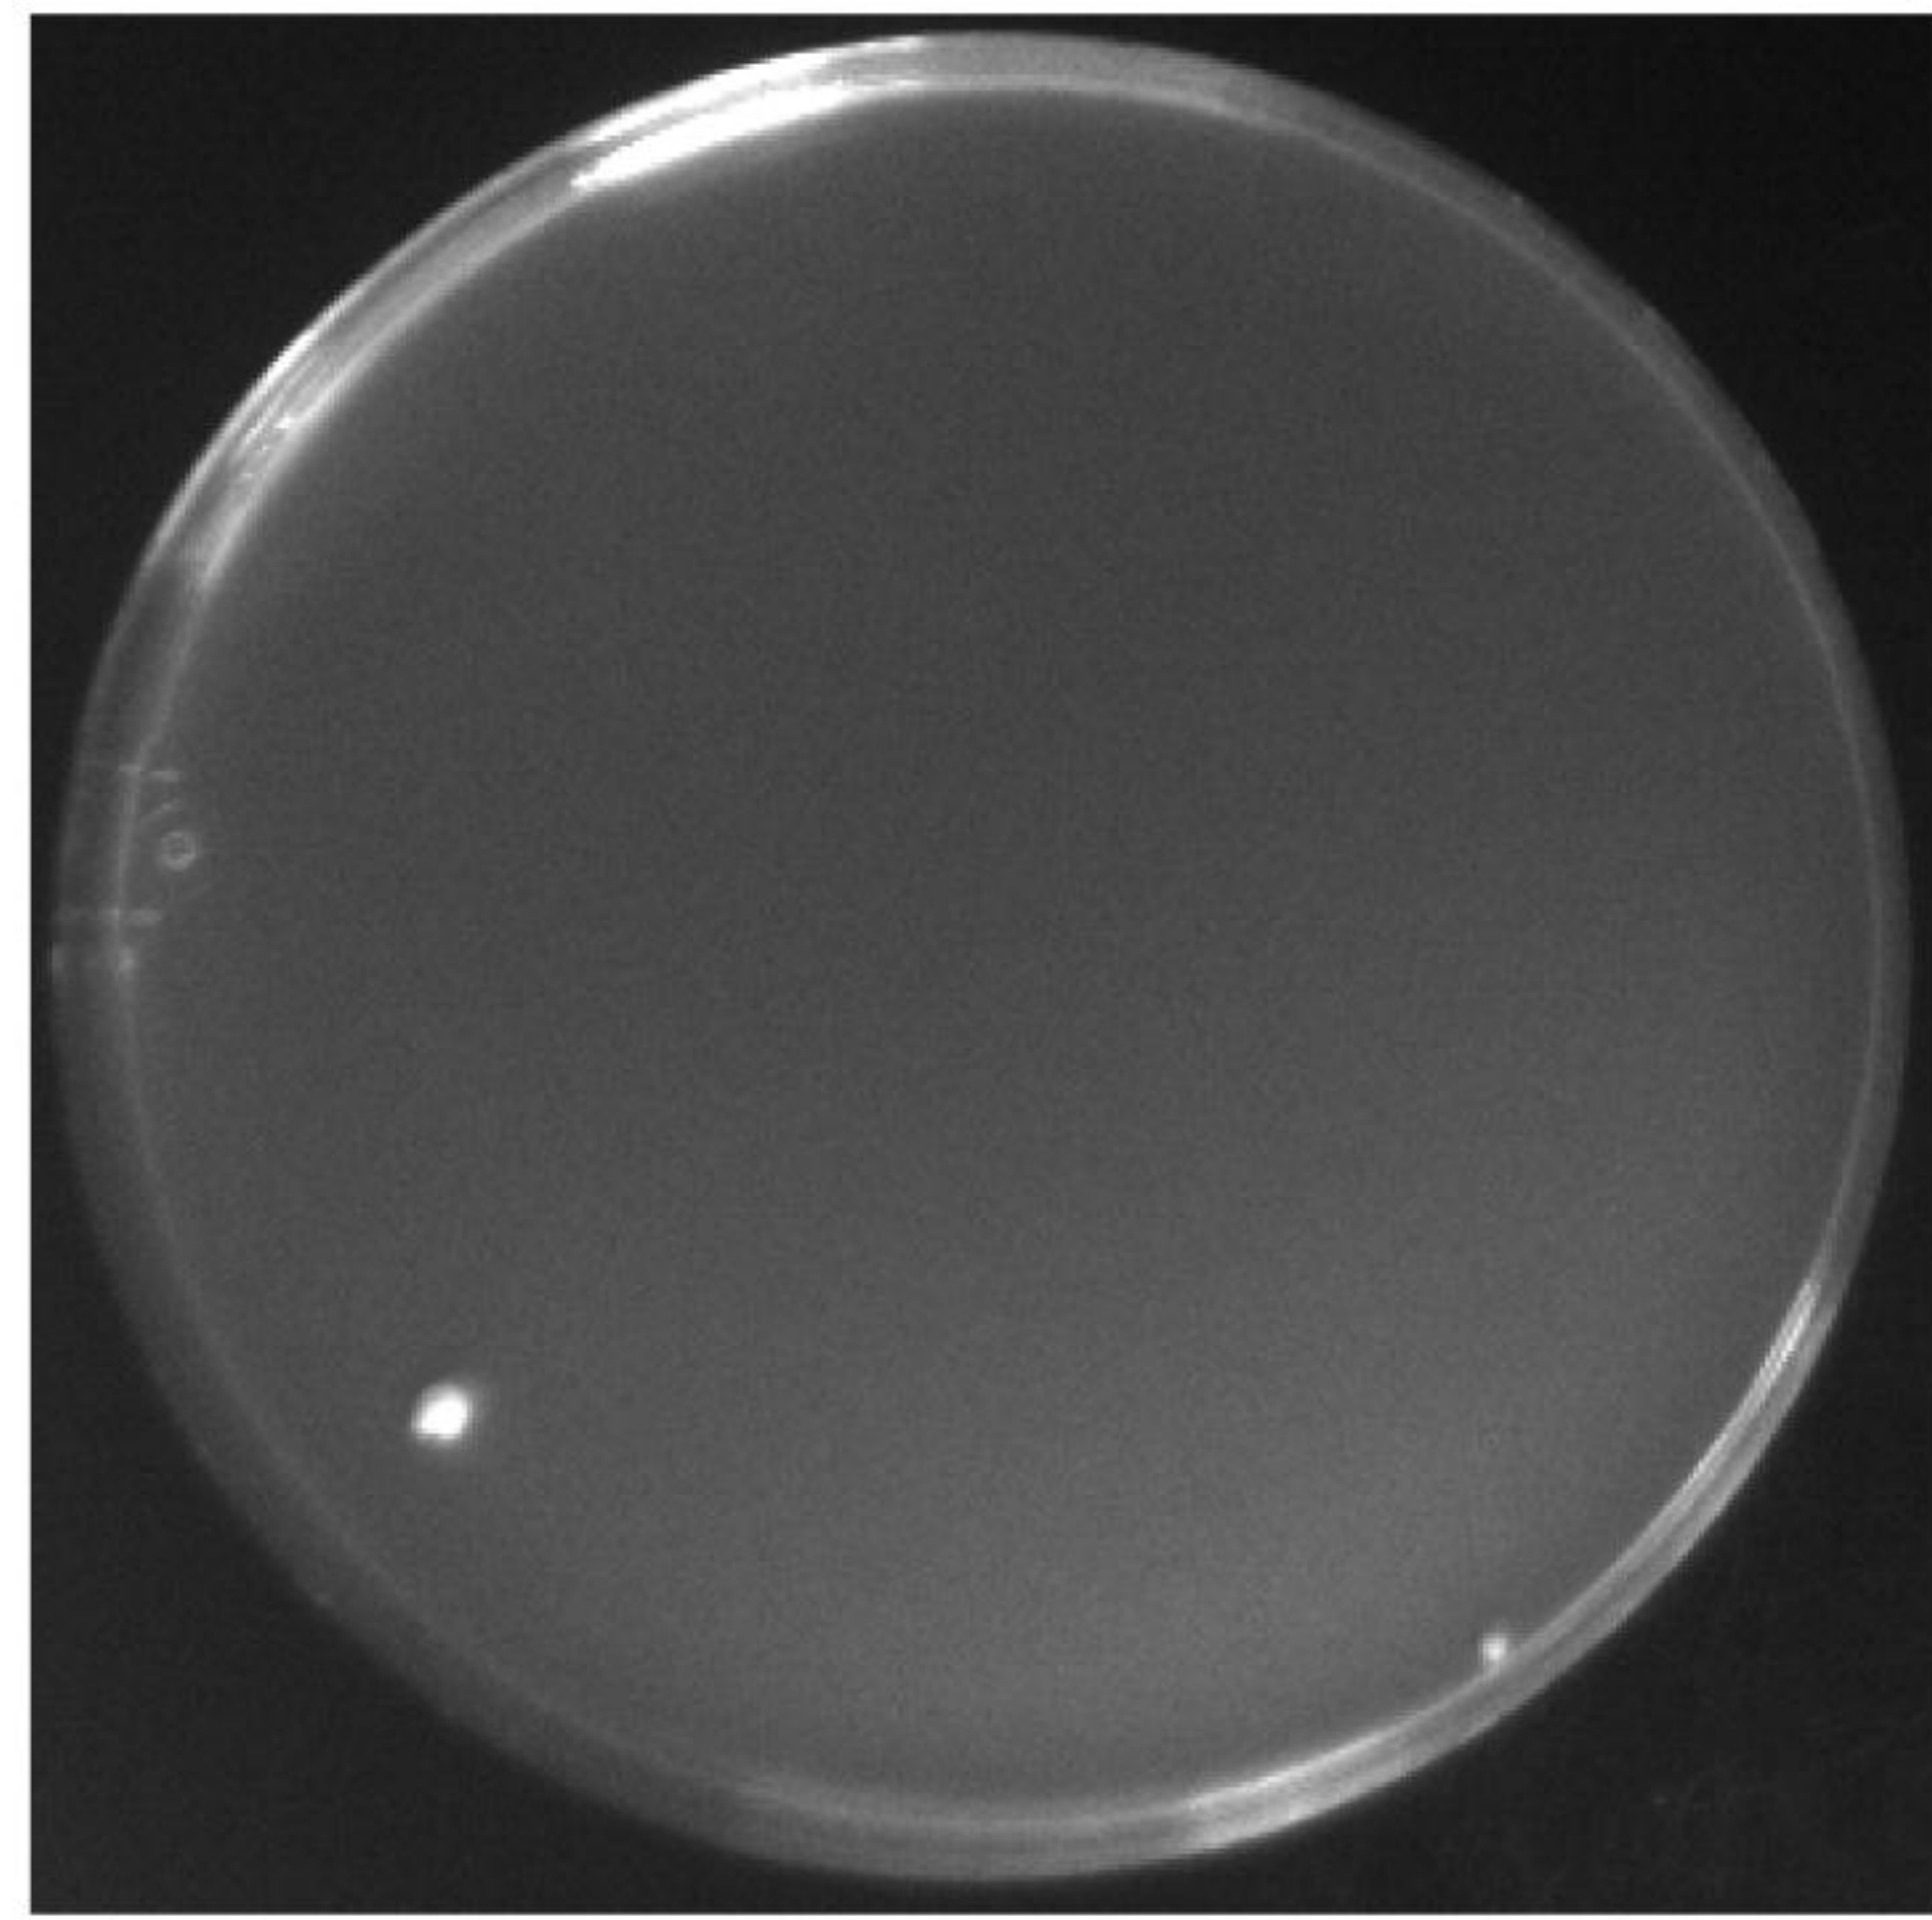

2-8 °C

(B) Control cycling cells

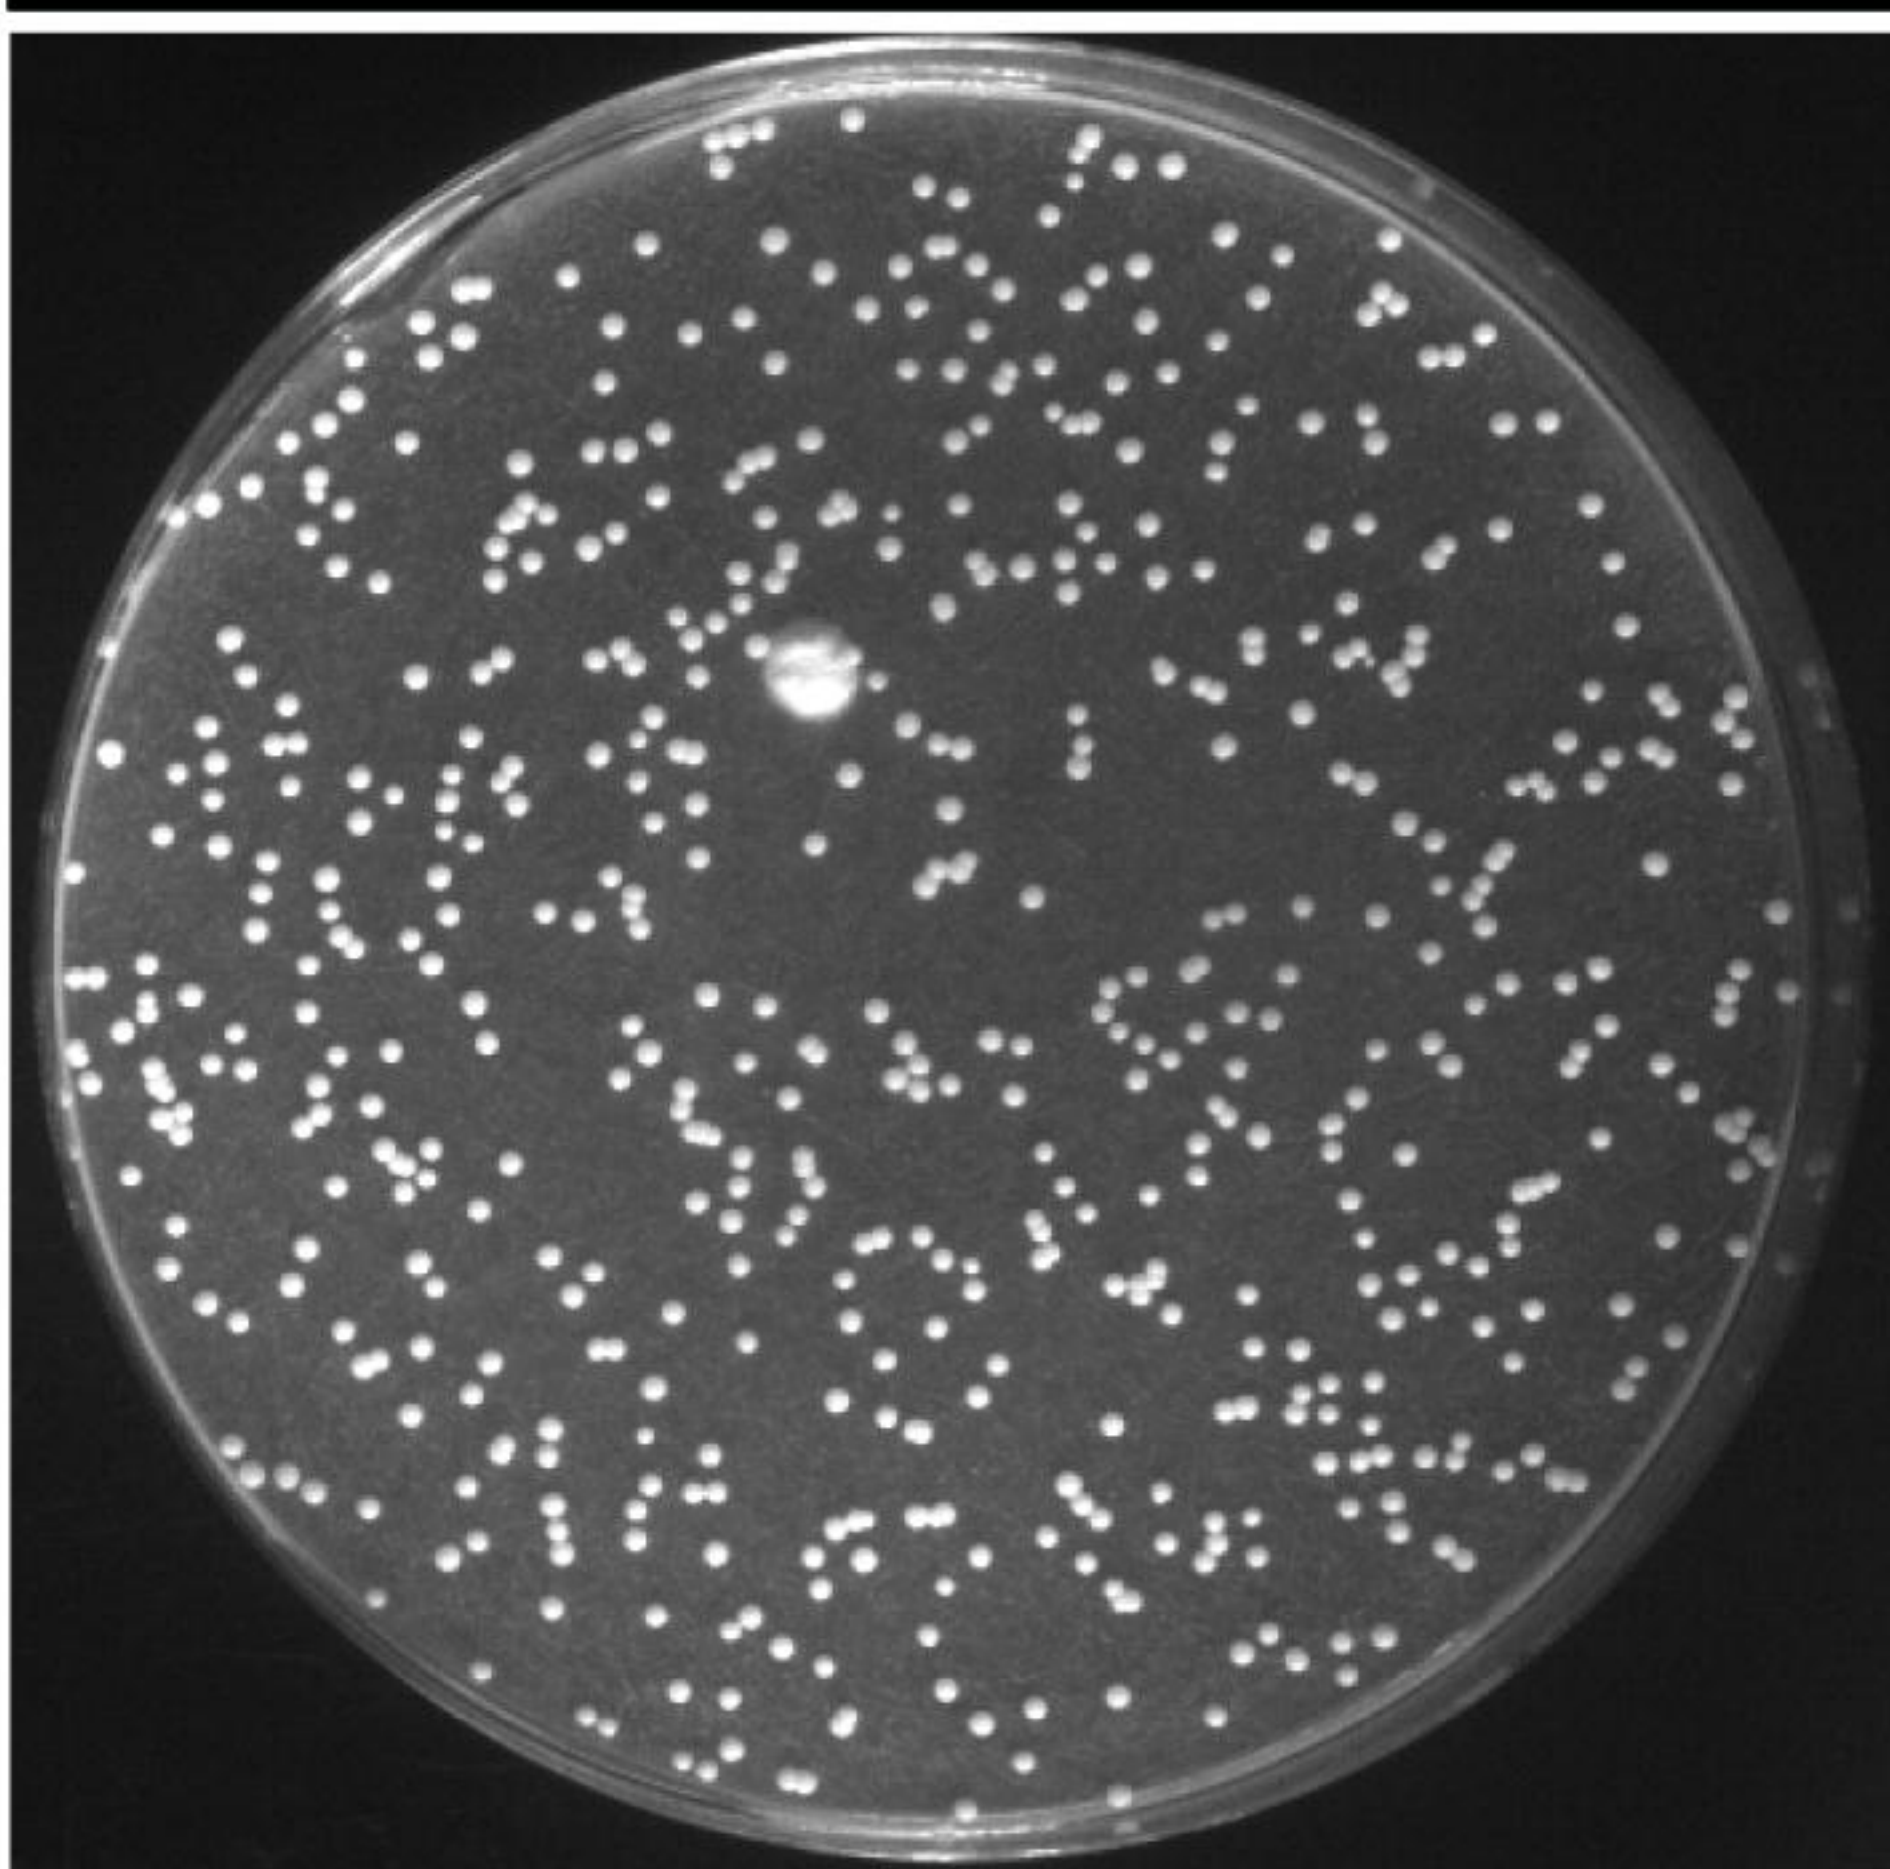

Stationary phase cells

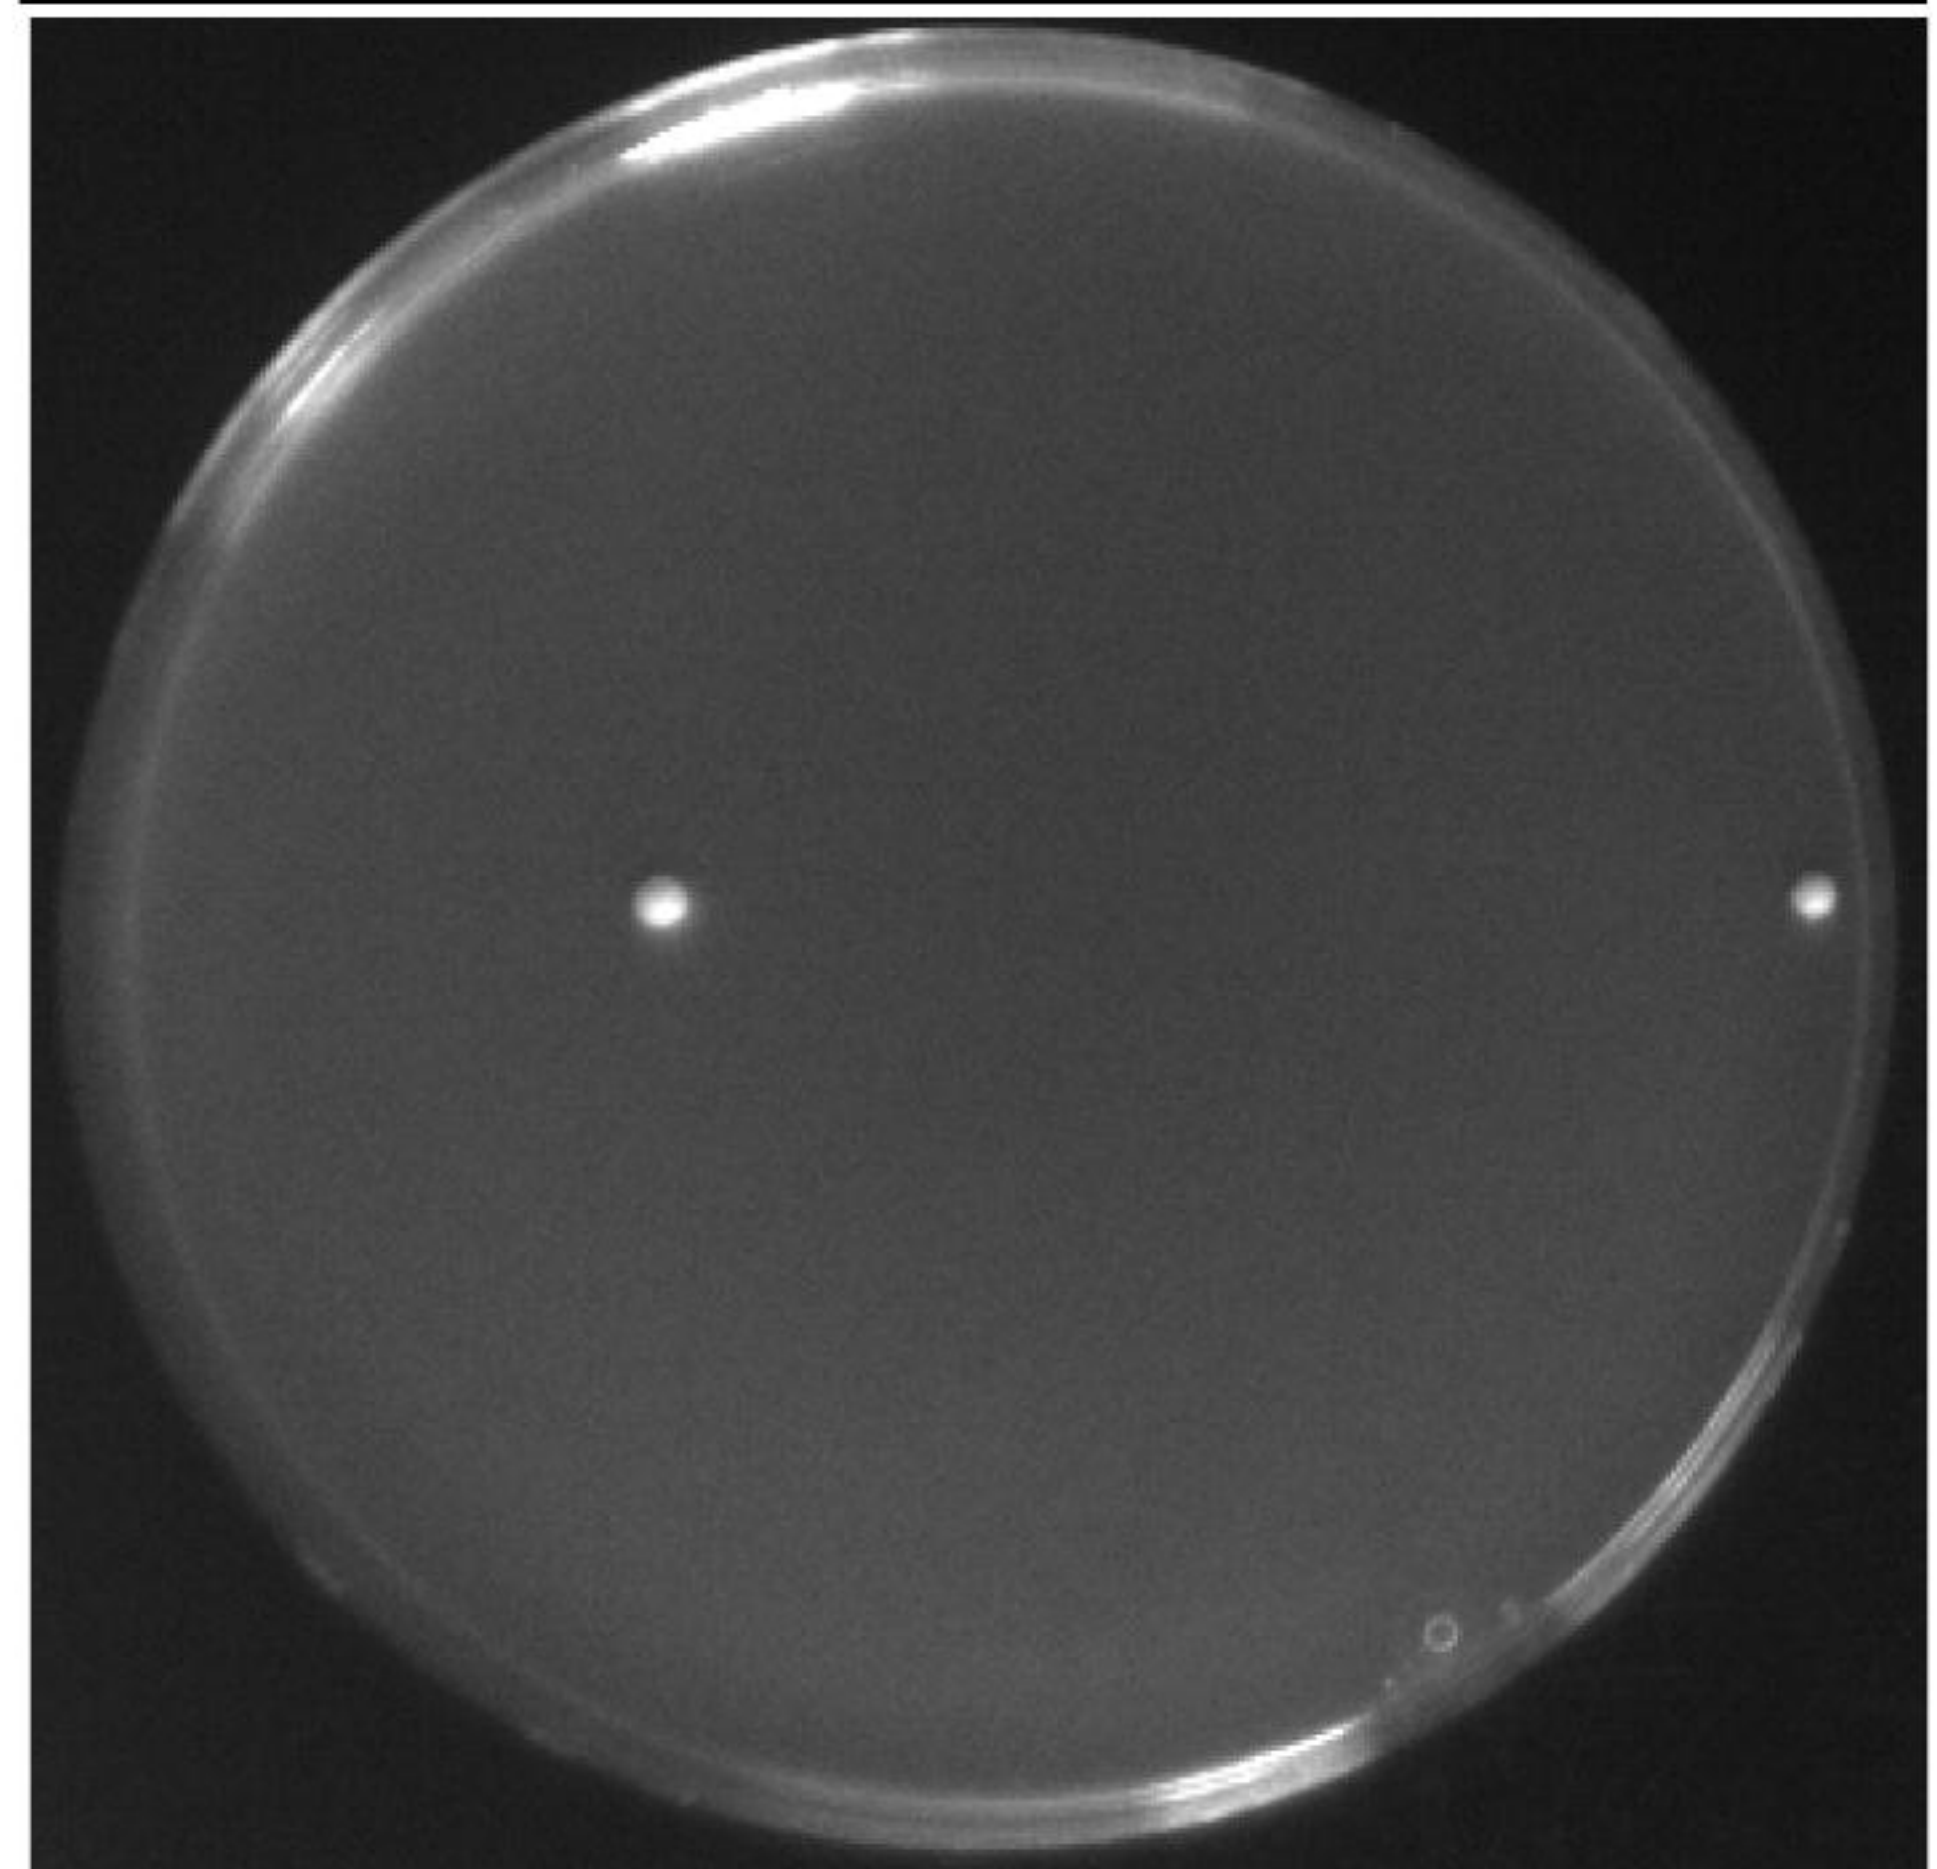

(C) 100

bioRxiv preprint doi: <https://doi.org/10.1101/339093>; this version posted June 8, 2018. The copyright holder for this preprint (which was not certified by peer review) is the author/funder. All rights reserved. No reuse allowed without permission.

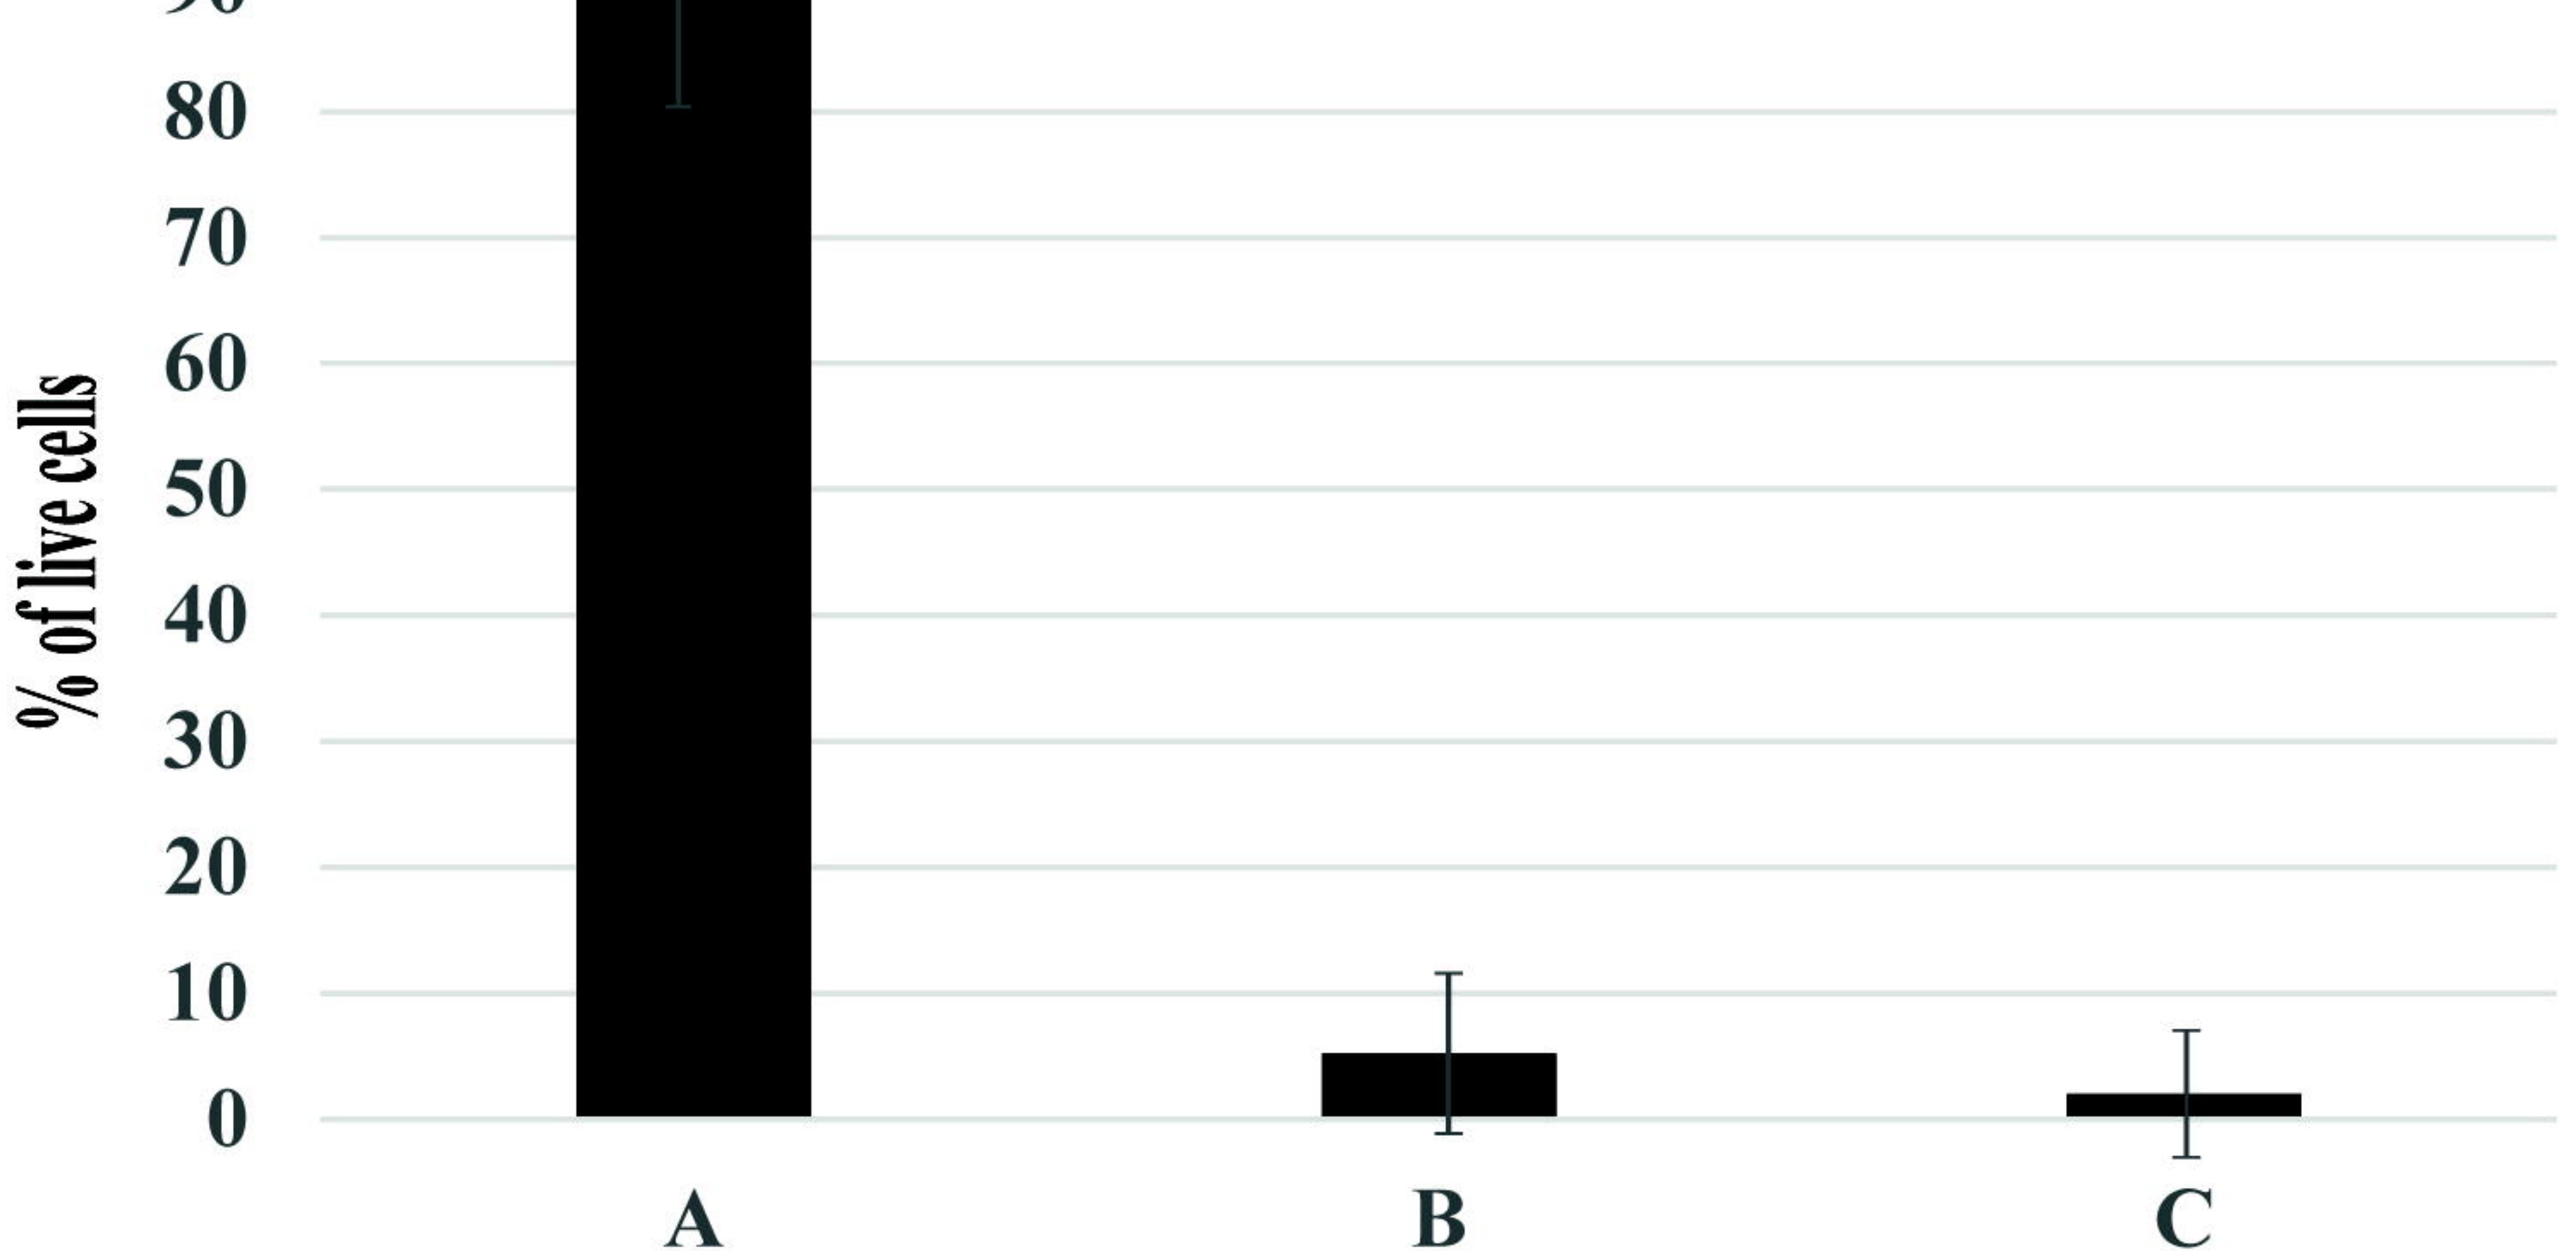



(A)

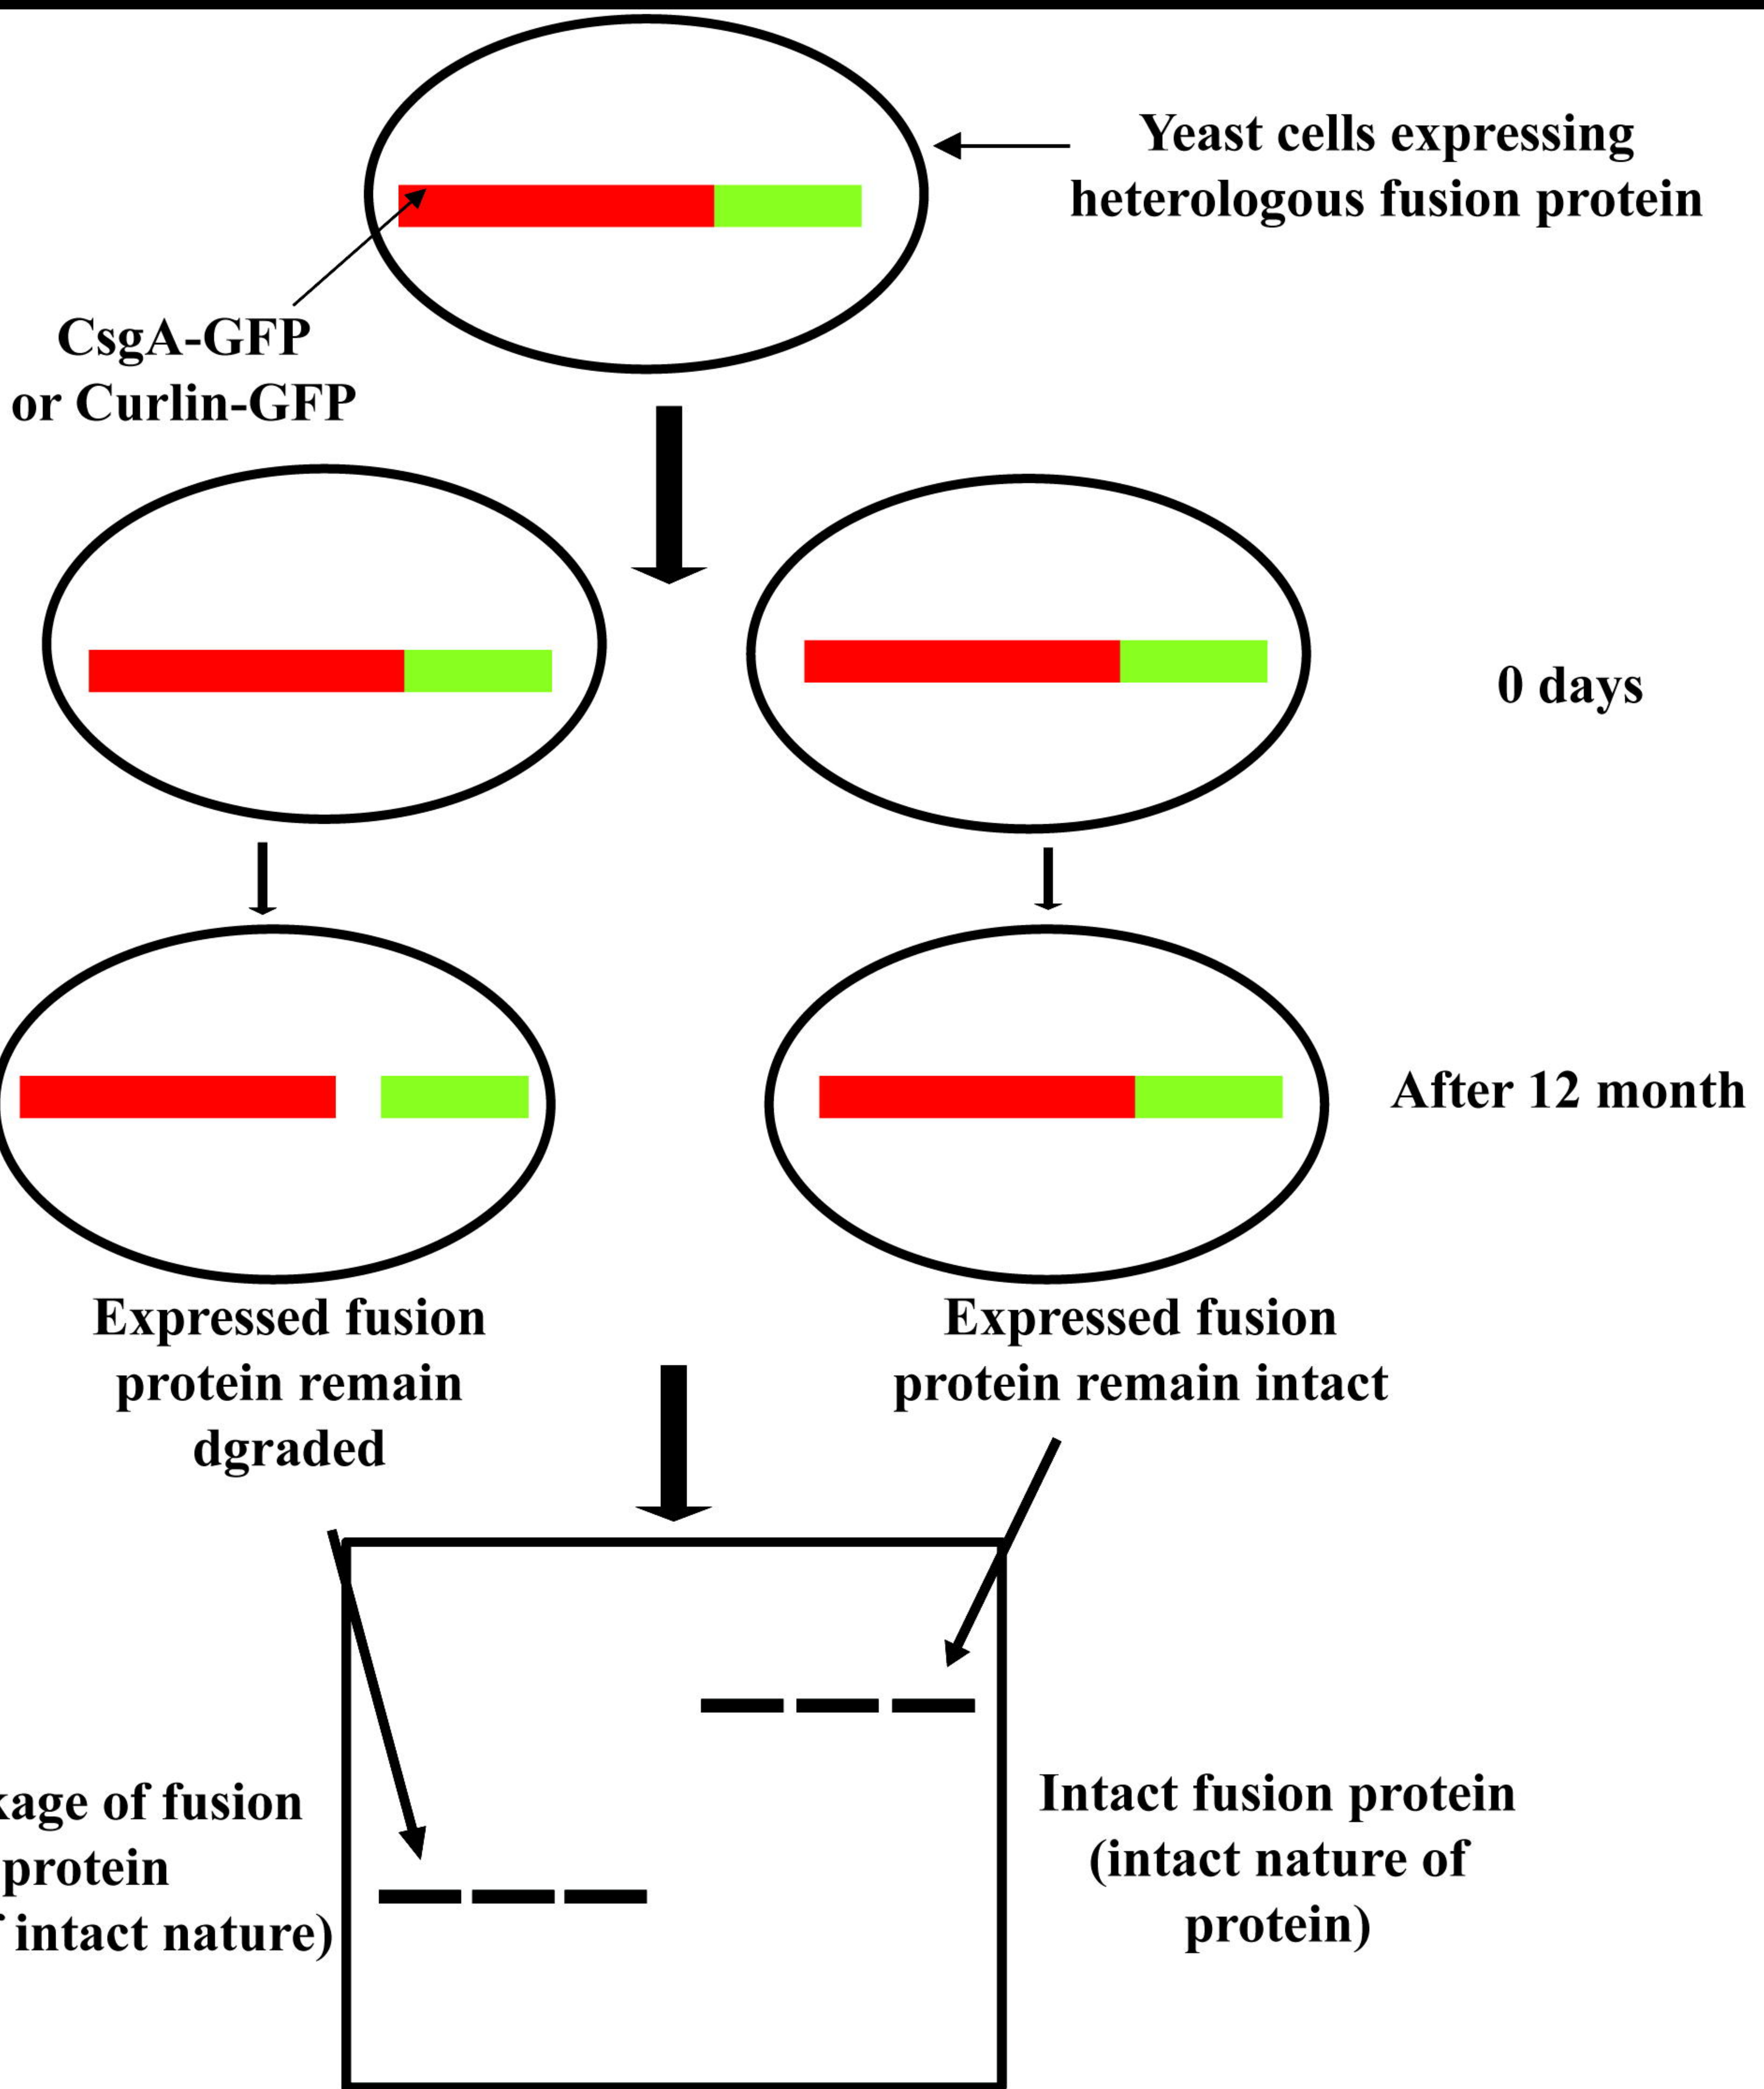

(B)

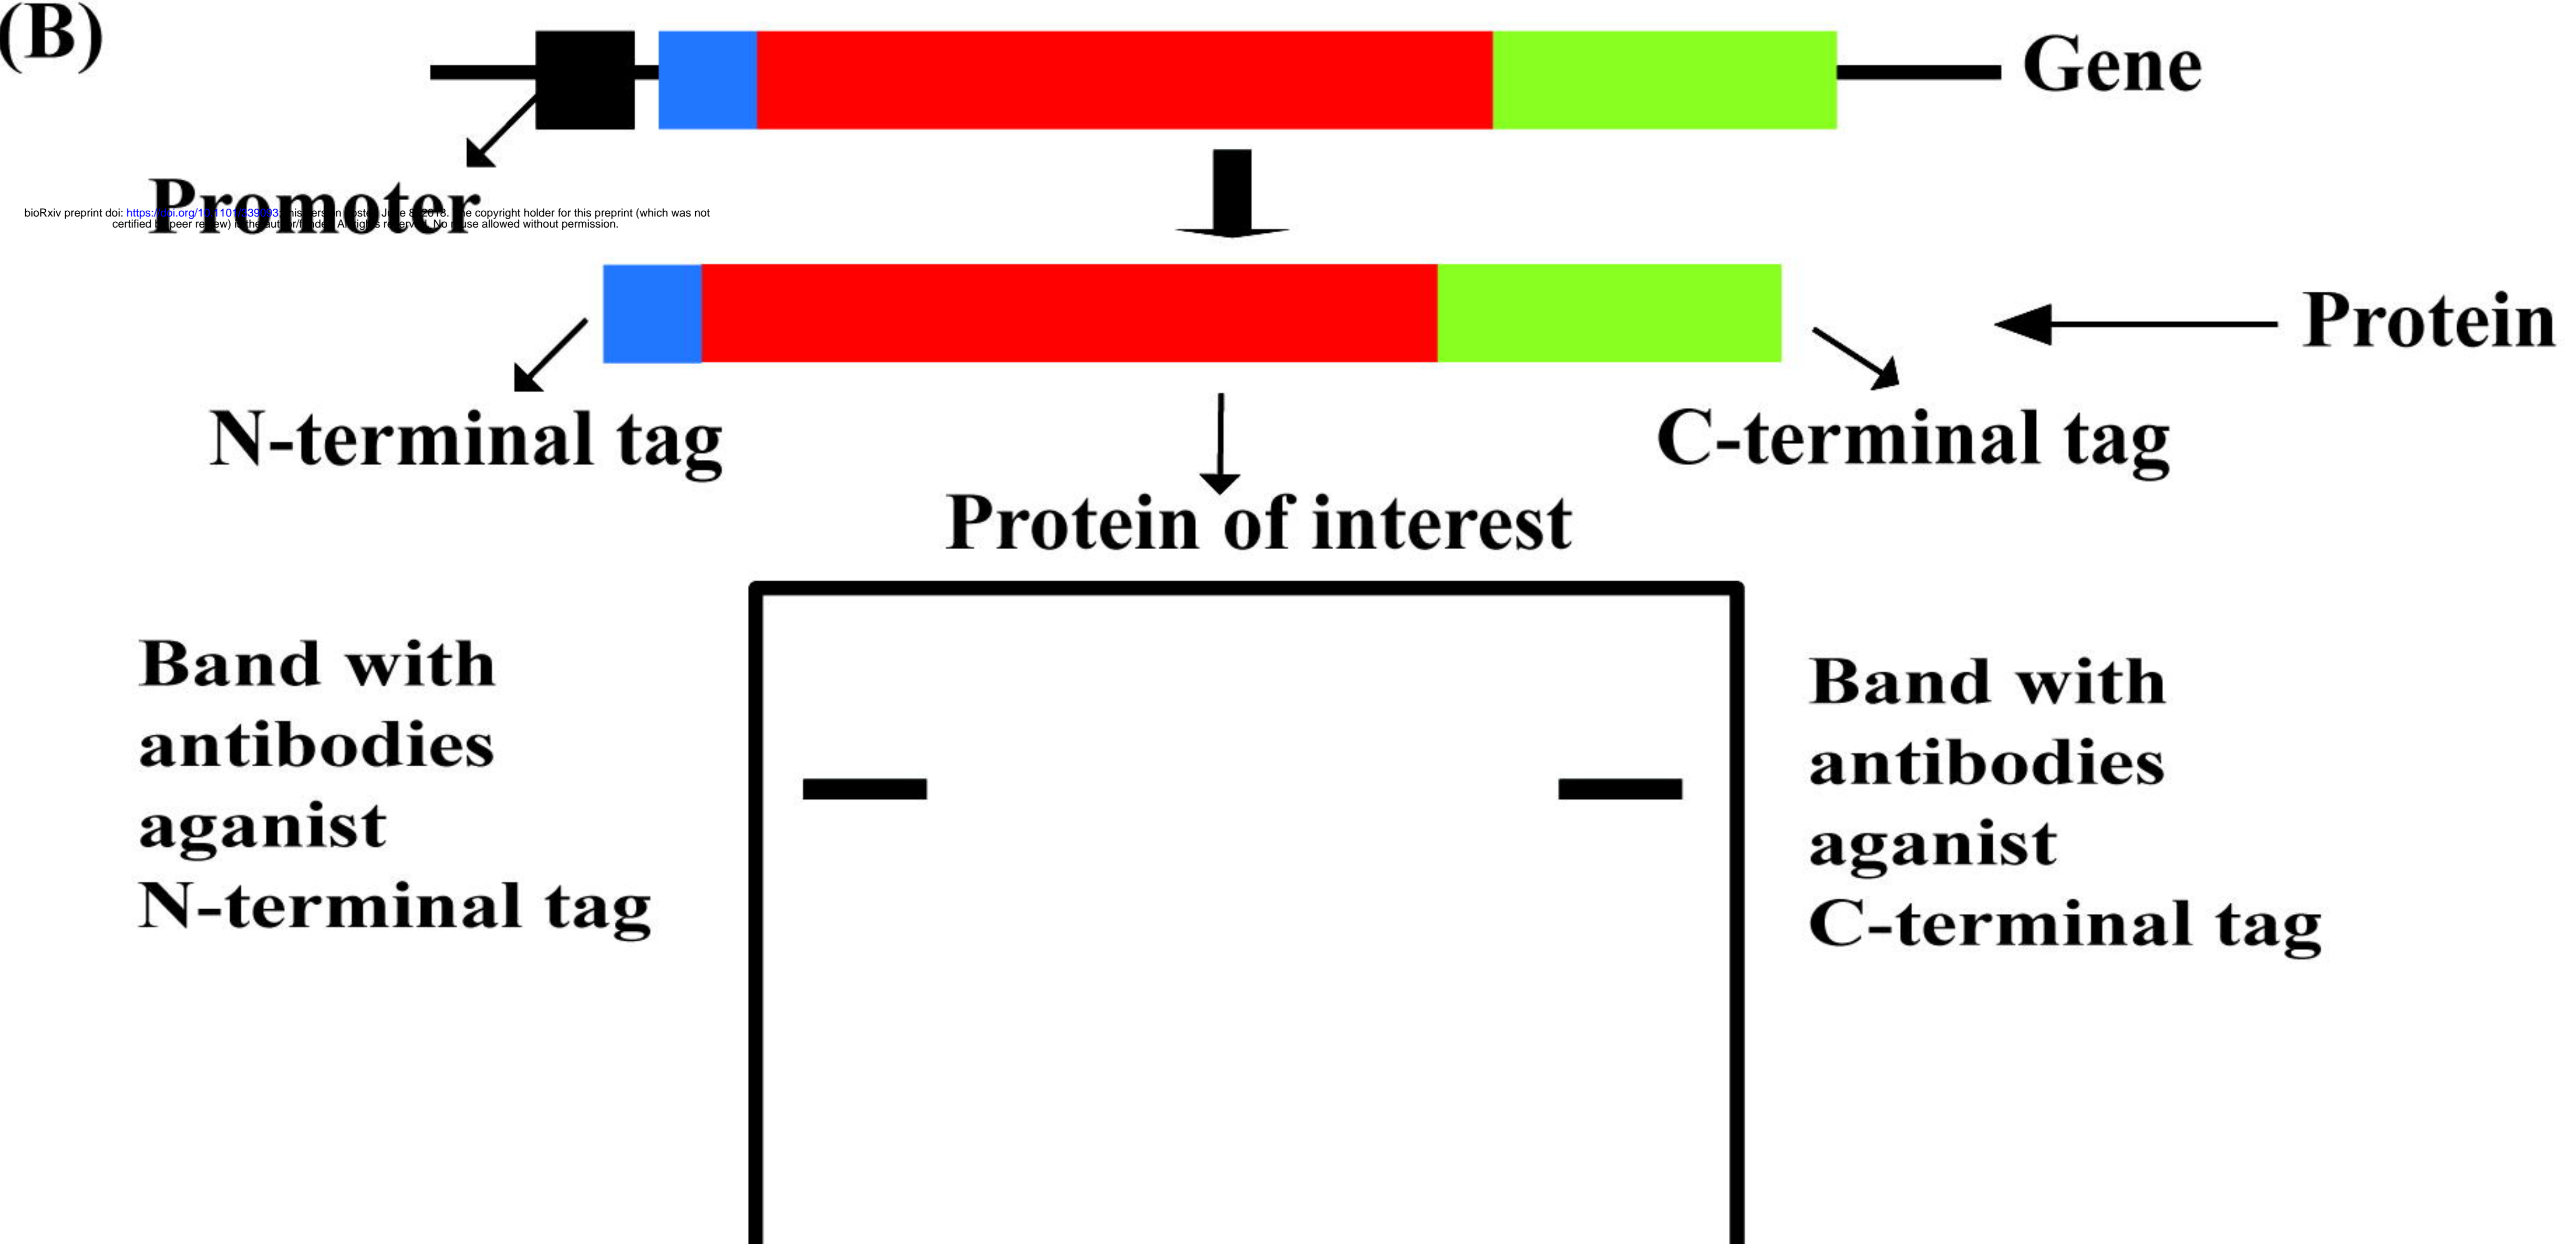

Source: https://www.biorxiv.org/content/10.1101/339093v1.full.pdf
